# Supplementary material for: Methane production from hydrocarbons by consortia dominated by ANME archaea
Source: Research Square preprint supplement (doi:10.21203/rs.3.rs-5404613/v1), 2024-11-25
Supplement: Supplementary file 1 [file 9e5e5d433ef2cf6881f1048a.xlsx]

## Sheet: S1_NCBI_Genome_Submission
biosample_accession	sample_name	assembly_date	assembly_name	assembly_method	assembly_method_version	genome_coverage	sequencing_technology	reference_genome	update_for	bacteria_available_from	filename
PRJNA924812				IDBA	1.1.3	0.035427	Illumina MiSeq				CH_100.faa
PRJNA924812				IDBA	1.1.3	0.0744034	Illumina MiSeq				CH_101_sub.faa
PRJNA924812				IDBA	1.1.3	0.0416515	Illumina MiSeq				CH_103.faa
PRJNA924812				IDBA	1.1.3	0.0214257	Illumina MiSeq				CH_10.faa
PRJNA924812				IDBA	1.1.3	0.146022	Illumina MiSeq				CH_115.faa
PRJNA924812				IDBA	1.1.3	0.18913	Illumina MiSeq				CH_122.faa
PRJNA924812				IDBA	1.1.3	0.0649965	Illumina MiSeq				CH_123.faa
PRJNA924812				IDBA	1.1.3	0.0724454	Illumina MiSeq				CH_123_sub.faa
PRJNA924812				IDBA	1.1.3	0.0376178	Illumina MiSeq				CH_12.faa
PRJNA924812				IDBA	1.1.3	0.0423896	Illumina MiSeq				CH_130.faa
PRJNA924812				IDBA	1.1.3	0.0549446	Illumina MiSeq				CH_134.faa
PRJNA924812				IDBA	1.1.3	0.17236	Illumina MiSeq				CH_135.faa
PRJNA924812				IDBA	1.1.3	0.0847889	Illumina MiSeq				CH_137_sub.faa
PRJNA924812				IDBA	1.1.3	0.0495863	Illumina MiSeq				CH_139.faa
PRJNA924812				IDBA	1.1.3	0.084451	Illumina MiSeq				CH_13.faa
PRJNA924812				IDBA	1.1.3	0.0743946	Illumina MiSeq				CH_140.faa
PRJNA924812				IDBA	1.1.3	0.0357098	Illumina MiSeq				CH_140_sub.faa
PRJNA924812				IDBA	1.1.3	0.0378416	Illumina MiSeq				CH_141_sub.faa
PRJNA924812				IDBA	1.1.3	0.03331	Illumina MiSeq				CH_142.faa
PRJNA924812				IDBA	1.1.3	0.0516883	Illumina MiSeq				CH_144.faa
PRJNA924812				IDBA	1.1.3	0.0212297	Illumina MiSeq				CH_144_sub.faa
PRJNA924812				IDBA	1.1.3	0.0335961	Illumina MiSeq				CH_149.faa
PRJNA924812				IDBA	1.1.3	0.460419	Illumina MiSeq				CH_155.faa
PRJNA924812				IDBA	1.1.3	0.358381	Illumina MiSeq				CH_159.faa
PRJNA924812				IDBA	1.1.3	0.111852	Illumina MiSeq				CH_15.faa
PRJNA924812				IDBA	1.1.3	0.0765438	Illumina MiSeq				CH_160.faa
PRJNA924812				IDBA	1.1.3	0.0374823	Illumina MiSeq				CH_15_sub.faa
PRJNA924812				IDBA	1.1.3	0.0373013	Illumina MiSeq				CH_165_sub.faa
PRJNA924812				IDBA	1.1.3	0.0394197	Illumina MiSeq				CH_166.faa
PRJNA924812				IDBA	1.1.3	0.0465154	Illumina MiSeq				CH_16.faa
PRJNA924812				IDBA	1.1.3	0.0430577	Illumina MiSeq				CH_172.faa
PRJNA924812				IDBA	1.1.3	0.0420672	Illumina MiSeq				CH_173.faa
PRJNA924812				IDBA	1.1.3	0.0624381	Illumina MiSeq				CH_174_sub.faa
PRJNA924812				IDBA	1.1.3	0.154712	Illumina MiSeq				CH_175.faa
PRJNA924812				IDBA	1.1.3	0.309918	Illumina MiSeq				CH_178.faa
PRJNA924812				IDBA	1.1.3	0.0433803	Illumina MiSeq				CH_179.faa
PRJNA924812				IDBA	1.1.3	0.0329458	Illumina MiSeq				CH_180.faa
PRJNA924812				IDBA	1.1.3	0.033674	Illumina MiSeq				CH_197.faa
PRJNA924812				IDBA	1.1.3	0.150014	Illumina MiSeq				CH_198_sub.faa
PRJNA924812				IDBA	1.1.3	0.0633533	Illumina MiSeq				CH_19.faa
PRJNA924812				IDBA	1.1.3	0.185747	Illumina MiSeq				CH_200.faa
PRJNA924812				IDBA	1.1.3	0.197485	Illumina MiSeq				CH_202.faa
PRJNA924812				IDBA	1.1.3	0.181677	Illumina MiSeq				CH_21.faa
PRJNA924812				IDBA	1.1.3	0.0992422	Illumina MiSeq				CH_22.faa
PRJNA924812				IDBA	1.1.3	0.144242	Illumina MiSeq				CH_23.faa
PRJNA924812				IDBA	1.1.3	0.0939508	Illumina MiSeq				CH_24.faa
PRJNA924812				IDBA	1.1.3	0.121472	Illumina MiSeq				CH_27.faa
PRJNA924812				IDBA	1.1.3	0.0406056	Illumina MiSeq				CH_2.faa
PRJNA924812				IDBA	1.1.3	1.20214	Illumina MiSeq				CH_2_sub.faa
PRJNA924812				IDBA	1.1.3	0.114672	Illumina MiSeq				CH_30.faa
PRJNA924812				IDBA	1.1.3	0.0585238	Illumina MiSeq				CH_32_sub.faa
PRJNA924812				IDBA	1.1.3	0.0407713	Illumina MiSeq				CH_34.faa
PRJNA924812				IDBA	1.1.3	0.310797	Illumina MiSeq				CH_36.faa
PRJNA924812				IDBA	1.1.3	0.076372	Illumina MiSeq				CH_37.faa
PRJNA924812				IDBA	1.1.3	0.163101	Illumina MiSeq				CH_39.faa
PRJNA924812				IDBA	1.1.3	0.0600404	Illumina MiSeq				CH_3_sub.faa
PRJNA924812				IDBA	1.1.3	0.0149467	Illumina MiSeq				CH_42.faa
PRJNA924812				IDBA	1.1.3	0.036386	Illumina MiSeq				CH_45.faa
PRJNA924812				IDBA	1.1.3	0.117383	Illumina MiSeq				CH_47_sub.faa
PRJNA924812				IDBA	1.1.3	0.0470164	Illumina MiSeq				CH_49.faa
PRJNA924812				IDBA	1.1.3	0.798961	Illumina MiSeq				CH_50.faa
PRJNA924812				IDBA	1.1.3	0.0520691	Illumina MiSeq				CH_51.faa
PRJNA924812				IDBA	1.1.3	0.057168	Illumina MiSeq				CH_52_sub.faa
PRJNA924812				IDBA	1.1.3	0.0182704	Illumina MiSeq				CH_53_sub.faa
PRJNA924812				IDBA	1.1.3	0.0713721	Illumina MiSeq				CH_54_sub.faa
PRJNA924812				IDBA	1.1.3	0.491669	Illumina MiSeq				CH_55_sub.faa
PRJNA924812				IDBA	1.1.3	0.0403711	Illumina MiSeq				CH_58_sub.faa
PRJNA924812				IDBA	1.1.3	0.0297584	Illumina MiSeq				CH_5.faa
PRJNA924812				IDBA	1.1.3	0.430497	Illumina MiSeq				CH_64_sub.faa
PRJNA924812				IDBA	1.1.3	0.423422	Illumina MiSeq				CH_67_sub.faa
PRJNA924812				IDBA	1.1.3	0.0392476	Illumina MiSeq				CH_68_sub.faa
PRJNA924812				IDBA	1.1.3	2.70296	Illumina MiSeq				CH_70.faa
PRJNA924812				IDBA	1.1.3	0.0473875	Illumina MiSeq				CH_71.faa
PRJNA924812				IDBA	1.1.3	0.0361764	Illumina MiSeq				CH_73.faa
PRJNA924812				IDBA	1.1.3	0.57351	Illumina MiSeq				CH_73_sub.faa
PRJNA924812				IDBA	1.1.3	0.128492	Illumina MiSeq				CH_74.faa
PRJNA924812				IDBA	1.1.3	0.0510886	Illumina MiSeq				CH_75.faa
PRJNA924812				IDBA	1.1.3	0.363895	Illumina MiSeq				CH_76.faa
PRJNA924812				IDBA	1.1.3	0.0830025	Illumina MiSeq				CH_80.faa
PRJNA924812				IDBA	1.1.3	0.0705897	Illumina MiSeq				CH_81.faa
PRJNA924812				IDBA	1.1.3	0.211001	Illumina MiSeq				CH_84.faa
PRJNA924812				IDBA	1.1.3	0.48284	Illumina MiSeq				CH_85.faa
PRJNA924812				IDBA	1.1.3	0.0478692	Illumina MiSeq				CH_86.faa
PRJNA924812				IDBA	1.1.3	0.0269488	Illumina MiSeq				CH_87_sub.faa
PRJNA924812				IDBA	1.1.3	0.0302176	Illumina MiSeq				CH_88.faa
PRJNA924812				IDBA	1.1.3	0.148216	Illumina MiSeq				CH_89_sub.faa
PRJNA924812				IDBA	1.1.3	0.0398743	Illumina MiSeq				CH_8.faa
PRJNA924812				IDBA	1.1.3	0.0548988	Illumina MiSeq				CH_8_sub.faa
PRJNA924812				IDBA	1.1.3	0.097311	Illumina MiSeq				CH_91_sub.faa
PRJNA924812				IDBA	1.1.3	0.0405923	Illumina MiSeq				CH_93.faa
PRJNA924812				IDBA	1.1.3	0.161211	Illumina MiSeq				CH_94.faa
PRJNA924812				IDBA	1.1.3	0.0317591	Illumina MiSeq				CH_94_sub.faa
PRJNA924812				IDBA	1.1.3	0.0942497	Illumina MiSeq				CH_95_sub.faa

## Sheet: S2_GTDB
	Domain	Phyla	Class	Order	Family	Genus	Species
CH_159	Archaea	Halobacterota	Methanosarcinia	Methanosarcinales	ANME-2c	UBA203	UBA203		Archaea
CH_39	Archaea	Nanoarchaeota	Nanoarchaeia	Woesearchaeales	SM23-78	SM23-78	-		Bacteria
CH_134	Archaea	Nanoarchaeota	Nanoarchaeia	Woesearchaeales	UBA9642	-	-
CH_67_sub	Archaea	Nanoarchaeota	Nanoarchaeia	Woesearchaeales	CG1-02-33-12	CG1-02-33-12	-
CH_50	Archaea	Nanoarchaeota	Nanoarchaeia	Pacearchaeales	GW2011-AR1	GW2011-AR13	-
CH_2_sub	Archaea	Nanoarchaeota	Nanoarchaeia	Pacearchaeales	GW2011-AR1	-	-
CH_89_sub	Archaea	Nanoarchaeota	Nanoarchaeia	Pacearchaeales	-	-	-
CH_76	Archaea	Aenigmarchaeota	Aenigmarchaeia	Aenigmarchaeales	-	-	-
CH_73_sub	Archaea	Aenigmarchaeota	Aenigmarchaeia	-	-	-	-
CH_155	Archaea	Halobacterota	Methanosarcinia	Methanosarcinales	ANME-2c	UBA203	-
CH_160	Archaea	Thermoplasmatota	E2	JdFR-43	JdFR-43	-	-
CH_202	Archaea	Thermoplasmatota	E2	JdFR-43	JdFR-43	-	-
CH_27	Archaea	Thermoplasmatota	E2	JdFR-43	JdFR-43		-
CH_88	Archaea	Crearchaeota	Bathyarchaeia	TCS64	TCS64	-	-
CH_32_sub	Archaea	Crearchaeota	Bathyarchaeia	TCS64	TCS64	-	-
CH_197	Archaea	Asgardarchaeota	Lokiarchaeota	CR-4	-	-	-
CH_54_sub	Bacteria	Fusobacteriota	Fusobacteriia	Fusobacteriales	Fusobacteriaceae	Psychrilyobacter	Psychrilyobacter sp002084825
CH_175	Bacteria	-	-	-	-	-	-
CH_52_sub	Bacteria	Firmicutes	Clostridia	Acetivibrionales	-	-	-
CH_100	Bacteria	Firmicutes	Clostridia	Tissierellales	Dethiosulfatibacteraceae	Dethiosulfatibacter	-
CH_49	Bacteria	Actinobacteriota	Acidimicrobiia	UBA5794	UBA5794	UBA5794	-
CH_85	Bacteria	Patescibacteria	Paceibacteria	UBA6257	UBA6257	-	-
CH_84	Bacteria	Patescibacteria	Paceibacteria	Paceibacterales	GBS-2	-	-
CH_122	Bacteria	Patescibacteria	Paceibacteria	Paceibacterales	PEYH01	-	-
CH_13	Bacteria	Patescibacteria	ABY1	Buchananbacterales	UBA6539	-	-
CH_115	Bacteria	Patescibacteria	ABY1	UBA2591	UBA6264	UBA6264	-
CH_36	Bacteria	Patescibacteria	Microgenomatia	UBA1400	MFAQ01	-	-
CH_135	Bacteria	Chloroflexota	Dehalococcoidia	SC72	SC72	UBA9296	-
CH_19	Bacteria	Chloroflexota	Dehalococcoidia	Dehalococcoidales	UBA3254	-	-
CH_140	Bacteria	Chloroflexota	Dehalococcoidia	Dehalococcoidales	UBA5760	-	-
CH_22	Bacteria	Chloroflexota	Dehalococcoidia	GIF9	AB-539-J10	CG2-30-46-19	-
CH_144	Bacteria	Chloroflexota	Dehalococcoidia	GIF9	-	-	-
CH_73	Bacteria	Chloroflexota	Anaerolineae	Anaerolineales	Anaerolineaceae	Brevefilum	-
CH_21	Bacteria	Chloroflexota	Anaerolineae	Anaerolineales	UBA11858	-	-
CH_142	Bacteria	Chloroflexota	Anaerolineae	Anaerolineales	-	-	-
CH_16	Bacteria	UBP7_A	4484-113	4484-113	4484-113	-	-
CH_200	Bacteria	Thermotogota	Thermotogae	Petrotogales	Kosmotogaceae	Kosmotoga_B	-
CH_74	Bacteria	Bipolaricaulota	Bipolaricaulia	UBA7950	UBA7950	UBA9294	-
CH_198_sub	Bacteria	Bipolaricaulota	Bipolaricaulia	UBA7950	UBA7950	-	-
CH_94	Bacteria	Bipolaricaulota	Bipolaricaulia	UBA7950	UBA7950	-	-
CH_64_sub	Bacteria	Caldisericota	Caldisericia	Caldisericales	Caldisericaceae	UBA646	-
CH_70	Bacteria	Caldatribacteriota	JS1	SB-45	34-128	34-128	-
CH_94_sub	Bacteria	Planctomycetota	Phycisphaerae	SG8-4	SG8-4	PLanc-01	-
CH_87_sub	Bacteria	Planctomycetota	Phycisphaerae	SG8-4	SG8-4	SG8-4	-
CH_149	Bacteria	Planctomycetota	Phycisphaerae	SG8-4	SG8-4	SG8-4	-
CH_53_sub	Bacteria	Planctomycetota				-	-
CH_47_sub	Bacteria	UBP7	-	-	-	-	-
CH_71	Bacteria	Bacteroidota	Bacteroidia	Bacteroidales	Prolixibacteraceae	-	-
CH_172	Bacteria	Bacteroidota	Bacteroidia	Bacteroidales	Prolixibacteraceae	-	-
CH_23	Bacteria	Bacteroidota	Bacteroidia	Bacteroidales	vadinHA17	UBA9300	-
CH_178	Bacteria	Bacteroidota	Bacteroidia	Bacteroidales	vadinHA17	-	-
CH_8	Bacteria	Bacteroidota	Bacteroidia	Bacteroidales	ML635J-15	Bact-19	-
CH_3_sub	Bacteria	Bacteroidota	Bacteroidia	Bacteroidales	GFW2-38-335	-	-
CH_139	Bacteria	Bacteroidota	Bacteroidia	Bacteroidales	UBA12170	UBA12170	-
CH_2	Bacteria	Bacteroidota	Bacteroidia	Bacteroidales	UBA12170	-	-
CH_91_sub	Bacteria	Bacteroidota	Bacteroidia	Flavobacteriales	Flavobacteriaceae	-	-
CH_144_sub	Bacteria	KSB1	UBA2214	UBA2214	-	-	-
CH_180	Bacteria	Calditrichota	Calditrichia	RBG-13-44-9	RBG-13-44-9	-	-
CH_34	Bacteria	Marinisomatota	AB16	AB16	46-47	46-47	-
CH_81	Bacteria	Marinisomatota	UBA2242	UBA2242	UBA2242	-	-
CH_37	Bacteria	Delongbacteria	UBA4055	UBA4055	UBA4055	-	-
CH_42	Bacteria	Fibrobacterota	Chitinivibriona	Chitinvibrionales	-	-	-
CH_24	Bacteria	Cloacimonadota	Cloacimonadia	JGIOTU-2	JGIOTU-2	-	-
CH_173	Bacteria	Krumholzibacteriota	Krumholzibacteriota	SSS58A	-	-	-
CH_103	Bacteria	Eisenbacteria	RBG-16-71-46	-	-	-	-
CH_86	Bacteria	Zixibacteria	MSB-5A5	GN15	PGXB01	PGXB01	-
CH_45	Bacteria	Zixibacteria	MSB-5A5	GN15	2023-02-12	-	-
CH_12	Bacteria	Zixibacteria	MSB-5A5	GN15	2023-02-12	-	-
CH_10	Bacteria	Hydrogenedentota	Hydrogenedentia	Hydrogenedentiales	-	-	-
CH_15_sub	Bacteria	UBP6	UBA1177	UBA1177	UBA1177	-	-
CH_55_sub	Bacteria	Desulfobacterota	Desulfobacteria	Desulfobacterales	UBA2156	-	-
CH_95_sub	Bacteria	Desulfobacterota	Desulfobacteria	Desulfobacterales	BuS5	BuS5	-
CH_15	Bacteria	Desulfobacterota	Desulfobacteria	Desulfobacterales	Desulosarcinaceae	UBA2174	-
CH_137_sub	Bacteria	Desulfobacterota	Desulfobacteria	Desulfobacterales	Desulosarcinaceae	Desulfobacula	-
CH_141_sub	Bacteria	Desulfobacterota	Desulfobacteria	Desulfobacterales	Desulosarcinaceae	Desulfobacula	-
CH_101_sub	Bacteria	Desulfobacterota	Desulfobacteria	Desulfobacterales	Desulosarcinaceae	Desulfobacula	-
CH_179	Bacteria	Desulfobacterota	Desulfobacteria	Desulfobacterales	Desulosarcinaceae	-	-
CH_140_sub	Bacteria	Desulfobacterota	Desulfobacteria	Desulfobacterales	Desulosarcinaceae	-	-
CH_30	Bacteria	Desulfobacterota	Desulfobacteria	Desulfobacterales	Desulosarcinaceae	-	-
CH_93	Bacteria	Desulfobacterota	Desulfobacteria	Desulatiglandales	NaphS2	-	-
CH_166	Bacteria	Desulfobacterota	Desulfobacteria	Desulatiglandales	-	-	-
CH_51	Bacteria	Desulfobacterota	Syntrophia	Syntrophales	UBA2210	-	-
CH_123_sub	Bacteria	Desulfobacterota	Desulfomonilia	UBA1062	UBA1062	-	-
CH_75	Bacteria	Desulfobacterota	Desulfomonilia	UBA1062	UBA1062		-
CH_174_sub	Bacteria	Acidobacteriota	Aminicenantia	Aminicenantales	Aminicenantaceae	Aminicenans	-
CH_165_sub	Bacteria	Acidobacteriota	Aminicenantia	Aminicenantales	Aminicenantaceae	-	-

## Sheet: S3_RelativeAbundance_CoverM
			Environmental Core	No Sulfate 30	No Sulfate 4	No Sulfate 4 S74	Sulfate 30	Sulfate 30 S91	Sulfate 30 S124	Sulfate 4	Pulled fastq
Genome	Domain	Phyla	AHD_AM_LC_28_S127_L006_pair_HQ.fastq Relative Abundance (%)	AHD_NS30-A_S133_L006_pair_HQ.fastq Relative Abundance (%)	AHD_NS4-B_S90_L004_pair_HQ.fastq Relative Abundance (%)	AHD_NS4-C_S74_L003_pair_HQ.fastq Relative Abundance (%)	AHD_S30-A_S75_L003_pair_HQ.fastq Relative Abundance (%)	AHD_S30-B_S91_L004_pair_HQ.fastq Relative Abundance (%)	AHD_S30-C_S124_L006_pair_HQ.fastq Relative Abundance (%)	AHD_S4-C_S92_L004_pair_HQ.fastq Relative Abundance (%)	ChapelHill.fastq Relative Abundance (%)
unmapped	unmapped	unmapped	72.4887	68.876	76.8074	76.1744	65.4221	78.9721	81.0658	79.2355	74.7507
CH_55_sub	Bacteria	Desulfobacterota	3.38788	0.216773	2.46146	2.52999	0.0918908	0.0832876	0.0810197	1.91849	1.26355
CH_70	Bacteria	Caldatribacteriota	2.96457	6.16056	3.7034	4.03701	4.28458	2.18704	1.8869	1.98579	3.49488
CH_155	Archaea	Halobacterota	2.40403	1.05561	2.10531	2.1506	0.674387	0.221064	0.216294	1.1277	1.22381
CH_159	Archaea	Halobacterota	2.36599	0.327651	1.60498	1.68483	0.179777	0.0760209	0.0700997	1.20796	0.894286
CH_101_sub	Bacteria	Desulfobacterota	0.724373	0.0268779	0.55337	0.322675	0.0432188	0.0403591	0.0455409	0.348167	0.244787
CH_8	Bacteria	Bacteroidota	0.712744	0	0.0590444	0.0880372	0.0152857	0.0233914	0.0286709	0.128659	0.12721
CH_67_sub	Archaea	Nanoarchaeota	0.598953	0.654347	0.635405	0.700729	0.137764	0.162164	0.154647	0.272996	0.410376
CH_3_sub	Bacteria	Bacteroidota	0.598661	0.0651975	0.479273	0.508248	0.0783439	0.0631666	0.0682776	0.205794	0.248695
CH_91_sub	Bacteria	Bacteroidota	0.576191	0.118625	0.421983	0.394632	0.326502	0.177208	0.1628	1.09955	0.374629
CH_198_sub	Bacteria	Bipolaricaulota	0.5598	0	0.578622	0.647628	0.0166231	0.0237554	0.0260535	0.553838	0.278514
CH_95_sub	Bacteria	Desulfobacterota	0.477514	0.0642654	0.521998	0.296139	0.0953048	0.0767815	0.0750672	2.27649	0.4009
CH_54_sub	Bacteria	Fusobacteriota	0.445042	0.0320763	0.274898	0.335774	0.0310546	0.0575553	0.0461379	0.091591	0.158937
CH_137_sub	Bacteria	Desulfobacterota	0.417163	0.0462457	0.873429	0.638409	0.138556	0.0573242	0.0596694	0.814857	0.348045
CH_141_sub	Bacteria	Desulfobacterota	0.365352	0.0451747	0.302974	0.236133	0.0773751	0.0483522	0.0521512	0.293905	0.165863
CH_64_sub	Bacteria	Caldisericota	0.35661	0.87626	0.399318	0.430402	1.04525	0.530404	0.444316	0.218376	0.562894
CH_52_sub	Bacteria	Firmicutes	0.306803	0.0300341	0.253112	0.266586	0.0539553	0.0386321	0.0371051	0.336986	0.152598
CH_2	Bacteria	Bacteroidota	0.304876	0.0145034	0.165418	0.160803	0.0212202	0.0266098	0.030565	0.501686	0.133678
CH_100	Bacteria	Firmicutes	0.291974	0.0165398	0.169498	0.177386	0.0164715	0.0222071	0.0260199	0.0644345	0.0941533
CH_139	Bacteria	Bacteroidota	0.287327	0.0128205	0.154741	0.165129	0.0174092	0.024434	0.0288713	0.515556	0.130872
CH_123	Bacteria	Acidobacteriota	0.270951	0.46361	0.17277	0.185257	0.162305	0.107141	0.10742	0.0439134	0.195628
CH_84	Bacteria	Patescibacteria	0.267467	0.120092	0.196003	0.206796	0.0368339	0.0393822	0.0459375	0.0795494	0.120993
CH_179	Bacteria	Desulfobacterota	0.262089	0.0199101	0.220733	0.257238	0.0267953	0.0312861	0.0371683	0.245654	0.127201
CH_12	Bacteria	Zixibacteria	0.258248	0.0580782	0.195611	0.194026	0.0311633	0.0406276	0.0491366	0.116087	0.112137
CH_37	Bacteria	Delongbacteria	0.253253	0.0145028	0.265194	0.257419	0.0198194	0.0258586	0.030443	0.725954	0.171018
CH_173	Bacteria	Krumholzibacteriota	0.246985	0.0139217	0.275511	0.329492	0	0.037433	0.048058	0.153915	0.131174
CH_80	Bacteria	Acidobacteriota	0.238003	0.533574	0.160917	0.171467	0.355117	0.182378	0.157468	0.0550965	0.244393
CH_2_sub	Archaea	Nanoarchaeota	0.23321	1.68521	0.19431	0.205536	1.28958	0.500897	0.397475	0.115118	0.633459
CH_178	Bacteria	Bacteroidota	0.231056	2.76452	0.178103	0.196537	2.28073	0.807991	0.675094	0.0560932	1.00115
CH_15_sub	Bacteria	UBP6	0.229078	0	0.177039	0.221053	0.0163109	0.0252076	0.0307447	0.198002	0.105165
CH_24	Bacteria	Cloacimonadota	0.228459	0.269737	0.209246	0.226103	0.311607	0.261366	0.236437	0.168955	0.237514
CH_50	Archaea	Nanoarchaeota	0.226237	0.923324	0.184645	0.196357	1.72247	0.698081	0.585379	0.167185	0.637023
CH_165_sub	Bacteria	Acidobacteriota	0.221371	0.0691302	0.235159	0.262957	0.0487027	0.0399522	0.0397699	0.174856	0.130084
CH_30	Bacteria	Desulfobacterota	0.202954	0.0333342	0.145963	0.106076	1.53865	0.089153	0.0718721	0.611974	0.384163
CH_103	Bacteria	Eisenbacteria	0.200157	0.0211119	0.182996	0.192554	0.0199173	0.0588654	0.0760915	0.174339	0.105858
CH_174_sub	Bacteria	Acidobacteriota	0.188545	0.340502	0.155101	0.158354	0.139851	0.154192	0.116385	0.0681662	0.167694
CH_86	Bacteria	Zixibacteria	0.187464	0.308439	0.15194	0.162528	0.163656	0.0834162	0.0847766	0.0486919	0.153823
CH_94_sub	Bacteria	Planctomycetota	0.186619	0.287651	0.133088	0.145604	0.273909	0.15617	0.181348	0.0572141	0.181758
CH_197	Archaea	Asgardarchaeota	0.177231	0.157112	0.156424	0.148361	0.0418593	0.0357329	0.0394388	0.106079	0.105247
CH_94	Bacteria	Bipolaricaulota	0.175008	0.523997	0.111678	0.127467	0.285143	0.328091	0.305258	0.0432309	0.241208
CH_85	Bacteria	Patescibacteria	0.171356	0.261726	0.16844	0.183571	0.573833	0.204458	0.161546	0.0930393	0.242288
CH_74	Bacteria	Bipolaricaulota	0.168218	0.122608	0.172989	0.201048	0.575599	0.322052	0.249214	0.155788	0.252742
CH_73	Bacteria	Chloroflexota	0.165272	0.121185	0.154249	0.161407	0.126045	0.0847827	0.0768159	0.174303	0.129254
CH_45	Bacteria	Zixibacteria	0.152062	0.0766078	0.130731	0.132308	0.018486	0.0305504	0.0379231	0.066071	0.0775494
CH_22	Bacteria	Chloroflexota	0.14894	0.387728	0.133539	0.151226	0.0330789	0.0358437	0.0403986	0.0305304	0.124279
CH_51	Bacteria	Desulfobacterota	0.148717	0.0209646	0.172859	0.219352	0.0291405	0.0291273	0.0326953	0.111069	0.0906699
CH_89_sub	Archaea	Nanoarchaeota	0.148706	0.690623	0.103631	0.112679	0.296357	0.136346	0.127896	0.108179	0.228474
CH_160	Archaea	Thermoplasmatota	0.137566	0	0.152549	0.172577	0.01599	0.019052	0	0.261927	0.0884488
CH_123_sub	Bacteria	Desulfobacterota	0.13454	0.418959	0.0878791	0.0916035	0.413482	0.139019	0.133137	0.0553892	0.198756
CH_49	Bacteria	Actinobacteriota	0.133015	0.0794965	0.124014	0.125818	0.128467	0.074695	0.0773358	0.227803	0.115135
CH_93	Bacteria	Desulfobacterota	0.13177	0.0668064	0.0716477	0.0689315	0.0374999	0.280015	0.27716	0.0786825	0.112886
CH_32_sub	Archaea	Crearchaeota	0.125392	0.0770284	0.0896133	0.0953087	0.0689188	0.0356001	0.0340824	0.0860159	0.0752284
CH_81	Bacteria	Marinisomatota	0.122714	0.264027	0.0895728	0.0933492	0.391651	0.30466	0.284203	0.0671655	0.205815
CH_75	Bacteria	Desulfobacterota	0.12065	0.170406	0.101351	0.107145	0.173432	0.0698233	0.0753514	0.0331427	0.1107
CH_140	Bacteria	Chloroflexota	0.120544	0.260249	0.0988184	0.109087	0.203371	0.132678	0.115678	0.0534094	0.141306
CH_115	Bacteria	Patescibacteria	0.116968	0.180717	0.0739092	0.0808893	0.137931	0.146378	0.128758	0.0914476	0.118438
CH_87_sub	Bacteria	Planctomycetota	0.114673	0.124832	0.0729724	0.0778142	0.177725	0.1158	0.122254	0.0511372	0.108131
CH_36	Bacteria	Patescibacteria	0.108372	0.0512414	0.121492	0.113519	0.256524	0.92466	0.807964	0.160873	0.285348
CH_68_sub	Bacteria	Acidobacteriota	0.105663	0.299345	0.103266	0.109766	0.0510858	0.0358764	0.0364499	0.040904	0.101085
CH_15	Bacteria	Desulfobacterota	0.101757	0.372624	0.059437	0.060182	1.00146	0.612592	0.578842	0.0848517	0.374151
CH_23	Bacteria	Bacteroidota	0.0988169	0.751398	0.0744815	0.0783367	1.20534	0.481777	0.446367	0.0454423	0.434873
CH_27	Archaea	Thermoplasmatota	0.0958954	0.377108	0.0661831	0.0750299	0.155407	0.163015	0.141047	0.0301829	0.14252
CH_71	Bacteria	Bacteroidota	0.0947309	0.116191	0.0614216	0.0626909	0.297007	0.11306	0.0975007	0.0648565	0.119792
CH_47_sub	Bacteria	UBP7	0.0907192	0.553777	0.0632947	0.0657451	0.433693	0.23163	0.179883	0.028178	0.222684
CH_149	Bacteria	Planctomycetota	0.0873736	0.664747	0.0601473	0.0673359	0.0330556	0.0449766	0.0542233	0.0473242	0.140435
CH_122	Bacteria	Patescibacteria	0.0846951	0.0293905	0.0567929	0.0587508	0.301592	0.266814	0.208373	0.057473	0.133436
CH_180	Bacteria	Calditrichota	0.0801696	0.238031	0.0491517	0.0542272	0.182758	0.144707	0.142296	0.0490896	0.120072
CH_200	Bacteria	Thermotogota	0.0780177	0.248077	0.0533668	0.0619312	1.14762	0.514971	0.454356	0.0347271	0.350682
CH_21	Bacteria	Chloroflexota	0.0776722	0.777073	0.0866791	0.0914821	1.23353	0.945941	0.860594	0.114434	0.540613
CH_13	Bacteria	Patescibacteria	0.0774155	0.407025	0.0502951	0.0551797	0.0224729	0.0308971	0.0386704	0.0607345	0.0963416
CH_5	Bacteria	Omnitrophota	0.0769663	0.383436	0.0542929	0.0609183	0.0161568	0.0272524	0.0313108	0.0290784	0.0892462
CH_53_sub	Bacteria	Planctomycetota	0.0768509	0.0707624	0.044676	0.0486626	0.250306	0.160244	0.195725	0.0449703	0.111254
CH_172	Bacteria	Bacteroidota	0.0756731	0.161394	0.0442792	0.0490658	0.26126	0.146712	0.129471	0.051006	0.119736
CH_135	Bacteria	Chloroflexota	0.0737591	0.171601	0.0650918	0.0717325	0.309699	0.134231	0.12514	0.0694257	0.134007
CH_144	Bacteria	Chloroflexota	0.0684474	0.157258	0.056309	0.0618185	0.148622	0.101315	0.0960849	0.0233497	0.0920234
CH_140_sub	Bacteria	Desulfobacterota	0.0676306	0	0.0434142	0.0386099	0.02293	0.782031	0.618758	0.0727906	0.178121
CH_8_sub	Bacteria	Omnitrophota	0.0667531	0.131849	0.0435532	0.04469	0.0509804	0.370034	0.596183	0.0619514	0.143592
CH_134	Archaea	Nanoarchaeota	0.0648995	0.160771	0.0367669	0.040432	0.153868	0.0732897	0.0813584	0.0423195	0.0848776
CH_34	Bacteria	Marinisomatota	0.0607808	0.140183	0.0435727	0.0433634	0.16033	0.161758	0.155612	0.044916	0.10085
CH_142	Bacteria	Chloroflexota	0.0603217	0.290612	0.0490441	0.0541858	0.128131	0.117532	0.127038	0.0270915	0.109498
CH_76	Archaea	Aenigmarchaeota	0.0601924	0.0314092	0.0353777	0.038501	0.605637	1.05404	0.863743	0.0515734	0.325442
CH_39	Archaea	Nanoarchaeota	0.059277	0.352223	0.0395493	0.045482	0.632743	0.191795	0.140604	0.038731	0.210312
CH_166	Bacteria	Desulfobacterota	0.0550528	0.014008	0.0281596	0.0273488	0.426183	0.251841	0.21497	0.0408042	0.137666
CH_175	Bacteria	Novel Bacteria	0.0521288	0.0461578	0.0302705	0.0355991	1.40297	0.73254	0.662318	0.0385116	0.39852
CH_88	Archaea	Crearchaeota	0.0505549	0.103283	0.0369167	0.0396153	0.209808	0.0899053	0.0848951	0.0332442	0.0856117
CH_202	Archaea	Thermoplasmatota	0.0503995	0.230469	0.0345204	0.039255	0.498623	0.55992	0.444784	0.0224581	0.237322
CH_19	Bacteria	Chloroflexota	0.0501062	0.119393	0.0398536	0.0449021	0.385079	0.128987	0.109475	0.0289103	0.124112
CH_42	Bacteria	Fibrobacterota	0.0434587	0.0482639	0.0246925	0.0268874	0.214716	0.112366	0.108738	0.0341619	0.0794251
CH_144_sub	Bacteria	KSB1	0.0419318	0.142862	0.0232281	0.0256216	0.327885	0.155773	0.142933	0.0285396	0.118557
CH_58_sub	Bacteria	Omnitrophota	0.0402466	0.396446	0.025187	0.0291715	0.0103523	0.0885065	0.0903508	0.0220907	0.0898327
CH_73_sub	Archaea	Aenigmarchaeota	0.0396266	0.89618	0.0292115	0.0385543	2.08527	0.773483	0.608024	0.0215152	0.629748
CH_130	Bacteria	Omnitrophota	0.0358115	0.0699475	0.0218211	0.024308	0.254212	0.104327	0.0885682	0	0.0834361
CH_10	Bacteria	Hydrogenedentota	0.0354441	0.356044	0	0.0171731	0.014542	0.255587	0.221293	0	0.112879
CH_16	Bacteria	UBP7_A	0.0323882	0.0681319	0.0173505	0.0191102	0.175651	0.139672	0.119926	0	0.0756849

## Sheet: S4_38_Methanogenesis_Marker_arC
Function	Marker gene	arCOG		TGRFAM	COG correspondence	Description	Download link
MCR	m1_mcrA	arCOG04857			COG4058	Methyl-coenzyme M reductase, alpha subunit	http://eggnogapi.embl.de/nog_data/text/fasta/arCOG04857
	m2_mcrB	arCOG04860			COG4054	Methyl-coenzyme M reductase, beta subunit	http://eggnogapi.embl.de/nog_data/text/fasta/arCOG04860
	m3_mcrG	arCOG04858			COG4057	Methyl-coenzyme M reductase gamma subunit	http://eggnogapi.embl.de/nog_data/text/fasta/arCOG04858
Unkown	m4_Predicted rotamase	arCOG04900	3	TIGR03268	COG4020	Peptidyl-prolyl cis-trans isomerase related protein (UPF0285 protein)	http://eggnogapi.embl.de/nog_data/text/fasta/arCOG04900
	m5_DUF2102	arCOG04901	6	TIGR03272	COG4029	Conserved hypothetical protein (Methanogenesis marker protein 6)	http://eggnogapi.embl.de/nog_data/text/fasta/arCOG04901
	m6_DUF2112	arCOG04903	5	TIGR03271	COG4050	Conserved hypothetical protein (methanogenesis marker protein 5)	http://eggnogapi.embl.de/nog_data/text/fasta/arCOG04903
	m7_YjiL-like	arCOG02679	15	TIGR03286	COG1924	CoA-substrate-specific enzyme activase (methanogenesis marker protein 15)	http://eggnogapi.embl.de/nog_data/text/fasta/arCOG02679
	m8_DUF2113	arCOG04904	17	TIGR03291	COG4051	Conserved hypothetical protein (methanogenesis marker protein 17)	http://eggnogapi.embl.de/nog_data/text/fasta/arCOG04904
	m9_arCOG03226	arCOG03226	7	TIGR03274	COG4052	Methyl-coenzyme M reductase II operon associated protein (MrtC) (methanogenesis marker protein 7)	http://eggnogapi.embl.de/nog_data/text/fasta/arCOG03226
F430 bioS and activation	m10_atwA	arCOG00185					http://eggnogapi.embl.de/nog_data/text/fasta/arCOG00185
	m11_mcrC	arCOG03225			COG4056	Methyl coenzyme M reductase I operon protein C	http://eggnogapi.embl.de/nog_data/text/fasta/arCOG03225
	m12_mcrD	arCOG04859			COG4055	Methyl-coenzyme M reductase, operon protein D	http://eggnogapi.embl.de/nog_data/text/fasta/arCOG04859
	m13_cfbD	arCOG04888	13	TIGR03282	COG2710	Nitrogenase molybdenum-iron protein related (NflD) (Methanogenesis marker 13 metalloprotein)	http://eggnogapi.embl.de/nog_data/text/fasta/arCOG04888
	m14_cfbE	arCOG02822			COG0770	UDP-N-acetylmuramyl pentapeptide synthase related protein (MurF)	http://eggnogapi.embl.de/nog_data/text/fasta/arCOG02822
Unkown	m15_mtxX	arCOG00854	4	TIGR03270	COG4002	Methyltransferase related protein (MtxX) (methanogen marker protein 4)	http://eggnogapi.embl.de/nog_data/text/fasta/arCOG00854
	m16_AIR synthase-related	arCOG00640	2	TIGR03267	COG2144	Selenophosphate synthetase-related proteins (methanogenesis marker protein 2)	http://eggnogapi.embl.de/nog_data/text/fasta/arCOG00640
	m17_Zn-ribbon protein	arCOG01116	11	TIGR03280	COG1571	Predicted DNA-binding protein containing a Zn-ribbon domain (Methanogenesis marker protein 11)	http://eggnogapi.embl.de/nog_data/text/fasta/arCOG01116
	m18_DUF2099	arCOG04893	8	TIGR03275	COG4022	Conserved hypothetical protein (Methanogenesis marker protein 8)	http://eggnogapi.embl.de/nog_data/text/fasta/arCOG04893
	m19_DUF2117	arCOG03231					http://eggnogapi.embl.de/nog_data/text/fasta/arCOG03231
PTM	m20_Arg271-methylase (McrA PTM)	arCOG02882	1	TIGR03266	COG1944	Conserved hypothetical protein (methanogenesis marker protein 1)	http://eggnogapi.embl.de/nog_data/text/fasta/arCOG02882
	m21_DUF2124	arCOG04847					http://eggnogapi.embl.de/nog_data/text/fasta/arCOG04847
	m22_DUF2098	arCOG04846			COG4014	Uncharacterized protein conserved in archaea (DUF2098)	http://eggnogapi.embl.de/nog_data/text/fasta/arCOG04846
	m23_Soluble P-type ATPase	arCOG01579					http://eggnogapi.embl.de/nog_data/text/fasta/arCOG01579
	m24_DUF2111	arCOG04902					http://eggnogapi.embl.de/nog_data/text/fasta/arCOG04902
	m25_arCOG04853	arCOG04853	9	TIGR03277	COG4008	Predicted metal-binding transcription factor (Methanogenesis marker protein 9)	http://eggnogapi.embl.de/nog_data/text/fasta/arCOG04853
	m26_DUF2114	arCOG04866	14	TIGR03285	COG4065	Conserved hypothetical protein (Methanogenesis marker protein 14)	http://eggnogapi.embl.de/nog_data/text/fasta/arCOG04866
MTR	m27_mtrA	arCOG03221					http://eggnogapi.embl.de/nog_data/text/fasta/arCOG03221
	m28_mtrB	arCOG04867			COG4062	N5-methyltetrahydromethanopterin: coenzyme M methyltransferase, subunit B (EC 2.1.1.86) (MtrB)	http://eggnogapi.embl.de/nog_data/text/fasta/arCOG04867
	m29_mtrC	arCOG04868			COG4061	N5-methyltetrahydromethanopterin: coenzyme M methyltransferase, subunit C (EC 2.1.1.86) (MtrC)	http://eggnogapi.embl.de/nog_data/text/fasta/arCOG04868
	m30_mtrD	arCOG04869			COG4060	N5-methyltetrahydromethanopterin: coenzyme M methyltransferase, subunit D (EC 2.1.1.86) (MtrD)	http://eggnogapi.embl.de/nog_data/text/fasta/arCOG04869
	m31_mtrE	arCOG04870			COG4059	N5-methyltetrahydromethanopterin: coenzyme M methyltransferase, subunit E (EC 2.1.1.86) (MtrE)	http://eggnogapi.embl.de/nog_data/text/fasta/arCOG04870
	m32_arCOG04885	arCOG04885	12	TIGR03281	COG4020	Conserved hypothetical protein (putative kinase) Methanogenesis marker protein 12	http://eggnogapi.embl.de/nog_data/text/fasta/arCOG04885
PTM	m33_Arg-methylase (McrA PTM)	arCOG00950	10	TIGR03278			http://eggnogapi.embl.de/nog_data/text/fasta/arCOG00950
	m34_DUF1894	arCOG04844					http://eggnogapi.embl.de/nog_data/text/fasta/arCOG04844
	m35_DUF1890	arCOG04845					http://eggnogapi.embl.de/nog_data/text/fasta/arCOG04845
	m36_DUF2115	arCOG03215					http://eggnogapi.embl.de/nog_data/text/fasta/arCOG03215
	m37_DUF2119	arCOG04894					http://eggnogapi.embl.de/nog_data/text/fasta/arCOG04894
	m38_DUF2121	arCOG03213					http://eggnogapi.embl.de/nog_data/text/fasta/arCOG03213
MCR, methyl-coenzyme M reductase complex; MTR, N5-Methyltetrahydromethanopterin: coenzyme M methyltransferase complex;PTM, involved in post-translational modification of McrA residues; F430 prosthetic group of MCR.

## Sheet: S5_38_Methanogenesis_Markers
	F430 Biosynthesis and Activation	Unknown	Unknown	PTM	Unknown	PTM	Unknown	F430 Biosynthesis and Activation	PTM	PTM	PTM	MTR	Unknown	Unknown	PTM	PTM	PTM	PTM	PTM	MCR	MCR	PTM	MTR	F430 Biosynthesis and Activation	Unknown	PTM	Unknown	Unknown	PTM	Unknown	Unknown	MCR	F430 Biosynthesis and Activation	F430 Biosynthesis and Activation	MTR	MTR	MTR	MTR	Number of Unique Markers	Raw Marker Count
Marker Gene	m10_atwA	m16_AIR synthase-related	m15_mtxX	m33_Arg-methylase (McrA PTM)	m17_Zn-ribbon protein	m23_Soluble P-type ATPase	m7_YjiL-like	m14_cfbE	m20_Arg271-methylase (McrA PTM)	m38_DUF2121	m36_DUF2115	m27_mtrA	m9_arCOG03226	m19_DUF2117	m34_DUF1894	m35_DUF1890	m22_DUF2098	m21_DUF2124	m25_arCOG04853	m1_mcrA	m2_mcrB	m26_DUF2114	m32_arCOG04885	m13_cfbD	m18_DUF2099	m37_DUF2119	m4_Predicted rotamase	m5_DUF2102	m24_DUF2111	m6_DUF2112	m8_DUF2113	m3_mcrG	m11_mcrC	m12_mcrD	m28_mtrB	m29_mtrC	m30_mtrD	m31_mtrE	Per Genome	Sum per genome
arCOG_ID	arCOG00185	arCOG00640	arCOG00854	arCOG00950	arCOG01116	arCOG01579	arCOG02679	arCOG02822	arCOG02882	arCOG03213	arCOG03215	arCOG03221	arCOG03226	arCOG03231	arCOG04844	arCOG04845	arCOG04846	arCOG04847	arCOG04853	arCOG04857	arCOG04860	arCOG04866	arCOG04885	arCOG04888	arCOG04893	arCOG04894	arCOG04900	arCOG04901	arCOG04902	arCOG04903	arCOG04904	arCOG04858	arCOG03225	arCOG04859	arCOG04867	arCOG04868	arCOG04869	arCOG04870	N/A	N/A
CH_2	66					1													1																				3	68
CH_2_sub	3															1																							2	4
CH_3_sub	84		3																										1										3	88
CH_5	60	1					3																																3	64
CH_8	65	3			3																								1										4	72
CH_8_sub	47	4																	3																				3	54
CH_10	156										1																												2	157
CH_12	91	4		1		4																																	4	100
CH_13	21																																						1	21
CH_15	177	1				2	8		9										1										3										7	201
CH_15_sub	57	2			3		12				1								1																				6	76
CH_16	44					1		1																															3	46
CH_19	79					1	3																																3	83
CH_21	177					3																																	2	180
CH_22	33	3					5																																3	41
CH_23	87	3					3												1																				4	94
CH_24	89			3				3			1								3										2										6	101
CH_27	18	8																																					2	26
CH_30	113	5				1	12	1	3		1																												7	136
CH_32_sub	14					6																																	2	20
CH_34	86	1				3		3			1								1																				6	95
CH_36	18					1																																	2	19
CH_37	79	1		3				1											2																				5	86
CH_39	20					1										1																							3	22
CH_42	104	3					12																						2										4	121
CH_45	51	5				1	3																																4	60
CH_47_sub	93	3		3		3			3		1																												6	106
CH_49	145	1				1	6																																4	153
CH_50	6					5			3		2					1																							5	17
CH_51	78	4					3	1																															4	86
CH_52_sub	136	3		3		4		2																															5	148
CH_53_sub	111				1	2	9									1													2										6	126
CH_54_sub	123					3	3	2											1																				5	132
CH_55_sub	63						3		6		1								2																				5	75
CH_58_sub	54																		1																				2	55
CH_64_sub	87						2	2																															3	91
CH_67_sub	15					4													1										1										4	21
CH_68_sub	75	4				2	3		4																														5	88
CH_70	85							4																															2	89
CH_71	68							2											3																				3	73
CH_73	246					7	1																																3	254
CH_73_sub	12					3						1				1																							4	17
CH_74	137	3				3																																	3	143
CH_75	60	5					12		3																				1										5	81
CH_76	12			1		1																																	3	14
CH_80	90							1																															2	91
CH_81	84	3		3		1		1			1																												6	93
CH_84	11																																						1	11
CH_85	9							3																															2	12
CH_86	100	6				4	3				1																												5	114
CH_87_sub	66					3			3																				2										4	74
CH_88	87	2			3	3																							3										5	98
CH_89_sub	17					1										1																							3	19
CH_91_sub	93					1	3		3															1															5	101
CH_93	162	6					6		9																														4	183
CH_94	109					3		1																															3	113
CH_94_sub	91	3				3	2																						2										5	101
CH_95_sub	117	4				9	8												1					1					2										7	142
CH_100	169	2		3	2	1		2																															6	179
CH_101_sub	195	3				1	14		1										1																				6	215
CH_103	44	1				4																																	3	49
CH_115	9					1																																	2	10
CH_122	9																																						1	9
CH_123	84	2				3	2	1	1																														6	93
CH_123_sub	82	2		1			4	1																															5	90
CH_130	45	2						4																	3														4	54
CH_134	13					1										1																							3	15
CH_135	27							5																															2	32
CH_137_sub	132	3				1	9	3	6		1																												7	155
CH_139	84	3						4																					2										4	93
CH_140	51	3				1	9																																4	64
CH_140_sub	106	5				4	29		9														1																6	154
CH_141_sub	257	4				1	12	2	3																														6	279
CH_142	230					4					1																												3	235
CH_144	48	1					3																																3	52
CH_144_sub	117	3					2																																3	122
CH_149	56					3	1												2																				4	62
CH_155	101	4	3	3	6	5	3	3	3				3	3	3	3	2	3	3	3	3	3		10	3	3	3	3		3	3								26	188
CH_159	121	6	3	3	3	2	3	3	3	3			3	3	3	3	1		3	3	3	3		13	3	3	3	3	1	3	3								27	207
CH_160	45	6				1										1													3										5	56
CH_165_sub	98							1			1																												3	100
CH_166	208	6				5	9		7																														5	235
CH_172	87							1																															2	88
CH_173	76			3			3	2																															4	84
CH_174_sub	87	1						2																															3	90
CH_175	73					4		1																															3	78
CH_178	93	4	3						1																				2										5	103
CH_179	117	4				1	8	1	4																														6	135
CH_180	92	6		3			3	1																															5	105
CH_197	46	2	3			4	4												3																				6	62
CH_198_sub	112					4																																	2	116
CH_200	162					3	3	4																															4	172
CH_202	33	2														1																							3	36

## Sheet: S6_CANT_HYD_Description
Anaerobic Alkanes		Anaerobic Aromatics		Aerobic Alkanes		Aerobic Aromatics
Gene Name	Function	Gene Name	Function	Gene Name	Function	Gene Name	Function
AssA	Alkylsuccinate Synthase	EbdA/CmdA	Ethylbenzene dehydrogenase	prmAC	Propoane monooxygenase	TmoABE	Toluene-4-monooxygenase
AhyA	Putative alkane C2 methylene hydroxylase	BssA/IbsA	Benzylsuccinate Synthase	pBmoABC/sBmoXYZ	Butane monooxygenase	MAHalpha/beta	Monoaromatic dioxygenases (alpha and beta)
		NmsA	2-Naphthylmethyl-succinate synthase	AlkB/Cyp153	Alkane hydroxylase	TomA1A3A4/DmpO	Toluene-ortho-monooxygenase/Phenol hydroxylase
		AbcA_1	Benzene carboxylase	AlmA	Flavin binding monooxygenase	NdoBC/non-NdoB	Naphthalene-1,2-dioxygenase
		AbcA_2	Benzene carboxylase	LadA/B	Long chain alkane hydroxylase	DszC	Dibenzothiophene monooxygenase
		K27540	Naphthalene carboxylase
Bold = alkane or naphthalene degradation
These searches were ran with no cutoff i.e. exploring below the noise cutoff. Trusted and noise cutoffs resulted in NO hits for any marker genes for any of the 93 MAGs

## Sheet: S7_CANT_HYD_Hits
				Full Sequence			Best Domain			Domain Number Estimation								Based on E-Value Cutoff 10^-4		Color Key:	Aerobic Alkanes	Aerobic Aromatics
MAG_ID	Phyla	Scaffold_ID	Gene_Name	E-value	score	bias	E-value	score	bias	exp	reg	clu	ov	env	dom	rep	inc	Presence/Absence			Anaerobic Alkanes	Anaerobic Aromatics
CH_2	Bacteroidota	CH_2-scaffold_6731_2	AhyA	2.4e-31	105.8	1	1.3e-19	66.9	0.1	3.5	3	1	1	4	4	4	3	1			Insignificant E-Value (larger than 10^-4)
		CH_2-scaffold_6771_8	AlkB	0.075	8.9	2.8	0.12	8.2	2.8	1.2	1	0	0	1	1	1	0	0
		CH_2-scaffold_20383_5	AlmA_GroupI	6.5e-06	22.1	0.2	0.053	9.2	0	3.1	1	1	2	3	3	3	3	1
		CH_2-scaffold_3944_2	AlmA_GroupI	0.00048	15.9	0	0.0094	11.7	0	2.2	1	1	1	2	2	2	2	0
		CH_2-scaffold_15566_9	AlmA_GroupI	0.0036	13	0	0.0054	12.4	0	1.2	1	0	0	1	1	1	1	0
		CH_2-scaffold_6528_5	AssA	1.3e-116	387.6	0	1.6e-116	387.3	0	1	1	0	0	1	1	1	1	1
		CH_2-scaffold_6528_5	BssA	5.1e-105	349.2	0	7.5e-105	348.6	0	1.2	1	0	0	1	1	1	1	1
		CH_2-scaffold_6731_2	CmdA	1.1e-18	63.7	1.3	7.8e-14	47.6	0.2	3.9	3	1	1	4	4	4	3	1
		CH_2-scaffold_2256_9	DszC	3.9e-18	62.4	0.1	1e-16	57.7	0.1	2.1	1	1	0	1	1	1	1	1
		CH_2-scaffold_2375_9	DszC	1.4e-11	40.7	0	2e-11	40.3	0	1.2	1	0	0	1	1	1	1	1
		CH_2-scaffold_44018_2	DszC	1.5e-10	37.4	0	5.1e-10	35.7	0	1.7	2	0	0	2	2	2	1	1
		CH_2-scaffold_6731_2	EbdA	1.6e-23	79.4	0.8	4.9e-15	51.3	0.1	3.3	2	1	1	3	3	3	3	1
		CH_2-scaffold_14822_8	LadB	0.013	11.4	0	0.023	10.6	0	1.4	1	0	0	1	1	1	0	0
		CH_2-scaffold_6528_5	NmsA	6.5e-98	325.7	0	9e-98	325.2	0	1.1	1	0	0	1	1	1	1	1
CH_2_sub	Nanoarchaeota	No Matches	0															0
CH_3_sub	Bacteroidota	CH_3_sub-scaffold_450_37	AbcA_1	4e-42	142	1	5.9e-41	138.2	1	2.2	1	1	0	1	1	1	1	1
		CH_3_sub-scaffold_450_37	AbcA_2	4.6e-159	527.5	9	2.7e-151	501.9	0.9	2.3	1	1	1	2	2	2	2	1
		CH_3_sub-scaffold_34532_3	AhyA	0.014	11.1	0.1	0.015	10.9	0.1	1	1	0	0	1	1	1	0	0
		CH_3_sub-scaffold_3429_12	AlkB	5.8e-07	26.3	0	5.8e-07	26.3	0	1	1	0	0	1	1	1	1	1
		CH_3_sub-scaffold_3218_5	AlmA_GroupI	1.8e-05	21.1	0.1	3.8e-05	20.1	0.1	1.5	1	0	0	1	1	1	1	1
		CH_3_sub-scaffold_4295_10	AlmA_GroupI	0.00098	15.4	0	0.0068	12.6	0	2	2	0	0	2	2	2	1	0
		CH_3_sub-scaffold_4276_3	AlmA_GroupI	0.015	11.5	0.2	0.029	10.5	0	1.5	2	0	0	2	2	2	0	0
		CH_3_sub-scaffold_3218_5	AlmA_GroupIII	0.00021	17.7	0.1	0.00034	17	0.1	1.3	1	0	0	1	1	1	1	0
		CH_3_sub-scaffold_4710_12	AssA	0.0012	14.4	1.4	0.0016	14	1.4	1	1	0	0	1	1	1	1	0
		CH_3_sub-scaffold_15365_2	DszC	9e-15	51.8	0	2.9e-13	46.8	0	2.1	1	1	0	1	1	1	1	1
		CH_3_sub-scaffold_712_5	DszC	1.2e-05	21.7	0	3.4e-05	20.3	0	1.6	2	0	0	2	2	2	1	1
		CH_3_sub-scaffold_450_37	K27540	7.2e-56	187.5	5.1	5.6e-55	184.6	1.5	2.8	1	1	0	2	2	2	2	1
		CH_3_sub-scaffold_6002_11	MAH_beta	0.0041	14.4	1.4	0.026	11.8	0.1	2.5	3	0	0	3	3	3	1	0
		CH_3_sub-scaffold_80_92	NmsA	0.0057	12.1	0	0.0085	11.6	0	1.1	1	0	0	1	1	1	1	0
CH_5	Omnitrophota	CH_5-scaffold_12040_16	AbcA_1	0.028	10	0	0.033	9.8	0	1.1	1	0	0	1	1	1	0	0
		CH_5-scaffold_11890_9	AhyA	1.7e-26	89.6	0.2	5.7e-11	38.2	0	4	3	1	1	4	4	4	4	1
		CH_5-scaffold_2679_23	AlkB	1.3	4.8	6.5	1.8	4.3	6.5	1.1	1	0	0	1	1	1	0	0
		CH_5-scaffold_5649_5	AlkB	2	4.2	8.7	2.9	3.6	8.7	1.2	1	0	0	1	1	1	0	0
		CH_5-scaffold_9941_10	AlmA_GroupI	0.0012	14.5	0	0.026	10.1	0	2.5	1	1	1	3	3	3	1	0
		CH_5-scaffold_116148_4	AlmA_GroupI	0.03	9.9	0	0.037	9.6	0	1.1	1	0	0	1	1	1	0	0
		CH_5-scaffold_26624_4	AlmA_GroupIII	0.0028	13.4	0	0.0034	13.1	0	1.1	1	0	0	1	1	1	1	0
		CH_5-scaffold_35872_1	AlmA_GroupIII	0.0041	12.8	0	0.0054	12.4	0	1.1	1	0	0	1	1	1	1	0
		CH_5-scaffold_11890_9	CmdA	3.3e-08	28.9	0	0.035	9	0	3.6	3	1	1	4	4	4	4	1
		CH_5-scaffold_32003_5	DszC	8.9e-17	57.8	0.4	7.3e-15	51.5	0.4	2.1	1	1	0	1	1	1	1	1
		CH_5-scaffold_11890_9	EbdA	4.7e-25	84.4	0	1.2e-09	33.4	0	4	3	1	1	4	4	4	4	1
CH_8	Bacteroidota	CH_8-scaffold_1713_5	AbcA_1	2.7e-36	122	0.1	7.4e-34	114	0.1	2	2	0	0	2	2	2	2	1
		CH_8-scaffold_1713_5	AbcA_2	2.6e-135	448.4	0.8	2e-130	432.3	0	2.6	1	1	1	2	2	2	2	1
		CH_8-scaffold_3465_3	AhyA	2.4e-11	39.3	0	1.5e-05	20.1	0	2.1	2	0	0	2	2	2	2	1
		CH_8-scaffold_3465_2	AhyA	4.2e-05	18.6	0	5.9e-05	18.2	0	1.1	1	0	0	1	1	1	1	1
		CH_8-scaffold_674_8	AlkB	0.018	10.8	0.5	0.019	10.7	0.5	1	1	0	0	1	1	1	0	0
		CH_8-scaffold_4497_12	AlmA_GroupI	0.0039	12.7	0.1	0.87	4.9	0	3.5	2	1	2	4	4	4	1	0
		CH_8-scaffold_572_7	AlmA_GroupI	0.0045	12.5	0.2	0.11	8	0	2.1	1	1	1	2	2	2	2	0
		CH_8-scaffold_1355_7	AlmA_GroupI	0.0047	12.4	0	0.025	10.1	0	2	2	0	0	2	2	2	1	0
		CH_8-scaffold_3465_3	CmdA	8.8e-07	24	0	0.002	12.9	0	2.1	2	0	0	2	2	2	2	1
		CH_8-scaffold_1976_10	DszC	7.7e-10	34.8	0	1.1e-09	34.3	0	1.2	1	0	0	1	1	1	1	1
		CH_8-scaffold_3465_3	EbdA	1.3e-09	33.1	0	4.3e-05	18.2	0	2	2	0	0	2	2	2	2	1
		CH_8-scaffold_1713_5	K27540	5.8e-46	154.1	0	2.6e-45	152	0	1.8	1	1	0	1	1	1	1	1
CH_8_sub	Bacteroidota	CH_8_sub-scaffold_184_46	AbcA_1	0.018	10.4	0	0.024	10	0	1.1	1	0	0	1	1	1	0	0
		CH_8_sub-scaffold_1115_25	AhyA	0.0086	10.9	1.4	0.0099	10.7	1.4	1	1	0	0	1	1	1	1	0
		CH_8_sub-scaffold_7240_2	AlkB	0.023	10.3	0	0.023	10.3	0	2.2	2	0	0	2	2	2	0	0
		CH_8_sub-scaffold_278_4	AlkB	1.3	4.5	15.4	1.8	4.1	15.4	1.2	1	0	0	1	1	1	0	0
		CH_8_sub-scaffold_6254_7	AlmA_GroupI	0.00023	16.7	0.2	0.0021	13.5	0	2.1	2	0	0	2	2	2	1	0
		CH_8_sub-scaffold_744_15	AlmA_GroupI	0.0018	13.7	0	0.0046	12.4	0	1.7	1	1	1	2	2	2	1	0
		CH_8_sub-scaffold_565_26	AlmA_GroupI	0.0071	11.8	0.5	1	4.7	0.1	2.5	2	0	0	2	2	2	2	0
		CH_8_sub-scaffold_1581_23	AlmA_GroupI	0.013	10.9	0.2	0.14	7.5	0	2.2	2	1	0	2	2	2	0	0
		CH_8_sub-scaffold_6254_7	AlmA_GroupIII	6.4e-05	18.6	0.4	0.0082	11.6	0	2.2	2	0	0	2	2	2	2	1
		CH_8_sub-scaffold_565_26	AlmA_GroupIII	0.001	14.6	0.8	0.14	7.5	0.1	2.2	2	0	0	2	2	2	2	0
		CH_8_sub-scaffold_172_31	CYP153	0.0051	12.4	0	0.0073	11.9	0	1.2	1	0	0	1	1	1	1	0
		CH_8_sub-scaffold_405_18	DszC	8.8e-19	64.2	0.1	9.5e-18	60.8	0.1	2	1	1	0	1	1	1	1	1
CH_10	Hydrogenedentota	CH_10-scaffold_233_35	AhyA	9.4e-19	64.8	0.1	2.8e-11	40.1	0	4	4	0	0	4	4	4	4	1
		CH_10-scaffold_10675_4	AlkB	2.2e-05	21.4	0	2.3e-05	21.3	0	1	1	0	0	1	1	1	1	1
		CH_10-scaffold_3269_12	AlkB	0.013	12.2	2.7	0.017	11.8	2.7	1.1	1	0	0	1	1	1	0	0
		CH_10-scaffold_22665_3	AssA	1.2e-82	276	0	1.5e-82	275.7	0	1.1	1	0	0	1	1	1	1	1
		CH_10-scaffold_1468_15	AssA	9.2e-50	167.2	0	5.2e-48	161.4	0	2.6	1	1	0	1	1	1	1	1
		CH_10-scaffold_195_15	AssA	6.4e-42	141.3	0	1.3e-36	123.8	0	2.9	2	1	0	2	2	2	2	1
		CH_10-scaffold_2201_2	AssA	1.2e-07	27.9	0	1.2e-07	27.9	0	1	1	0	0	1	1	1	1	1
		CH_10-scaffold_22665_3	BssA	6.1e-64	214.1	0	7.7e-64	213.7	0	1	1	0	0	1	1	1	1	1
		CH_10-scaffold_195_15	BssA	7.5e-40	134.4	0	3.1e-38	129	0	2.3	3	0	0	3	3	3	2	1
		CH_10-scaffold_1468_15	BssA	4e-32	108.8	0	1.1e-26	90.8	0	2.7	2	1	0	2	2	2	2	1
		CH_10-scaffold_2201_2	BssA	1.5e-06	24.2	0	1.5e-06	24.2	0	1	1	0	0	1	1	1	1	1
		CH_10-scaffold_233_35	CmdA	7.2e-07	25.3	0.4	0.00054	15.8	0.2	3.2	4	0	0	4	4	4	2	1
		CH_10-scaffold_199_30	CYP153	0.04	10.5	0	0.057	10	0	1.1	1	0	0	1	1	1	0	0
		CH_10-scaffold_1631_2	DszC	1.2e-18	64.8	0.2	1e-17	61.7	0.2	1.9	1	1	0	1	1	1	1	1
		CH_10-scaffold_6864_8	DszC	9.1e-14	48.8	0	2.3e-12	44.1	0	2	2	0	0	2	2	2	2	1
		CH_10-scaffold_883_3	DszC	6.5e-10	36.1	0	2.4e-09	34.2	0	1.8	1	1	0	1	1	1	1	1
		CH_10-scaffold_233_35	EbdA	2e-21	73.2	0.9	2.9e-13	46.2	0.1	4	3	1	1	4	4	4	4	1
		CH_10-scaffold_22665_3	NmsA	3.2e-65	218.3	0	4e-65	218	0	1	1	0	0	1	1	1	1	1
		CH_10-scaffold_195_15	NmsA	8e-44	147.5	0	4.5e-41	138.4	0	2.3	3	0	0	3	3	3	2	1
		CH_10-scaffold_1468_15	NmsA	1.6e-35	120.1	0	5.9e-26	88.4	0	2.4	2	1	0	2	2	2	2	1
		CH_10-scaffold_2201_2	NmsA	3.8e-08	29.5	0	3.8e-08	29.5	0	1	1	0	0	1	1	1	1	1
CH_12	Zixibacteria	CH_12-scaffold_15371_5	AhyA	1.9e-11	39.9	0	4.1e-07	25.6	0	2.9	2	1	1	3	3	3	3	1
		CH_12-scaffold_12264_2	AhyA	2.1e-06	23.2	0	0.0061	11.8	0	3	3	0	0	3	3	3	3	1
		CH_12-scaffold_14917_3	AhyA	0.00061	15.1	0	0.0047	12.2	0	2	2	0	0	2	2	2	1	0
		CH_12-scaffold_21473_5	AlkB	0.032	10.2	0	0.035	10.1	0	1	1	0	0	1	1	1	0	0
		CH_12-scaffold_3680_9	AlmA_GroupI	0.00043	16.1	0	0.00068	15.5	0	1.2	1	0	0	1	1	1	1	0
		CH_12-scaffold_20947_1	AssA	2.8e-73	244.3	0	3.2e-73	244.1	0	1	1	0	0	1	1	1	1	1
		CH_12-scaffold_17859_6	AssA	8.1e-54	179.9	0	1e-53	179.6	0	1.1	1	0	0	1	1	1	1	1
		CH_12-scaffold_20947_1	BssA	2.2e-60	201.6	0	2.4e-60	201.5	0	1	1	0	0	1	1	1	1	1
		CH_12-scaffold_17859_6	BssA	3.3e-55	184.4	0	5.3e-55	183.8	0	1.2	1	0	0	1	1	1	1	1
		CH_12-scaffold_15371_5	CmdA	1.2e-05	20.5	0	2.1e-05	19.7	0	1.3	1	0	0	1	1	1	1	1
		CH_12-scaffold_12264_2	CmdA	8.3e-05	17.8	0	0.017	10.1	0	2.3	2	0	0	2	2	2	2	1
		CH_12-scaffold_77341_2	DszC	3e-20	69.4	0	4.1e-20	69	0	1.1	1	0	0	1	1	1	1	1
		CH_12-scaffold_91916_2	DszC	1.5e-14	50.6	0.1	2.3e-14	50.1	0.1	1.3	1	1	0	1	1	1	1	1
		CH_12-scaffold_22977_3	DszC	1.1e-13	47.7	0	1e-11	41.3	0	2	2	0	0	2	2	2	2	1
		CH_12-scaffold_11994_3	DszC	2.2e-12	43.5	0	2.7e-12	43.2	0	1.1	1	0	0	1	1	1	1	1
		CH_12-scaffold_14516_3	DszC	0.02	10.7	4.9	0.39	6.5	0	2.8	3	0	0	3	3	3	0	0
		CH_12-scaffold_14917_3	EbdA	7.7e-06	20.9	0	0.00016	16.6	0	2.1	2	0	0	2	2	2	2	1
		CH_12-scaffold_15371_5	EbdA	1.7e-05	19.7	0	2.8e-05	19	0	1.3	1	0	0	1	1	1	1	1
		CH_12-scaffold_12264_2	EbdA	0.00024	16	0	0.039	8.7	0	2.3	2	0	0	2	2	2	2	0
		CH_12-scaffold_20947_1	NmsA	3.5e-62	207.6	0	3.8e-62	207.4	0	1	1	0	0	1	1	1	1	1
		CH_12-scaffold_17859_6	NmsA	1.4e-48	162.6	0	1.7e-48	162.3	0	1.1	1	0	0	1	1	1	1	1
		CH_12-scaffold_48166_5	TmoA_BmoA	0.0027	13.7	0	0.072	9	0	2	1	1	1	2	2	2	2	0
		CH_12-scaffold_48166_5	TomA3	0.014	11	2.4	0.14	7.7	0.1	2.1	1	1	1	2	2	2	0	0
CH_13	Patescibacteria	CH_13-scaffold_12337_10	AlmA_GroupI	2.6e-05	18.9	0	0.005	11.4	0	2.4	2	1	1	3	3	3	2	1
		CH_13-scaffold_4598_37	EbdA	0.021	8.3	0	0.027	8	0	1	1	0	0	1	1	1	0	0
CH_15	Desulfobacterota	CH_15-scaffold_1398_14	AhyA	7.3e-33	110.9	0	6e-27	91.3	0	3.5	3	1	1	4	4	4	3	1
		CH_15-scaffold_265_51	AhyA	1.4e-17	60.3	1.1	2.5e-14	49.5	0	3.2	3	0	0	3	3	3	3	1
		CH_15-scaffold_188_17	AhyA	2.7e-17	59.3	0.1	1.7e-07	26.9	0	4	3	1	1	4	4	4	4	1
		CH_15-scaffold_18_23	AhyA	2.9e-14	49.3	0	0.00017	17	0	4	3	1	1	4	4	4	4	1
		CH_15-scaffold_188_16	AhyA	0.0011	14.3	0	0.0011	14.3	0	1	1	0	0	1	1	1	1	0
		CH_15-scaffold_18_24	AhyA	0.0067	11.7	0	0.015	10.5	0	1.5	2	0	0	2	2	2	1	0
		CH_15-scaffold_149_39	AlkB	6.5e-06	22.4	0	6.5e-06	22.4	0	1	1	0	0	1	1	1	1	1
		CH_15-scaffold_3442_16	AlkB	0.0014	14.8	0	0.0014	14.8	0	1	1	0	0	1	1	1	1	0
		CH_15-scaffold_42_67	AlkB	0.31	7	3.6	0.51	6.3	3.6	1.2	1	0	0	1	1	1	0	0
		CH_15-scaffold_190_5	AlmA_GroupI	0.00018	17.5	0	0.00023	17.1	0	1.1	1	0	0	1	1	1	1	0
		CH_15-scaffold_2094_3	AlmA_GroupI	0.0016	14.3	0	0.011	11.6	0	2.1	1	1	1	2	2	2	1	0
		CH_15-scaffold_597_12	AlmA_GroupI	0.0048	12.7	0.1	0.028	10.2	0	1.9	1	1	0	2	2	2	1	0
		CH_15-scaffold_3568_10	AlmA_GroupI	0.0072	12.2	0	0.011	11.5	0	1.3	1	0	0	1	1	1	1	0
		CH_15-scaffold_394_27	AlmA_GroupI	0.02	10.7	0.1	0.42	6.3	0	2.1	2	0	0	2	2	2	0	0
		CH_15-scaffold_276_27	AlmA_GroupI	0.081	8.7	1.5	2	4.1	0.1	3.1	3	0	0	3	3	3	0	0
		CH_15-scaffold_3568_10	AlmA_GroupIII	0.029	10.2	0	0.045	9.6	0	1.2	1	0	0	1	1	1	0	0
		CH_15-scaffold_276_27	AlmA_GroupIII	0.029	10.2	0.2	3.3	3.4	0	2.8	3	0	0	3	3	3	0	0
		CH_15-scaffold_190_5	AlmA_GroupIII	0.034	10	0	0.044	9.6	0	1.1	1	0	0	1	1	1	0	0
		CH_15-scaffold_42_38	AssA	3.1e-128	426.1	0	4.2e-128	425.7	0	1	1	0	0	1	1	1	1	1
		CH_15-scaffold_42_30	AssA	1.4e-116	387.6	0	1.7e-116	387.3	0	1	1	0	0	1	1	1	1	1
		CH_15-scaffold_4543_10	AssA	4.4e-75	250.3	0	1.2e-74	248.9	0	1.6	1	1	0	1	1	1	1	1
		CH_15-scaffold_42_38	BssA	2e-115	383.7	0	2.9e-115	383.2	0	1.1	1	0	0	1	1	1	1	1
		CH_15-scaffold_42_30	BssA	1.3e-99	331.4	0	1.7e-99	331	0	1	1	0	0	1	1	1	1	1
		CH_15-scaffold_4543_10	BssA	1.4e-72	241.9	0	2.7e-72	241	0	1.3	1	1	0	1	1	1	1	1
		CH_15-scaffold_1398_14	CmdA	3.8e-17	58.6	0	1.2e-16	57	0	1.8	2	1	0	2	2	2	1	1
		CH_15-scaffold_265_51	CmdA	3.1e-08	29.1	0	7.8e-07	24.5	0	2.3	1	1	0	1	1	1	1	1
		CH_15-scaffold_18_23	CmdA	1.3e-07	27.1	0	0.0073	11.4	0	3.1	3	0	0	3	3	3	3	1
		CH_15-scaffold_188_17	CmdA	0.00012	17.3	0	0.044	8.8	0	2.7	3	0	0	3	3	3	2	0
		CH_15-scaffold_188_16	CmdA	0.02	9.9	0	0.021	9.9	0	1	1	0	0	1	1	1	0	0
		CH_15-scaffold_2347_3	DszC	5.7e-24	81.7	6.1	1.7e-22	76.9	6.1	2	1	1	0	1	1	1	1	1
		CH_15-scaffold_1147_13	DszC	7.6e-22	74.7	0.5	1.2e-19	67.5	0.5	2.1	1	1	0	1	1	1	1	1
		CH_15-scaffold_18_68	DszC	4.3e-16	55.8	0	6.3e-16	55.2	0	1.2	1	0	0	1	1	1	1	1
		CH_15-scaffold_2240_27	DszC	2.9e-15	53	0.2	5.6e-14	48.8	0.2	2.1	1	1	0	1	1	1	1	1
		CH_15-scaffold_226_10	DszC	1e-13	47.9	0	1.5e-11	40.8	0	2.1	1	1	0	1	1	1	1	1
		CH_15-scaffold_265_45	DszC	1.9e-13	47	0.3	3.7e-12	42.8	0.3	2	1	1	0	1	1	1	1	1
		CH_15-scaffold_149_27	DszC	6.3e-09	32.2	0	9.4e-09	31.6	0	1.2	1	0	0	1	1	1	1	1
		CH_15-scaffold_1169_18	DszC	1.1e-08	31.3	0	2e-08	30.5	0	1.3	2	0	0	2	2	2	1	1
		CH_15-scaffold_2347_4	DszC	4.7e-08	29.3	0.1	5.3e-07	25.8	0	1.9	2	0	0	2	2	2	1	1
		CH_15-scaffold_2347_11	DszC	1.6e-07	27.5	0	0.00023	17.1	0.1	3.1	3	0	0	3	3	3	1	1
		CH_15-scaffold_2347_6	DszC	3.2e-06	23.2	0	4.2e-06	22.9	0	1.1	1	0	0	1	1	1	1	1
		CH_15-scaffold_1169_16	DszC	1.6e-05	20.9	0.1	8.9e-05	18.5	0	1.9	1	1	0	2	2	2	1	1
		CH_15-scaffold_188_45	DszC	0.00024	17.1	0	0.00072	15.5	0	1.7	2	0	0	2	2	2	1	0
		CH_15-scaffold_1728_10	DszC	0.0015	14.4	0	0.009	11.9	0	1.9	2	0	0	2	2	2	1	0
		CH_15-scaffold_1398_14	EbdA	1.5e-24	82.9	0	1.1e-18	63.5	0	4	3	1	1	4	4	4	2	1
		CH_15-scaffold_18_23	EbdA	6.9e-17	57.5	0	4.1e-06	21.9	0	4	3	1	1	4	4	4	4	1
		CH_15-scaffold_188_17	EbdA	7.9e-16	54	0	4.8e-07	25	0	4	3	1	1	4	4	4	4	1
		CH_15-scaffold_265_51	EbdA	4.4e-10	35	0.5	0.00039	15.3	0	3.6	4	0	0	4	4	4	2	1
		CH_15-scaffold_116_25	LadA_alpha	0.028	10.1	0	0.066	8.9	0	1.5	2	0	0	2	2	2	0	0
		CH_15-scaffold_42_38	NmsA	1e-104	348.3	0	7.1e-104	345.5	0	1.8	1	1	0	1	1	1	1	1
		CH_15-scaffold_42_30	NmsA	1.6e-94	314.6	0	2e-94	314.2	0	1	1	0	0	1	1	1	1	1
		CH_15-scaffold_4543_10	NmsA	5e-58	193.9	0	1.3e-57	192.5	0	1.5	1	1	0	1	1	1	1	1
CH_15_sub	UBP6	CH_15_sub-scaffold_6063_9	AbcA_1	0.016	11	0.1	0.018	10.8	0.1	1.1	1	0	0	1	1	1	0	0
		CH_15_sub-scaffold_8009_10	AlkB	0.00011	18.4	0	0.00012	18.3	0	1	1	0	0	1	1	1	1	0
		CH_15_sub-scaffold_8904_6	AlkB	0.76	5.7	4.9	1	5.3	4.9	1.1	1	0	0	1	1	1	0	0
		CH_15_sub-scaffold_3506_9	AlkB	1.2	5	12.2	1.4	4.8	12.2	1	1	0	0	1	1	1	0	0
		CH_15_sub-scaffold_1635_16	AlmA_GroupI	0.0001	18.2	0	0.012	11.4	0	2.7	2	1	1	3	3	3	2	0
		CH_15_sub-scaffold_18892_5	AlmA_GroupI	0.0036	13.1	0	0.0053	12.6	0	1.2	1	0	0	1	1	1	1	0
		CH_15_sub-scaffold_3907_15	AlmA_GroupI	0.0084	11.9	0.1	0.45	6.2	0	2.7	3	0	0	3	3	3	2	0
		CH_15_sub-scaffold_3153_3	AlmA_GroupI	0.014	11.2	0.1	0.026	10.3	0.1	1.5	1	0	0	1	1	1	0	0
		CH_15_sub-scaffold_27076_4	AlmA_GroupIII	0.018	10.9	0	0.031	10.1	0	1.2	1	0	0	1	1	1	0	0
		CH_15_sub-scaffold_1805_12	CYP153	0.016	11.2	0	0.024	10.6	0	1.2	1	0	0	1	1	1	0	0
		CH_15_sub-scaffold_3153_1	TmoA_BmoA	0.0046	13	0.1	0.0058	12.7	0.1	1.1	1	0	0	1	1	1	1	0
CH_16	UBP7_A	CH_16-scaffold_21144_2	AbcA_1	1.1e-42	142.5	0	3.1e-42	141	0	1.6	2	0	0	2	2	2	1	1
		CH_16-scaffold_21144_2	AbcA_2	1.9e-158	524.1	0	4e-158	523	0	1.4	1	1	0	1	1	1	1	1
		CH_16-scaffold_50678_1	AhyA	0.02	9.1	0	0.05	7.8	0	1.5	2	0	0	2	2	2	0	0
		CH_16-scaffold_7066_8	AlkB	0.00018	16.7	0	0.00018	16.7	0	1	1	0	0	1	1	1	1	0
		CH_16-scaffold_9771_4	AlmA_GroupI	0.0063	11.3	0.2	0.15	6.8	0.1	2.1	2	0	0	2	2	2	2	0
		CH_16-scaffold_21144_2	K27540	8.7e-57	189.2	0	2.5e-54	181	0	2	2	0	0	2	2	2	2	1
CH_19	Chloroflexota	CH_19-scaffold_85026_3	AhyA	1e-24	83.2	0.2	2.9e-12	42	0	3	3	0	0	3	3	3	3	1
		CH_19-scaffold_15922_2	AhyA	2.5e-23	78.6	0	6.3e-09	31	0	4	3	1	1	4	4	4	4	1
		CH_19-scaffold_36952_1	AhyA	5.6e-13	44.4	1.6	1.8e-12	42.7	0.6	1.8	1	1	0	2	2	2	1	1
		CH_19-scaffold_59224_7	AlkB	7.6e-06	21.5	0	7.8e-06	21.5	0	1.1	1	0	0	1	1	1	1	1
		CH_19-scaffold_25725_4	AlkB	2.6e-05	19.8	0	2.6e-05	19.8	0	1	1	0	0	1	1	1	1	1
		CH_19-scaffold_96618_4	AlmA_GroupIII	0.00015	17	0.1	0.00017	16.9	0.1	1	1	0	0	1	1	1	1	0
		CH_19-scaffold_24064_4	AssA	9.8e-89	294.8	0	1.3e-88	294.4	0	1.1	1	0	0	1	1	1	1	1
		CH_19-scaffold_24064_4	BssA	1.7e-79	264.2	0	2.2e-79	263.8	0	1	1	0	0	1	1	1	1	1
		CH_19-scaffold_85026_3	CmdA	1.6e-31	105.5	0	4.8e-18	60.9	0	3	3	0	0	3	3	3	3	1
		CH_19-scaffold_36952_1	CmdA	2.8e-09	31.9	0	3.4e-09	31.7	0	1.1	1	0	0	1	1	1	1	1
		CH_19-scaffold_15922_2	CmdA	4.4e-09	31.3	0	0.0005	14.6	0	3	3	0	0	3	3	3	3	1
		CH_19-scaffold_37895_3	DszC	1.1e-14	50.5	0.1	1.7e-13	46.6	0.1	2.2	1	1	0	1	1	1	1	1
		CH_19-scaffold_9640_4	DszC	1.1e-11	40.5	0	1.5e-11	40.1	0	1.2	1	0	0	1	1	1	1	1
		CH_19-scaffold_40762_3	DszC	1.6e-11	40	0	5.6e-11	38.2	0	1.9	1	1	0	1	1	1	1	1
		CH_19-scaffold_21170_4	DszC	2.2e-10	36.3	0	3.3e-10	35.7	0	1.2	1	0	0	1	1	1	1	1
		CH_19-scaffold_45977_4	DszC	3.5e-08	29	0	4.5e-08	28.7	0	1.2	1	0	0	1	1	1	1	1
		CH_19-scaffold_40762_2	DszC	4.1e-08	28.8	0.2	5.1e-07	25.2	0.1	2.3	2	1	0	2	2	2	1	1
		CH_19-scaffold_36375_6	DszC	1.1e-07	27.4	0	1.4e-07	27.1	0	1.2	1	0	0	1	1	1	1	1
		CH_19-scaffold_7573_2	DszC	1.2e-07	27.2	0	2.8e-07	26	0	1.5	1	1	0	1	1	1	1	1
		CH_19-scaffold_77656_2	DszC	2.7e-07	26.1	0	4e-07	25.5	0	1.2	1	0	0	1	1	1	1	1
		CH_19-scaffold_45977_5	DszC	3.7e-07	25.7	0	5e-07	25.2	0	1.2	1	0	0	1	1	1	1	1
		CH_19-scaffold_39641_3	DszC	1.9e-05	20	0.1	0.0014	13.8	0.1	2.1	1	1	0	1	1	1	1	1
		CH_19-scaffold_7441_1	DszC	0.0025	13	0.3	0.02	10	0.3	2	1	1	0	1	1	1	1	0
		CH_19-scaffold_85026_3	EbdA	4.9e-23	77.2	0.1	5.5e-09	30.7	0	3	3	0	0	3	3	3	3	1
		CH_19-scaffold_15922_2	EbdA	7.6e-22	73.3	0	2e-08	28.8	0	4	3	1	1	4	4	4	4	1
		CH_19-scaffold_36952_1	EbdA	1.1e-11	39.6	0.1	1.4e-11	39.3	0	1.3	1	1	0	1	1	1	1	1
		CH_19-scaffold_24064_4	NmsA	2.2e-78	260.5	0.3	1.7e-77	257.5	0.3	1.9	1	1	0	1	1	1	1	1
		CH_19-scaffold_13319_4	pBmoB	0.0021	13.6	0.1	0.0036	12.8	0.1	1.3	1	0	0	1	1	1	1	0
CH_21	Chloroflexota	CH_21-scaffold_84_105	AbcA_1	2.1e-40	135.9	0	2.6e-40	135.6	0	1	1	0	0	1	1	1	1	1
		CH_21-scaffold_84_105	AbcA_2	4.7e-66	220.3	0.2	3.6e-58	194.3	0	2	1	1	1	2	2	2	2	1
		CH_21-scaffold_1878_30	AhyA	1.9e-09	33.3	0	5.1e-09	31.9	0	1.6	2	0	0	2	2	2	1	1
		CH_21-scaffold_23604_5	AlmA_GroupI	1.3e-05	21.1	0	0.017	10.9	0	2.2	2	0	0	2	2	2	2	1
		CH_21-scaffold_2046_15	AlmA_GroupI	0.0046	12.7	0.1	0.045	9.5	0	2.3	3	0	0	3	3	3	1	0
		CH_21-scaffold_2857_15	AlmA_GroupI	0.011	11.5	0	0.016	11	0	1.1	1	0	0	1	1	1	0	0
		CH_21-scaffold_91_27	AlmA_GroupI	0.016	10.9	0	0.17	7.6	0	2.1	2	0	0	2	2	2	0	0
		CH_21-scaffold_23604_5	AlmA_GroupIII	0.0048	12.8	0	0.38	6.5	0	2.2	2	0	0	2	2	2	2	0
		CH_21-scaffold_6452_6	AssA	4.5e-121	402.4	0	6.2e-121	402	0	1	1	0	0	1	1	1	1	1
		CH_21-scaffold_6452_6	BssA	9.9e-104	345	0	2.1e-103	343.9	0	1.4	1	1	0	1	1	1	1	1
		CH_21-scaffold_1015_22	DszC	4.6e-19	65.5	0	4e-15	52.5	0	2	2	0	0	2	2	2	2	1
		CH_21-scaffold_426_11	DszC	6.5e-14	48.6	0.1	2.4e-13	46.7	0.1	1.9	1	1	0	1	1	1	1	1
		CH_21-scaffold_626_49	DszC	9.3e-08	28.3	0.3	1.6e-07	27.5	0.2	1.3	1	1	0	1	1	1	1	1
		CH_21-scaffold_1878_30	EbdA	3.1e-08	28.8	0	5.5e-08	28	0	1.4	2	0	0	2	2	2	1	1
		CH_21-scaffold_84_105	K27540	4.9e-60	200.8	0	5.8e-60	200.6	0	1	1	0	0	1	1	1	1	1
		CH_21-scaffold_115_6	LadB	9.1e-07	25.2	0	2.9e-06	23.5	0	1.7	2	0	0	2	2	2	1	1
		CH_21-scaffold_273_76	LadB	1.6e-05	21.1	0	2.2e-05	20.6	0	1.1	1	0	0	1	1	1	1	1
		CH_21-scaffold_4226_14	NdoB	0.0011	15	0	0.0014	14.7	0	1	1	0	0	1	1	1	1	0
		CH_21-scaffold_6452_6	NmsA	8.9e-95	315.4	0	1.4e-94	314.7	0	1.2	1	0	0	1	1	1	1	1
		CH_21-scaffold_20590_6	non_NdoB_type	0.0023	14.3	0	0.0025	14.1	0	1.1	1	0	0	1	1	1	1	0
		CH_21-scaffold_4226_14	non_NdoB_type	0.0066	12.8	0	0.0078	12.5	0	1	1	0	0	1	1	1	1	0
		CH_21-scaffold_84_3	non_NdoB_type	0.007	12.7	0	0.0087	12.4	0	1.1	1	0	0	1	1	1	1	0
		CH_21-scaffold_578_55	pBmoB	0.013	11.5	0.1	0.013	11.5	0.1	1.1	1	0	0	1	1	1	0	0
CH_22	Chloroflexota	CH_22-scaffold_736_13	AhyA	3.8e-31	104	0.1	4.8e-13	44.1	0	3.9	3	1	1	4	4	4	3	1
		CH_22-scaffold_575_31	AhyA	2.8e-16	54.8	0.5	2.9e-13	44.8	0.1	2.4	3	0	0	3	3	3	2	1
		CH_22-scaffold_3128_14	AlkB	3.9e-06	22	0	5e-06	21.7	0	1.1	1	0	0	1	1	1	1	1
		CH_22-scaffold_3128_13	AlkB	0.00045	15.2	0	0.00053	15	0	1.1	1	0	0	1	1	1	1	0
		CH_22-scaffold_9995_4	AlmA_GroupI	7.3e-05	17.6	0.3	0.0012	13.6	0	2.3	3	0	0	3	3	3	2	1
		CH_22-scaffold_1702_17	AlmA_GroupI	0.01	10.5	0.1	0.033	8.8	0	1.7	2	0	0	2	2	2	0	0
		CH_22-scaffold_1244_17	AssA	1.3e-65	217.8	0	5.2e-33	110	0	2.3	2	1	0	2	2	2	2	1
		CH_22-scaffold_1244_17	BssA	1.3e-54	181.4	0	2.7e-29	97.6	0	2.6	2	1	0	2	2	2	2	1
		CH_22-scaffold_736_13	CmdA	1.9e-15	51.9	0	3.1e-06	21.4	0	4	3	1	1	4	4	4	4	1
		CH_22-scaffold_575_31	CmdA	2.8e-09	31.5	2.5	9e-09	29.8	2.5	1.7	1	1	0	1	1	1	1	1
		CH_22-scaffold_1349_22	DszC	8.5e-20	66.8	0	2e-19	65.6	0	1.6	1	1	0	1	1	1	1	1
		CH_22-scaffold_4593_12	DszC	4.9e-09	31.4	0	5.7e-09	31.2	0	1.1	1	0	0	1	1	1	1	1
		CH_22-scaffold_2949_12	DszC	1.1e-08	30.2	0	1.7e-08	29.6	0	1.2	1	0	0	1	1	1	1	1
		CH_22-scaffold_1381_7	DszC	7.1e-07	24.3	0	2.2e-06	22.7	0	1.7	2	0	0	2	2	2	1	1
		CH_22-scaffold_4391_7	DszC	1.4e-05	20	0	0.0035	12.1	0	2.5	2	1	0	2	2	2	2	1
		CH_22-scaffold_309_26	DszC	1.4e-05	20	0	0.0023	12.7	0	2.7	1	1	0	1	1	1	1	1
		CH_22-scaffold_1011_26	DszC	2.4e-05	19.2	0.3	0.023	9.4	0	2.9	2	1	0	2	2	2	2	1
		CH_22-scaffold_1011_25	DszC	0.0023	12.7	0.2	0.0065	11.2	0.2	1.6	1	1	0	1	1	1	1	0
		CH_22-scaffold_736_13	EbdA	2.4e-29	97.6	0	2.1e-12	41.5	0	4	3	1	1	4	4	4	4	1
		CH_22-scaffold_575_31	EbdA	3.8e-13	44	3	1.2e-12	42.4	1.9	2.2	2	1	0	2	2	2	1	1
		CH_22-scaffold_1244_17	NmsA	2e-55	184.1	0	2e-31	104.7	0	2.8	2	1	0	2	2	2	2	1
		CH_22-scaffold_817_35	pBmoC	0.0091	11.6	0	0.012	11.2	0	1.1	1	0	0	1	1	1	1	0
CH_23	Bacteroidota	CH_23-scaffold_16_158	AbcA_1	1.1e-44	150	0.1	2.5e-44	148.9	0.1	1.4	2	0	0	2	2	2	1	1
		CH_23-scaffold_16_158	AbcA_2	1.8e-142	472.3	1.4	1.9e-139	462.4	0.1	2.5	2	1	0	2	2	2	2	1
		CH_23-scaffold_12_47	AhyA	1.3e-61	206	2.4	3e-43	145.2	0.1	4	4	0	0	4	4	4	4	1
		CH_23-scaffold_14_1	AhyA	1.2e-28	96.8	0.3	3.9e-09	32.3	0	4	3	1	1	4	4	4	4	1
		CH_23-scaffold_504_1	AhyA	0.023	9.8	0	0.033	9.4	0	1.1	1	0	0	1	1	1	0	0
		CH_23-scaffold_25_71	AlkB	0.00061	15.9	0	0.00061	15.9	0	1	1	0	0	1	1	1	1	0
		CH_23-scaffold_16_80	AlkB	5.6	2.8	8.7	0.8	5.6	0.1	2.5	3	0	0	3	3	3	0	0
		CH_23-scaffold_12_41	AlmA_GroupI	3.8e-05	19.6	0.1	0.0045	12.8	0.1	2.6	2	1	0	2	2	2	2	1
		CH_23-scaffold_12_169	AlmA_GroupI	0.0022	13.8	0	0.0047	12.7	0	1.5	2	0	0	2	2	2	1	0
		CH_23-scaffold_113_20	AlmA_GroupI	0.0024	13.7	0.1	1.9	4.1	0	3.5	3	1	1	4	4	4	2	0
		CH_23-scaffold_5_63	AssA	1.1e-129	430.9	0	1.5e-129	430.5	0	1	1	0	0	1	1	1	1	1
		CH_23-scaffold_5_63	BssA	1.4e-114	380.9	0	3.2e-114	379.7	0	1.4	1	1	0	1	1	1	1	1
		CH_23-scaffold_12_47	CmdA	3.5e-35	118.3	0.1	2.9e-25	85.5	0.1	3.6	4	0	0	4	4	4	3	1
		CH_23-scaffold_14_1	CmdA	9.8e-13	44	0	7.2e-05	18	0	3.6	2	1	2	4	4	4	3	1
		CH_23-scaffold_16_43	DszC	4.4e-13	45.8	0	7.4e-13	45.1	0	1.3	1	0	0	1	1	1	1	1
		CH_23-scaffold_12_47	EbdA	3e-49	164.6	1.7	6.7e-32	107.2	0.1	4	4	0	0	4	4	4	4	1
		CH_23-scaffold_14_1	EbdA	5e-24	81.1	0	9.2e-10	33.9	0	3.9	3	1	1	4	4	4	4	1
		CH_23-scaffold_16_158	K27540	1.9e-48	162.6	0.5	1.6e-47	159.5	0.5	2	1	1	0	1	1	1	1	1
		CH_23-scaffold_5_63	NmsA	2.6e-107	356.8	0	3.9e-107	356.2	0	1.1	1	0	0	1	1	1	1	1
		CH_23-scaffold_12_170	sBmoX	0.028	10	0	0.029	9.9	0	1	1	0	0	1	1	1	0	0
CH_24	Cloacimonadota	CH_24-scaffold_3410_10	AlkB	7.2e-06	22.1	0	7.2e-06	22.1	0	1	1	0	0	1	1	1	1	1
		CH_24-scaffold_31127_3	AlkB	0.0037	13.2	0.4	0.0041	13	0.4	1	1	0	0	1	1	1	1	0
		CH_24-scaffold_28034_2	AlmA_GroupI	0.0031	13.2	0.2	0.35	6.4	0	2.9	3	0	0	3	3	3	2	0
		CH_24-scaffold_1789_9	AlmA_GroupI	0.0069	12	0	0.0092	11.6	0	1.2	1	0	0	1	1	1	1	0
		CH_24-scaffold_5538_12	AlmA_GroupI	0.017	10.7	0.1	0.026	10.1	0.1	1.2	1	0	0	1	1	1	0	0
		CH_24-scaffold_28034_2	AlmA_GroupIII	0.0021	13.8	1.4	0.86	5.1	0	3.1	2	1	0	3	3	3	2	0
		CH_24-scaffold_1269_9	AlmA_GroupIII	0.025	10.2	0	0.23	7	0	1.9	2	0	0	2	2	2	0	0
		CH_24-scaffold_4636_7	AssA	1.7e-93	311	0.1	1.3e-92	308.1	0	1.9	2	0	0	2	2	2	2	1
		CH_24-scaffold_4636_7	BssA	3.6e-84	280.1	0.5	1.2e-78	261.9	0.1	2.3	2	1	0	2	2	2	2	1
		CH_24-scaffold_15928_12	DszC	5.8e-18	61.7	0	7.7e-18	61.3	0	1.1	1	0	0	1	1	1	1	1
		CH_24-scaffold_940_3	LadA_beta	0.015	11.1	0	0.02	10.7	0	1.4	1	0	0	1	1	1	0	0
		CH_24-scaffold_4636_7	NmsA	2.6e-81	270.7	0.3	2.2e-74	247.7	0	2.1	2	0	0	2	2	2	2	1
CH_27	Thermoplasmatota	CH_27-scaffold_8485_1	AbcA_1	9.9e-09	30.4	0.9	6.7e-08	27.7	0.9	2	1	1	0	1	1	1	1	1
		CH_27-scaffold_8485_1	AbcA_2	3.3e-25	84.6	3.7	2e-17	58.9	0.8	2.1	1	1	0	2	2	2	2	1
		CH_27-scaffold_10160_9	AlkB	3.4e-06	22.4	0	4.1e-06	22.1	0	1.1	1	0	0	1	1	1	1	1
		CH_27-scaffold_4800_12	AlkB	0.0097	11	0	0.0097	11	0	2	3	0	0	3	3	3	1	0
		CH_27-scaffold_16633_12	AlmA_GroupI	0.0044	11.8	0.3	0.042	8.6	0	2.4	2	1	0	3	3	3	1	0
		CH_27-scaffold_8485_1	K27540	2.1e-17	59.3	0.8	2.8e-17	58.9	0.8	1.1	1	0	0	1	1	1	1	1
CH_30	Desulfobacterota	CH_30-scaffold_29311_1	AbcA_1	8.6e-25	84.7	0.2	2e-24	83.5	0.2	1.6	1	1	0	1	1	1	1	1
		CH_30-scaffold_2344_15	AbcA_1	4.8e-14	49.3	0	1.7e-13	47.5	0	1.8	1	1	0	1	1	1	1	1
		CH_30-scaffold_29311_1	AbcA_2	1.6e-97	324.4	0.2	1.9e-97	324.2	0.2	1	1	0	0	1	1	1	1	1
		CH_30-scaffold_2344_15	AbcA_2	1.9e-62	208.7	0	7.8e-62	206.7	0	1.7	2	0	0	2	2	2	1	1
		CH_30-scaffold_5241_6	AhyA	3.2e-28	95.8	0	2e-23	79.9	0	3.3	3	1	0	3	3	3	2	1
		CH_30-scaffold_988_5	AhyA	5e-24	81.9	0.7	3.2e-14	49.4	0.1	3.9	3	1	0	3	3	3	3	1
		CH_30-scaffold_13038_5	AhyA	4.1e-20	69	0	2.6e-06	23.3	0	4	3	1	1	4	4	4	4	1
		CH_30-scaffold_3370_2	AhyA	2.9e-19	66.1	0.1	7.1e-06	21.8	0	4	3	1	1	4	4	4	4	1
		CH_30-scaffold_13038_4	AhyA	4.1e-06	22.6	0	5.3e-06	22.2	0	1.1	1	0	0	1	1	1	1	1
		CH_30-scaffold_888_25	AhyA	5.1e-05	19	0	0.00021	17	0	1.9	2	1	0	2	2	2	1	1
		CH_30-scaffold_3370_3	AhyA	0.0016	14	0	0.0017	14	0	1	1	0	0	1	1	1	1	0
		CH_30-scaffold_13668_2	AlkB	6e-05	19.5	0	6e-05	19.5	0	1	1	0	0	1	1	1	1	1
		CH_30-scaffold_992_2	AlkB	0.0028	14	0	0.0029	14	0	1	1	0	0	1	1	1	1	0
		CH_30-scaffold_13668_4	AlkB	0.0057	13	0	0.0059	13	0	1	1	0	0	1	1	1	1	0
		CH_30-scaffold_6593_2	AlkB	1.6	4.9	5.2	0.15	8.3	0.1	1.9	2	0	0	2	2	2	0	0
		CH_30-scaffold_888_22	AlmA_GroupI	0.00059	16	0	0.00078	15.6	0	1.1	1	0	0	1	1	1	1	0
		CH_30-scaffold_28912_14	AlmA_GroupI	0.0039	13.3	2	0.7	5.9	0	3	3	0	0	3	3	3	2	0
		CH_30-scaffold_1594_42	AlmA_GroupI	0.0088	12.1	0	0.12	8.4	0	2.2	2	0	0	2	2	2	1	0
		CH_30-scaffold_3855_7	AlmA_GroupI	0.011	11.8	0	0.017	11.2	0	1.2	1	0	0	1	1	1	0	0
		CH_30-scaffold_8809_2	AlmA_GroupI	0.028	10.5	0.1	0.31	7	0	2	2	0	0	2	2	2	0	0
		CH_30-scaffold_2089_27	AlmA_GroupI	0.032	10.3	0.9	3.7	3.5	0.1	3	3	0	0	3	3	3	0	0
		CH_30-scaffold_33687_2	AlmA_GroupIII	0.0044	13.2	0	0.0088	12.2	0	1.4	1	0	0	1	1	1	1	0
		CH_30-scaffold_3924_12	AssA	1.3e-138	460.7	0	1.6e-138	460.4	0	1	1	0	0	1	1	1	1	1
		CH_30-scaffold_9013_1	AssA	7e-106	352.5	0	8.4e-106	352.2	0	1	1	0	0	1	1	1	1	1
		CH_30-scaffold_2999_22	AssA	0.00029	16.3	0	0.00041	15.8	0	1.2	1	0	0	1	1	1	1	0
		CH_30-scaffold_3924_12	BssA	9.6e-134	444.6	0	1.1e-133	444.4	0	1	1	0	0	1	1	1	1	1
		CH_30-scaffold_9013_1	BssA	1.3e-105	351.5	0	1.6e-105	351.3	0	1	1	0	0	1	1	1	1	1
		CH_30-scaffold_2999_22	BssA	1.1e-05	20.9	0	1.4e-05	20.6	0	1.1	1	0	0	1	1	1	1	1
		CH_30-scaffold_5241_6	CmdA	1.6e-17	60.2	0	1.8e-16	56.7	0.1	2.2	2	1	0	2	2	2	1	1
		CH_30-scaffold_988_5	CmdA	5.3e-16	55.2	0.5	1.5e-09	33.8	0	3.7	4	0	0	4	4	4	3	1
		CH_30-scaffold_13038_5	CmdA	4.5e-10	35.5	0	0.0027	13.1	0	3.4	3	1	1	4	4	4	3	1
		CH_30-scaffold_13038_4	CmdA	0.0061	11.9	0.1	0.0077	11.6	0.1	1.1	1	0	0	1	1	1	1	0
		CH_30-scaffold_3370_2	CmdA	0.022	10.1	0.1	1.8	3.8	0	2.6	3	0	0	3	3	3	0	0
		CH_30-scaffold_988_32	DszC	7.4e-16	55.3	0	1e-13	48.2	0	2.1	1	1	0	1	1	1	1	1
		CH_30-scaffold_5998_13	DszC	1e-15	54.8	0	1.6e-15	54.2	0	1.4	1	1	0	1	1	1	1	1
		CH_30-scaffold_17164_3	DszC	2.1e-15	53.8	0	2e-13	47.3	0	2.1	1	1	0	1	1	1	1	1
		CH_30-scaffold_10832_1	DszC	4.5e-14	49.4	0.1	1.1e-11	41.5	0.1	2	1	1	0	1	1	1	1	1
		CH_30-scaffold_12553_2	DszC	2.3e-12	43.7	0	4e-11	39.7	0	2	1	1	1	2	2	2	1	1
		CH_30-scaffold_10832_7	DszC	1.4e-11	41.2	0	3e-11	40.1	0	1.5	1	1	0	1	1	1	1	1
		CH_30-scaffold_5347_11	DszC	2.9e-09	33.5	0	3.2e-09	33.4	0	1.2	1	0	0	1	1	1	1	1
		CH_30-scaffold_2656_13	DszC	1.2e-06	24.9	0.1	3.6e-06	23.4	0.1	1.8	1	1	0	1	1	1	1	1
		CH_30-scaffold_5347_10	DszC	1.3e-06	24.8	0	0.00014	18.1	0	2.1	1	1	0	1	1	1	1	1
		CH_30-scaffold_3412_18	DszC	2.5e-06	23.9	0	0.0062	12.7	0	2.2	2	0	0	2	2	2	2	1
		CH_30-scaffold_3623_12	DszC	3.1e-06	23.6	0.2	5e-06	22.9	0.2	1.2	1	0	0	1	1	1	1	1
		CH_30-scaffold_6535_1	DszC	5.3e-06	22.8	0	0.00044	16.5	0.1	2.2	2	0	0	2	2	2	1	1
		CH_30-scaffold_4952_9	DszC	6.1e-06	22.6	0	3.2e-05	20.2	0.1	1.9	2	0	0	2	2	2	1	1
		CH_30-scaffold_37226_7	DszC	2.9e-05	20.4	0	2.9e-05	20.4	0	1	1	0	0	1	1	1	1	1
		CH_30-scaffold_2555_9	DszC	4.2e-05	19.8	0	0.012	11.7	0	2.1	2	0	0	2	2	2	2	1
		CH_30-scaffold_2349_24	DszC	5.3e-05	19.5	0.4	0.0002	17.6	0	1.8	2	0	0	2	2	2	1	1
		CH_30-scaffold_11714_8	DszC	0.0018	14.5	0	0.0049	13	0	1.7	2	1	0	2	2	2	1	0
		CH_30-scaffold_10797_15	DszC	0.0089	12.2	0	0.012	11.7	0	1.1	1	0	0	1	1	1	1	0
		CH_30-scaffold_1455_1	DszC	0.009	12.2	0	0.011	11.9	0	1.1	1	0	0	1	1	1	1	0
		CH_30-scaffold_3924_36	DszC	0.012	11.7	0	0.012	11.7	0	1	1	0	0	1	1	1	0	0
		CH_30-scaffold_5241_6	EbdA	2.4e-23	79.2	0	7.6e-12	41.1	0	4.1	4	0	0	4	4	4	3	1
		CH_30-scaffold_988_5	EbdA	1.2e-22	76.8	0.7	1.2e-07	27.2	0	4.1	4	0	0	4	4	4	4	1
		CH_30-scaffold_13038_5	EbdA	1.2e-20	70.2	0.2	3e-07	25.9	0	3.8	3	1	1	4	4	4	3	1
		CH_30-scaffold_3370_2	EbdA	1.6e-16	56.6	0	1.8e-06	23.3	0	4	3	1	1	4	4	4	4	1
		CH_30-scaffold_888_25	EbdA	0.00015	17	0	0.00022	16.4	0	1.1	1	0	0	1	1	1	1	0
		CH_30-scaffold_13038_4	EbdA	0.00084	14.5	0	0.0011	14.1	0	1.1	1	0	0	1	1	1	1	0
		CH_30-scaffold_29311_1	K27540	2.1e-30	103.4	0	4.6e-30	102.3	0	1.5	1	1	0	1	1	1	1	1
		CH_30-scaffold_2344_15	K27540	6.6e-24	82	0	9.5e-23	78.2	0	2.3	1	1	0	1	1	1	1	1
		CH_30-scaffold_2846_6	LadA_alpha	0.0017	14.4	0	0.0028	13.7	0	1.2	1	0	0	1	1	1	1	0
		CH_30-scaffold_28610_5	LadA_alpha	0.0087	12.1	0	0.015	11.4	0	1.2	1	0	0	1	1	1	1	0
		CH_30-scaffold_3924_12	NmsA	1.5e-130	434	0	1.9e-130	433.7	0	1	1	0	0	1	1	1	1	1
		CH_30-scaffold_9013_1	NmsA	2.9e-101	337.2	0	3.8e-101	336.8	0	1	1	0	0	1	1	1	1	1
		CH_30-scaffold_2999_22	NmsA	6.2e-06	21.8	0	7.9e-06	21.5	0	1.2	1	0	0	1	1	1	1	1
CH_32_sub	Crearchaeota	CH_32_sub-scaffold_167369_4	AlkB	8.5e-05	17.5	0	8.5e-05	17.5	0	1	1	0	0	1	1	1	1	1
		CH_32_sub-scaffold_34805_1	AlmA_GroupI	0.00039	15.1	0.3	0.038	8.6	0	2.7	2	1	1	3	3	3	2	0
		CH_32_sub-scaffold_29665_1	AlmA_GroupI	0.00064	14.4	0	0.00098	13.8	0	1.2	1	0	0	1	1	1	1	0
		CH_32_sub-scaffold_64593_3	AlmA_GroupIII	0.0014	13.3	0.1	0.0028	12.3	0.1	1.4	2	0	0	2	2	2	1	0
		CH_32_sub-scaffold_29665_1	AlmA_GroupIII	0.0045	11.6	0	0.0083	10.8	0	1.3	1	0	0	1	1	1	1	0
		CH_32_sub-scaffold_97212_2	AssA	1.1e-63	211.3	0	1.4e-63	211.1	0	1	1	0	0	1	1	1	1	1
		CH_32_sub-scaffold_97212_1	AssA	1.2e-33	112.1	0	1.4e-33	111.8	0	1	1	0	0	1	1	1	1	1
		CH_32_sub-scaffold_97212_2	BssA	5.9e-56	185.8	0	7e-56	185.5	0	1	1	0	0	1	1	1	1	1
		CH_32_sub-scaffold_97212_1	BssA	1.4e-31	105.2	0	1.7e-31	104.9	0	1	1	0	0	1	1	1	1	1
		CH_32_sub-scaffold_67479_3	DszC	1.8e-12	42.6	0.1	5.4e-11	37.7	0.1	2	1	1	0	1	1	1	1	1
		CH_32_sub-scaffold_86531_6	LadA_alpha	0.00012	16.7	0	0.00042	14.9	0	1.8	1	1	1	2	2	2	1	0
		CH_32_sub-scaffold_167369_1	LadA_alpha	0.0015	13.2	0	0.0015	13.1	0	1	1	0	0	1	1	1	1	0
		CH_32_sub-scaffold_29253_7	LadA_alpha	0.0086	10.6	0	0.027	9	0	1.7	1	1	1	2	2	2	1	0
		CH_32_sub-scaffold_86531_6	LadA_beta	3.3e-07	25.4	0	5e-07	24.8	0	1.2	1	0	0	1	1	1	1	1
		CH_32_sub-scaffold_29253_7	LadA_beta	0.00017	16.5	0	0.00022	16.1	0	1.2	1	0	0	1	1	1	1	0
		CH_32_sub-scaffold_29253_7	LadB	1.7e-17	59.3	0	3.4e-17	58.3	0	1.5	1	1	0	1	1	1	1	1
		CH_32_sub-scaffold_86531_6	LadB	2.5e-11	38.9	0	3.4e-11	38.5	0	1.2	1	0	0	1	1	1	1	1
		CH_32_sub-scaffold_97212_2	NmsA	1.7e-58	194.2	0	1.8e-58	194.1	0	1	1	0	0	1	1	1	1	1
		CH_32_sub-scaffold_97212_1	NmsA	1.7e-27	91.6	0	2.1e-27	91.3	0	1	1	0	0	1	1	1	1	1
CH_34	Marinisomatota	CH_34-scaffold_1903_5	AbcA_1	4.2e-42	141.2	0	9.6e-42	140	0	1.4	1	1	0	1	1	1	1	1
		CH_34-scaffold_1903_5	AbcA_2	2e-151	501.6	0	2.4e-151	501.3	0	1	1	0	0	1	1	1	1	1
		CH_34-scaffold_5164_7	AlkB	0.016	10.9	0.1	0.022	10.5	0.1	1.1	1	0	0	1	1	1	0	0
		CH_34-scaffold_2165_1	AlmA_GroupI	0.0047	12.4	0	0.068	8.6	0	2	2	0	0	2	2	2	2	0
		CH_34-scaffold_1583_12	AlmA_GroupI	0.053	8.9	1.5	0.45	5.8	0.4	2.6	2	1	1	3	3	3	0	0
		CH_34-scaffold_1903_5	K27540	1.1e-50	169.7	0	3.2e-50	168.1	0	1.6	1	1	0	1	1	1	1	1
CH_36	Patescibacteria	CH_36-scaffold_121074_4	CmdA	6.8e-05	16.3	0	7.8e-05	16.1	0	1	1	0	0	1	1	1	1	1
		CH_36-scaffold_121074_4	EbdA	0.00082	12.5	0	0.00091	12.3	0	1	1	0	0	1	1	1	1	0
		CH_36-scaffold_1853_7	pBmoB	0.0015	12.9	0	0.0019	12.6	0	1.1	1	0	0	1	1	1	1	0
CH_37	Delongbacteria	CH_37-scaffold_323_23	AhyA	6.8e-20	67.4	0.4	6.9e-09	30.9	0	4	3	1	1	4	4	4	4	1
		CH_37-scaffold_323_24	AhyA	0.012	10.3	0	0.016	9.9	0	1.1	1	0	0	1	1	1	0	0
		CH_37-scaffold_1507_29	AlmA_GroupI	0.0023	13.2	0.1	0.1	7.8	0	2.2	2	0	0	2	2	2	2	0
		CH_37-scaffold_815_6	AssA	3.4e-129	428.7	0	4.2e-129	428.5	0	1	1	0	0	1	1	1	1	1
		CH_37-scaffold_815_6	BssA	5.3e-120	398.3	0.2	6.8e-120	397.9	0.2	1.1	1	0	0	1	1	1	1	1
		CH_37-scaffold_323_23	CmdA	1.1e-08	30	0.2	0.013	10	0	4	3	1	1	4	4	4	4	1
		CH_37-scaffold_106_58	DszC	0.00028	16.3	0	0.00049	15.5	0	1.3	1	0	0	1	1	1	1	0
		CH_37-scaffold_323_23	EbdA	5.2e-17	57.4	0.1	3.4e-07	24.9	0	4	2	1	2	4	4	4	4	1
		CH_37-scaffold_815_6	NmsA	1.7e-107	356.9	0.1	2.1e-107	356.6	0.1	1	1	0	0	1	1	1	1	1
CH_39	Nanoarchaeota	CH_39-scaffold_934_45	AlkB	0.17	6.6	4.8	0.19	6.4	4.8	1.2	1	0	0	1	1	1	0	0
		CH_39-scaffold_934_53	AlkB	0.73	4.5	6.9	0.96	4.1	6.9	1.2	1	0	0	1	1	1	0	0
		CH_39-scaffold_1975_22	LadA_alpha	0.0042	11.6	0.1	0.0047	11.4	0.1	1.1	1	0	0	1	1	1	1	0
CH_42	Fibrobacterota	CH_42-scaffold_12247_1	AhyA	1.8e-26	90.3	0	1.3e-08	31.2	0	4.5	3	2	2	5	5	5	4	1
		CH_42-scaffold_18837_4	AhyA	9.2e-16	54.8	0.1	5.6e-06	22.5	0	3	3	0	0	3	3	3	3	1
		CH_42-scaffold_28344_3	AhyA	2.4e-13	46.9	0	1.5e-10	37.6	0	2.9	2	1	0	2	2	2	2	1
		CH_42-scaffold_46757_4	AhyA	1.4e-05	21.2	0	1.6e-05	20.9	0	1	1	0	0	1	1	1	1	1
		CH_42-scaffold_59104_1	AhyA	6e-05	19	0	0.019	10.8	0	2	2	0	0	2	2	2	2	1
		CH_42-scaffold_62167_1	AhyA	0.00036	16.5	0.1	0.16	7.7	0	2	1	1	1	2	2	2	2	0
		CH_42-scaffold_62167_2	AhyA	0.0034	13.2	0	0.0053	12.6	0	1.3	1	0	0	1	1	1	1	0
		CH_42-scaffold_28344_2	AhyA	0.018	10.9	0.4	0.033	10	0	1.6	2	0	0	2	2	2	0	0
		CH_42-scaffold_31046_1	AlkB	3.9e-06	23.7	0	3.9e-06	23.7	0	1	1	0	0	1	1	1	1	1
		CH_42-scaffold_22609_3	AlmA_GroupI	0.039	10.3	1.2	0.36	7.1	0.1	2	2	0	0	2	2	2	0	0
		CH_42-scaffold_22609_3	AlmA_GroupIII	0.015	11.7	0.5	0.12	8.8	0.1	2	2	0	0	2	2	2	0	0
		CH_42-scaffold_17752_3	AssA	1.8e-98	328.3	0	2.6e-98	327.8	0	1.2	1	0	0	1	1	1	1	1
		CH_42-scaffold_23821_4	AssA	6.3e-75	250.4	0	7.7e-75	250.1	0	1	1	0	0	1	1	1	1	1
		CH_42-scaffold_17752_3	BssA	1.7e-92	308.5	0	2.5e-92	307.9	0	1.1	1	0	0	1	1	1	1	1
		CH_42-scaffold_23821_4	BssA	2.8e-65	218.4	0	4.1e-65	217.8	0	1.2	1	0	0	1	1	1	1	1
		CH_42-scaffold_12247_1	CmdA	3.6e-09	32.8	0	0.00067	15.4	0	3.2	3	0	0	3	3	3	3	1
		CH_42-scaffold_28344_3	CmdA	1.3e-07	27.7	0.1	0.0037	12.9	0	2.1	2	0	0	2	2	2	2	1
		CH_42-scaffold_18837_4	CmdA	8.2e-06	21.7	0	0.021	10.4	0	3	3	0	0	3	3	3	3	1
		CH_42-scaffold_4514_4	DszC	2.8e-14	50.3	0.2	3.2e-13	46.9	0.2	2.2	1	1	0	1	1	1	1	1
		CH_42-scaffold_25524_1	DszC	9.5e-10	35.4	0.3	1.1e-07	28.6	0.3	2.1	1	1	0	1	1	1	1	1
		CH_42-scaffold_31212_4	DszC	2.6e-09	34	0	1.3e-08	31.7	0	1.8	1	1	1	2	2	2	2	1
		CH_42-scaffold_12247_1	EbdA	1.2e-22	77.2	0	5.2e-08	28.7	0	4.4	3	2	1	4	4	4	4	1
		CH_42-scaffold_28344_3	EbdA	1.8e-13	46.8	0	2.1e-12	43.3	0	2.6	3	1	0	3	3	3	1	1
		CH_42-scaffold_18837_4	EbdA	1.1e-11	40.9	0	3.8e-07	25.9	0	2.7	2	1	1	3	3	3	2	1
		CH_42-scaffold_59104_1	EbdA	1.6e-05	20.5	0.1	0.011	11.1	0	2	2	0	0	2	2	2	2	1
		CH_42-scaffold_62167_1	EbdA	0.00025	16.5	0	0.058	8.7	0	2	1	1	1	2	2	2	2	0
		CH_42-scaffold_46757_4	EbdA	0.00053	15.5	0	0.00053	15.5	0	1	1	0	0	1	1	1	1	0
		CH_42-scaffold_62167_2	EbdA	0.0072	11.7	0	0.0096	11.3	0	1.1	1	0	0	1	1	1	1	0
		CH_42-scaffold_17752_3	NmsA	2.6e-83	278	0	4.6e-83	277.2	0	1.3	1	1	0	1	1	1	1	1
		CH_42-scaffold_23821_4	NmsA	7.7e-62	207	0	1e-61	206.6	0	1.1	1	0	0	1	1	1	1	1
CH_45	Zixibacteria	CH_45-scaffold_6449_7	AlmA_GroupIII	0.0015	13.8	0	0.0021	13.3	0	1.2	1	0	0	1	1	1	1	0
		CH_45-scaffold_20705_3	DszC	5.4e-14	48.2	0	7.3e-14	47.7	0	1.1	1	0	0	1	1	1	1	1
		CH_45-scaffold_51839_3	TmoE	0.0021	13.9	0.4	0.0025	13.6	0.4	1	1	0	0	1	1	1	1	0
CH_47_sub	UBP7	CH_47_sub-scaffold_39_8	AhyA	0.023	9.3	0	0.033	8.8	0	1.1	1	0	0	1	1	1	0	0
		CH_47_sub-scaffold_19_53	AlkB	3.4e-06	22.8	0	3.4e-06	22.8	0	1	1	0	0	1	1	1	1	1
		CH_47_sub-scaffold_39_88	AlmA_GroupI	0.00052	15.3	0.1	0.004	12.4	0	2	2	0	0	2	2	2	2	0
		CH_47_sub-scaffold_16051_3	AssA	2e-08	29.3	0	2.3e-08	29.1	0	1	1	0	0	1	1	1	1	1
		CH_47_sub-scaffold_16051_3	BssA	8.2e-08	27.1	0	8.7e-08	27	0	1	1	0	0	1	1	1	1	1
		CH_47_sub-scaffold_4_73	NdoC	0.0011	15.4	0.1	0.0013	15.1	0.1	1.3	1	0	0	1	1	1	1	0
		CH_47_sub-scaffold_16051_3	NmsA	3.3e-07	25.2	0	3.9e-07	24.9	0	1	1	0	0	1	1	1	1	1
		CH_47_sub-scaffold_5269_7	sBmoZ	0.0053	13.4	0.2	0.007	13	0.2	1.1	1	0	0	1	1	1	1	0
CH_49	Actinobacteriota	CH_49-scaffold_1178_6	AhyA	1e-89	298.9	14.5	6.9e-31	104.2	0.2	5.1	5	0	0	5	5	5	5	1
		CH_49-scaffold_8726_7	AhyA	7.7e-41	137.1	0.1	7.1e-27	90.9	0	4.1	4	0	0	4	4	4	4	1
		CH_49-scaffold_258_8	AhyA	9.6e-37	123.6	0.5	2.5e-25	85.7	0.1	4.2	3	1	1	4	4	4	3	1
		CH_49-scaffold_1178_13	AhyA	1.9e-34	115.9	0	1.9e-22	76.2	0	4.2	3	1	1	4	4	4	3	1
		CH_49-scaffold_13998_2	AhyA	1.7e-24	83	0	1.2e-20	70.3	0	3.2	4	0	0	4	4	4	2	1
		CH_49-scaffold_3060_19	AhyA	4.9e-21	71.6	0.3	6.9e-10	34.7	0	4	3	1	1	4	4	4	4	1
		CH_49-scaffold_258_34	AlkB	0.037	9.9	0.1	0.072	8.9	0.1	1.4	1	0	0	1	1	1	0	0
		CH_49-scaffold_8726_2	AlmA_GroupI	6.4e-17	58.3	0.1	2.3e-13	46.6	0.1	2.3	2	1	0	2	2	2	2	1
		CH_49-scaffold_4434_10	AlmA_GroupI	0.00052	15.7	0	0.0008	15.1	0	1.2	1	0	0	1	1	1	1	0
		CH_49-scaffold_91595_1	AlmA_GroupI	0.00083	15.1	0	0.0011	14.7	0	1.1	1	0	0	1	1	1	1	0
		CH_49-scaffold_4237_6	AlmA_GroupI	0.017	10.8	0	0.54	5.8	0	2.1	2	0	0	2	2	2	0	0
		CH_49-scaffold_13224_4	AlmA_GroupI	0.025	10.2	0.1	0.11	8.1	0	1.8	2	0	0	2	2	2	0	0
		CH_49-scaffold_8726_2	AlmA_GroupIII	8.8e-15	51.3	0	9.9e-10	34.7	0	2.1	2	0	0	2	2	2	2	1
		CH_49-scaffold_91595_1	AlmA_GroupIII	0.0024	13.6	0	0.0031	13.2	0	1.1	1	0	0	1	1	1	1	0
		CH_49-scaffold_2128_12	AlmA_GroupIII	0.0039	12.9	0	0.0065	12.2	0	1.2	1	0	0	1	1	1	1	0
		CH_49-scaffold_1443_21	AlmA_GroupIII	0.016	10.9	0.1	0.024	10.3	0.1	1.2	1	0	0	1	1	1	0	0
		CH_49-scaffold_1178_6	CmdA	1.2e-68	228.9	9.5	2.6e-21	72.3	0.1	4.7	5	0	0	5	5	5	4	1
		CH_49-scaffold_8726_7	CmdA	3.3e-29	98.4	0	1.3e-24	83.3	0	2.9	2	1	1	3	3	3	2	1
		CH_49-scaffold_1178_13	CmdA	1.1e-25	86.7	0	3.5e-17	58.6	0	3.9	3	1	1	4	4	4	3	1
		CH_49-scaffold_258_8	CmdA	1.2e-22	76.8	0.2	3.9e-19	65.1	0.1	4.1	3	1	1	4	4	4	2	1
		CH_49-scaffold_13998_2	CmdA	2.1e-21	72.6	0	3.8e-20	68.4	0	2.4	3	0	0	3	3	3	1	1
		CH_49-scaffold_3060_19	CmdA	3e-11	39	0	5e-07	25	0	2.9	2	1	1	3	3	3	2	1
		CH_49-scaffold_3156_16	CYP153	4.5e-59	197.3	0	5.4e-59	197.1	0	1	1	0	0	1	1	1	1	1
		CH_49-scaffold_6624_8	DszC	9.3e-10	34.7	0	1.4e-09	34.2	0	1.2	1	0	0	1	1	1	1	1
		CH_49-scaffold_12302_3	DszC	2.2e-08	30.2	0.1	3.2e-08	29.7	0.1	1.2	1	0	0	1	1	1	1	1
		CH_49-scaffold_2504_9	DszC	3.2e-08	29.7	0.1	5.1e-08	29	0.1	1.3	1	0	0	1	1	1	1	1
		CH_49-scaffold_1178_6	EbdA	6.4e-77	256.1	14.2	4.4e-30	101.1	0.5	5.1	5	0	0	5	5	5	5	1
		CH_49-scaffold_1178_13	EbdA	2.7e-33	111.7	0.1	3.2e-17	58.5	0	4.6	3	1	1	4	4	4	4	1
		CH_49-scaffold_258_8	EbdA	1.6e-27	92.6	3.8	5.9e-09	31.1	0.1	5.4	5	1	1	6	6	6	5	1
		CH_49-scaffold_8726_7	EbdA	2.6e-25	85.2	0	3.1e-18	61.8	0	4.1	4	0	0	4	4	4	3	1
		CH_49-scaffold_13998_2	EbdA	2.3e-17	58.9	0	6.9e-13	44.1	0	2.5	3	0	0	3	3	3	2	1
		CH_49-scaffold_3060_19	EbdA	1.7e-15	52.7	0	8.9e-06	20.6	0	4	3	1	1	4	4	4	4	1
		CH_49-scaffold_1116_45	EbdA	0.0056	11.3	0	0.11	7	0	2.1	2	0	0	2	2	2	1	0
		CH_49-scaffold_258_23	LadA_alpha	2.3e-10	36.6	0	3.1e-05	19.7	0	2.2	2	0	0	2	2	2	2	1
		CH_49-scaffold_2415_3	LadA_alpha	1.3e-08	30.9	0	5.8e-05	18.8	0	2.4	2	1	1	3	3	3	2	1
		CH_49-scaffold_31846_1	LadA_alpha	9.1e-07	24.8	0.2	0.0099	11.5	0.1	2.1	1	1	0	2	2	2	2	1
		CH_49-scaffold_2415_3	LadA_beta	4.3e-08	29.4	0.1	0.0003	16.7	0	2.1	1	1	1	2	2	2	2	1
		CH_49-scaffold_25541_3	LadA_beta	8.8e-07	25	0	1.4e-06	24.4	0	1.3	1	0	0	1	1	1	1	1
		CH_49-scaffold_12183_1	LadA_beta	2.8e-05	20.1	0	4.5e-05	19.4	0	1.3	1	1	0	1	1	1	1	1
		CH_49-scaffold_12183_1	LadB	1.7e-18	63.6	0	2.3e-18	63.2	0	1.1	1	0	0	1	1	1	1	1
		CH_49-scaffold_258_23	LadB	1.1e-14	51.1	0	1.4e-14	50.7	0	1	1	0	0	1	1	1	1	1
		CH_49-scaffold_2415_3	LadB	3.8e-14	49.3	0	5.8e-14	48.7	0	1.2	1	0	0	1	1	1	1	1
		CH_49-scaffold_25541_3	LadB	3.8e-13	46	0	9.8e-13	44.7	0	1.5	2	0	0	2	2	2	1	1
		CH_49-scaffold_31846_1	LadB	2.5e-11	40	0	3.7e-11	39.5	0	1.2	1	0	0	1	1	1	1	1
		CH_49-scaffold_9282_5	LadB	8.9e-09	31.6	0	1.3e-08	31.1	0	1.2	1	0	0	1	1	1	1	1
		CH_49-scaffold_1751_8	LadB	5.7e-08	29	0	1.1e-06	24.8	0	2.2	2	0	0	2	2	2	1	1
		CH_49-scaffold_12183_11	NdoB	0.0087	11.9	0.1	0.012	11.5	0.1	1.1	1	0	0	1	1	1	1	0
		CH_49-scaffold_3543_1	NdoB	0.027	10.3	0.1	0.076	8.8	0	1.7	2	0	0	2	2	2	0	0
		CH_49-scaffold_12183_11	non_NdoB_type	8.9e-07	25.4	0.2	1.2e-06	24.9	0.2	1.2	1	0	0	1	1	1	1	1
		CH_49-scaffold_3543_1	non_NdoB_type	0.00018	17.8	0.1	0.00027	17.2	0.1	1.2	1	0	0	1	1	1	1	0
CH_50	Nanoarchaeota	CH_50-scaffold_211_73	K27540	0.0021	12.4	0	0.0026	12.1	0	1.1	1	0	0	1	1	1	1	0
CH_51	Desulfobacterota	CH_51-scaffold_26966_5	AhyA	8.4e-25	83.2	0	2.8e-15	51.7	0	3.2	1	1	2	3	3	3	3	1
		CH_51-scaffold_36259_4	AhyA	2.2e-13	45.4	0	5e-09	31	0	2	2	0	0	2	2	2	2	1
		CH_51-scaffold_65308_2	AhyA	9.3e-06	20.2	0	9.5e-06	20.2	0	1	1	0	0	1	1	1	1	1
		CH_51-scaffold_24786_8	AhyA	0.00079	13.8	0	0.001	13.5	0	1.1	1	0	0	1	1	1	1	0
		CH_51-scaffold_94032_1	AlkB	2e-06	23.2	0	2.5e-06	22.9	0	1.1	1	0	0	1	1	1	1	1
		CH_51-scaffold_80865_1	AssA	8.7e-90	298	0	1.1e-89	297.7	0	1.1	1	0	0	1	1	1	1	1
		CH_51-scaffold_80865_1	BssA	1.4e-77	257.6	0	2.2e-77	256.9	0	1.3	1	1	0	1	1	1	1	1
		CH_51-scaffold_26966_5	CmdA	1.6e-14	49	0.1	2.3e-12	41.9	0	2.5	2	1	1	3	3	3	2	1
		CH_51-scaffold_36259_4	CmdA	7.2e-05	17.1	0	0.019	9.1	0	2	2	0	0	2	2	2	2	1
		CH_51-scaffold_24786_8	CmdA	0.00019	15.7	0	0.00023	15.4	0	1.1	1	0	0	1	1	1	1	0
		CH_51-scaffold_65308_2	CmdA	0.012	9.8	0	0.013	9.6	0	1	1	0	0	1	1	1	0	0
		CH_51-scaffold_19919_2	DszC	2.3e-12	42.5	0	4.2e-12	41.7	0	1.3	2	0	0	2	2	2	1	1
		CH_51-scaffold_89434_1	DszC	1.2e-10	36.9	0	1.4e-10	36.6	0	1	1	0	0	1	1	1	1	1
		CH_51-scaffold_43953_2	DszC	1.3e-09	33.5	0	6.9e-05	17.9	0	2.5	2	1	0	2	2	2	2	1
		CH_51-scaffold_42758_4	DszC	1.1e-07	27.2	0	1.8e-07	26.4	0	1.3	1	0	0	1	1	1	1	1
		CH_51-scaffold_20676_5	DszC	6.2e-07	24.6	0	2.1e-06	22.9	0	1.7	1	1	0	1	1	1	1	1
		CH_51-scaffold_30578_3	DszC	1.4e-06	23.5	0	8.8e-05	17.6	0	2.2	2	0	0	2	2	2	2	1
		CH_51-scaffold_60459_4	DszC	1.6e-05	20	0	1.9e-05	19.8	0	1.3	1	0	0	1	1	1	1	1
		CH_51-scaffold_9885_2	DszC	0.0011	14	0	0.0013	13.8	0	1	1	0	0	1	1	1	1	0
		CH_51-scaffold_36259_4	EbdA	6e-13	43.5	0	5.1e-10	33.8	0	2	2	0	0	2	2	2	2	1
		CH_51-scaffold_26966_5	EbdA	2.7e-10	34.7	0	3.1e-06	21.3	0	2.4	2	1	1	3	3	3	2	1
		CH_51-scaffold_24786_8	EbdA	0.00033	14.6	0	0.00044	14.2	0	1.1	1	0	0	1	1	1	1	0
		CH_51-scaffold_65308_2	EbdA	0.0047	10.8	0	0.0047	10.8	0	1	1	0	0	1	1	1	1	0
		CH_51-scaffold_65308_1	EbdA	0.01	9.7	0	0.011	9.6	0	1	1	0	0	1	1	1	0	0
		CH_51-scaffold_80865_1	NmsA	2.2e-65	217.2	0	4.8e-65	216.1	0	1.5	1	1	0	1	1	1	1	1
CH_52_sub	Firmicutes	CH_52_sub-scaffold_1419_24	AlkB	5.4e-05	19.2	0	7.3e-05	18.8	0	1.1	1	0	0	1	1	1	1	1
		CH_52_sub-scaffold_2228_14	AlkB	8.3e-05	18.6	0	8.3e-05	18.6	0	1	1	0	0	1	1	1	1	1
		CH_52_sub-scaffold_10989_4	AlkB	0.0044	12.9	0.3	0.005	12.8	0.3	1.1	1	0	0	1	1	1	1	0
		CH_52_sub-scaffold_4701_6	AlkB	0.024	10.5	0	0.03	10.2	0	1.1	1	0	0	1	1	1	0	0
		CH_52_sub-scaffold_18939_4	AlmA_GroupI	2.2e-05	20.3	0.1	0.0017	14.1	0	2.2	2	0	0	2	2	2	2	1
		CH_52_sub-scaffold_12573_6	AssA	1.3e-42	142.7	0	2.7e-30	102	0	3	2	1	1	3	3	3	3	1
		CH_52_sub-scaffold_12573_6	BssA	5.2e-30	101	0	9.7e-21	70.3	0	3.1	2	1	1	3	3	3	3	1
		CH_52_sub-scaffold_1385_5	CmdA	0.01	10.7	0	0.016	10.1	0	1.3	1	0	0	1	1	1	0	0
		CH_52_sub-scaffold_2456_16	DszC	1.8e-14	50.3	0	1.7e-13	47	0	2	1	1	0	1	1	1	1	1
		CH_52_sub-scaffold_12573_6	NmsA	7.7e-31	103.8	0	4.7e-25	84.6	0	3.1	2	1	1	3	3	3	3	1
		CH_52_sub-scaffold_3084_11	TomA3	0.016	10.8	0.3	0.017	10.7	0.3	1	1	0	0	1	1	1	0	0
CH_53_sub	Planctomycetota	CH_53_sub-scaffold_41679_4	AlkB	2.2e-07	28.1	0	2.2e-07	28.1	0	1	1	0	0	1	1	1	1	1
		CH_53_sub-scaffold_42217_1	AlmA_GroupI	0.016	11.7	0	0.023	11.2	0	1.1	1	0	0	1	1	1	0	0
		CH_53_sub-scaffold_84953_3	AlmA_GroupI	0.045	10.3	0	0.049	10.2	0	1	1	0	0	1	1	1	0	0
		CH_53_sub-scaffold_42217_1	AlmA_GroupIII	0.0098	12.5	0	0.013	12.1	0	1.1	1	0	0	1	1	1	1	0
		CH_53_sub-scaffold_4377_7	AssA	3.4e-122	406.9	0	4.4e-122	406.6	0	1	1	0	0	1	1	1	1	1
		CH_53_sub-scaffold_47746_1	AssA	9.7e-23	77.9	0	1.2e-22	77.7	0	1	1	0	0	1	1	1	1	1
		CH_53_sub-scaffold_4377_7	BssA	1.5e-108	361.7	0	4.1e-108	360.3	0	1.6	1	1	0	1	1	1	1	1
		CH_53_sub-scaffold_47746_1	BssA	2.2e-15	53.5	0	2.6e-15	53.2	0	1	1	0	0	1	1	1	1	1
		CH_53_sub-scaffold_86067_2	CYP153	0.018	11.8	0	0.021	11.6	0	1.1	1	0	0	1	1	1	0	0
		CH_53_sub-scaffold_41174_1	EbdA	0.027	10	0.1	0.026	10	0.1	1	1	0	0	1	1	1	0	0
		CH_53_sub-scaffold_4377_7	NmsA	1.1e-101	339	0	2.2e-101	338	0	1.4	1	1	0	1	1	1	1	1
		CH_53_sub-scaffold_47746_1	NmsA	6.2e-20	68.6	0	8e-20	68.2	0	1	1	0	0	1	1	1	1	1
CH_54_sub	Fusobacteriota	CH_54_sub-scaffold_6139_6	AlkB	1.6e-05	20.8	0	1.6e-05	20.8	0	1	1	0	0	1	1	1	1	1
		CH_54_sub-scaffold_8753_10	AlkB	1.9e-05	20.6	0	1.9e-05	20.6	0	1	1	0	0	1	1	1	1	1
		CH_54_sub-scaffold_404_4	AlkB	0.00036	16.4	0	0.00036	16.4	0	1	1	0	0	1	1	1	1	0
		CH_54_sub-scaffold_3665_17	AssA	1.5e-13	46.5	0	2.5e-12	42.4	0	2.1	1	1	0	1	1	1	1	1
		CH_54_sub-scaffold_2919_7	DszC	3.8e-17	58.9	0.3	8.2e-16	54.5	0.3	2	1	1	0	1	1	1	1	1
		CH_54_sub-scaffold_3288_5	PrmA	0.0015	14.1	0	0.0016	14	0	1	1	0	0	1	1	1	1	0
CH_55_sub	Desulfobacterota	CH_55_sub-scaffold_12930_9	AhyA	1.4e-36	123.1	0	3.2e-27	92.1	0	3.3	2	1	1	3	3	3	3	1
		CH_55_sub-scaffold_17165_10	AlkB	7.5e-07	25.4	0	7.5e-07	25.4	0	1	1	0	0	1	1	1	1	1
		CH_55_sub-scaffold_90172_1	AlmA_GroupI	0.011	11.5	0.1	0.63	5.7	0	2.3	2	0	0	2	2	2	0	0
		CH_55_sub-scaffold_12930_9	CmdA	1.1e-22	76.8	0	4.1e-22	75	0	1.8	1	1	1	2	2	2	1	1
		CH_55_sub-scaffold_34830_3	DszC	1.1e-11	41.1	0.2	2.6e-11	39.9	0.2	1.6	1	1	0	1	1	1	1	1
		CH_55_sub-scaffold_12930_9	EbdA	6.3e-30	100.6	0.1	2.4e-23	78.8	0	3.1	2	1	1	3	3	3	3	1
		CH_55_sub-scaffold_103314_4	NdoC	0.0051	13.6	0.3	0.0057	13.5	0.3	1.1	1	0	0	1	1	1	1	0
		CH_55_sub-scaffold_273507_1	TomA3	0.0023	13.6	0	0.003	13.2	0	1.1	1	0	0	1	1	1	1	0
CH_58_sub	Omnitrophota	CH_58_sub-scaffold_183_55	AlkB	2.7e-05	19.9	0	2.7e-05	19.9	0	1	1	0	0	1	1	1	1	1
		CH_58_sub-scaffold_1371_7	AlmA_GroupI	0.0071	11.7	0	0.01	11.2	0	1.2	1	0	0	1	1	1	1	0
		CH_58_sub-scaffold_3770_8	AlmA_GroupI	0.013	10.8	0.1	0.023	10	0.1	1.3	1	0	0	1	1	1	0	0
		CH_58_sub-scaffold_221_56	AlmA_GroupI	0.017	10.5	0.1	0.025	9.9	0.1	1.3	1	0	0	1	1	1	0	0
		CH_58_sub-scaffold_5120_12	DszC	8.2e-12	41.2	0.1	4.2e-11	38.9	0.1	1.9	1	1	0	1	1	1	1	1
CH_64_sub	Caldisericota	CH_64_sub-scaffold_27674_4	AhyA	3.6e-27	91	1.8	1.3e-12	42.9	0	4.1	3	1	1	4	4	4	4	1
		CH_64_sub-scaffold_5527_14	AlmA_GroupI	0.0031	12.4	0	0.0066	11.3	0	1.5	2	0	0	2	2	2	1	0
		CH_64_sub-scaffold_27674_4	CmdA	9.8e-14	46.4	0.2	2.7e-07	25	0.1	4	3	1	1	4	4	4	4	1
		CH_64_sub-scaffold_983_14	DszC	2e-10	36.1	0.1	7.8e-09	30.9	0	2.1	2	0	0	2	2	2	2	1
		CH_64_sub-scaffold_27674_4	EbdA	1.4e-22	75.4	2.5	1.1e-13	45.9	0	4	3	1	1	4	4	4	4	1
CH_67_sub	Nanoarchaeota	No Matches	N/A															0
CH_68_sub	Acidobacteriota	CH_68_sub-scaffold_714_16	AhyA	1.7e-08	29.9	0	1e-05	20.7	0	3	3	0	0	3	3	3	3	1
		CH_68_sub-scaffold_5277_9	AlkB	6.4	2.4	9	7.9	2.1	9	1.1	1	0	0	1	1	1	0	0
		CH_68_sub-scaffold_94418_3	AlmA_GroupI	0.00033	16.3	0	0.00044	15.9	0	1.1	1	0	0	1	1	1	1	0
		CH_68_sub-scaffold_496_16	AlmA_GroupI	0.00093	14.8	0	0.06	8.9	0	2.1	2	0	0	2	2	2	2	0
		CH_68_sub-scaffold_781_15	AlmA_GroupI	0.0017	13.9	3.3	0.1	8.1	0	3.1	4	0	0	4	4	4	2	0
		CH_68_sub-scaffold_5057_7	AlmA_GroupI	0.016	10.7	0	0.27	6.7	0	2.2	2	0	0	2	2	2	0	0
		CH_68_sub-scaffold_13020_10	AssA	2.6e-140	465.8	0	3.5e-140	465.4	0	1	1	0	0	1	1	1	1	1
		CH_68_sub-scaffold_13020_10	BssA	1.9e-122	406.7	0	2.6e-122	406.3	0	1	1	0	0	1	1	1	1	1
		CH_68_sub-scaffold_714_16	CmdA	0.0035	12.2	0	0.018	9.8	0	1.9	2	0	0	2	2	2	1	0
		CH_68_sub-scaffold_10521_13	DszC	1.5e-20	70.2	0.1	4.2e-19	65.4	0.1	2.1	1	1	0	1	1	1	1	1
		CH_68_sub-scaffold_9006_2	DszC	1.3e-17	60.5	0	3.3e-17	59.2	0	1.5	1	1	0	1	1	1	1	1
		CH_68_sub-scaffold_4075_14	DszC	9.1e-09	31.4	0	4e-07	26	0	2	1	1	0	1	1	1	1	1
		CH_68_sub-scaffold_6680_9	DszC	0.0058	12.3	0	0.098	8.2	0	2	1	1	1	2	2	2	2	0
		CH_68_sub-scaffold_714_16	EbdA	5.6e-06	21.1	0	5.7e-05	17.8	0	2	2	0	0	2	2	2	2	1
		CH_68_sub-scaffold_1329_21	NdoB	0.0014	14.5	0.1	0.0018	14.1	0.1	1.1	1	0	0	1	1	1	1	0
		CH_68_sub-scaffold_13020_10	NmsA	1.5e-112	373.9	0	2e-112	373.5	0	1	1	0	0	1	1	1	1	1
CH_70	Caldatribacteriota	CH_70-scaffold_73063_7	AhyA	1.7e-59	198.1	0	4.1e-26	87.6	0	4	3	1	1	4	4	4	4	1
		CH_70-scaffold_132932_4	AhyA	5.1e-22	74	0	5e-10	34.3	0	4	3	1	1	4	4	4	4	1
		CH_70-scaffold_140882_2	AlkB	1.6e-06	23.5	0	1.9e-06	23.3	0	1.1	1	0	0	1	1	1	1	1
		CH_70-scaffold_48225_2	AlmA_GroupI	0.0032	12.4	0.1	0.05	8.4	0	2.6	3	0	0	3	3	3	1	0
		CH_70-scaffold_31819_3	AlmA_GroupI	0.005	11.7	0	0.0076	11.1	0	1.2	1	0	0	1	1	1	1	0
		CH_70-scaffold_159270_1	AssA	2.4e-76	253.5	0.1	5.2e-55	183	0	2	1	1	1	2	2	2	2	1
		CH_70-scaffold_194844_1	AssA	1.1e-27	92.6	0	1.4e-27	92.2	0	1	1	0	0	1	1	1	1	1
		CH_70-scaffold_159270_2	AssA	9.8e-09	29.9	0	1.2e-08	29.6	0	1	1	0	0	1	1	1	1	1
		CH_70-scaffold_194844_2	AssA	0.0011	13.2	0.1	0.0014	12.9	0.1	1.1	1	0	0	1	1	1	1	0
		CH_70-scaffold_159270_1	BssA	2.3e-70	233.7	0.2	8.9e-52	172.2	0.1	2	2	0	0	2	2	2	2	1
		CH_70-scaffold_194844_1	BssA	2.3e-29	98.1	0	3e-29	97.7	0	1.1	1	0	0	1	1	1	1	1
		CH_70-scaffold_159270_2	BssA	5.3e-15	50.5	0.1	6.3e-15	50.3	0.1	1	1	0	0	1	1	1	1	1
		CH_70-scaffold_73063_7	CmdA	8.8e-33	109.4	0.2	2e-17	58.6	0	4	2	1	1	4	4	4	4	1
		CH_70-scaffold_132932_4	CmdA	1.7e-11	39	0	0.0012	13	0	3.9	3	1	1	4	4	4	4	1
		CH_70-scaffold_73063_7	EbdA	4.8e-42	139.8	0	2.4e-19	64.7	0	4	3	1	1	4	4	4	4	1
		CH_70-scaffold_132932_4	EbdA	3.8e-22	74	0	2.7e-10	34.7	0	3.7	3	1	1	4	4	4	3	1
		CH_70-scaffold_295862_4	K27540	0.001	14.2	0.1	0.0012	14	0.1	1	1	0	0	1	1	1	1	0
		CH_70-scaffold_159270_1	NmsA	1.2e-63	211.5	0.2	2.1e-48	161	0	2	1	1	1	2	2	2	2	1
		CH_70-scaffold_194844_1	NmsA	1.5e-23	78.9	0	6.7e-23	76.7	0	1.8	2	0	0	2	2	2	1	1
		CH_70-scaffold_159270_2	NmsA	3.3e-15	51.3	0.1	3.9e-15	51	0.1	1	1	0	0	1	1	1	1	1
		CH_70-scaffold_63986_8	TmoA_BmoA	3.7e-06	22.3	0	4.8e-06	21.9	0	1.1	1	0	0	1	1	1	1	1
		CH_70-scaffold_63986_8	TomA3	3.2e-07	25.4	0.4	4.5e-07	24.9	0.4	1.1	1	0	0	1	1	1	1	1
CH_71	Bacteroidota	CH_71-scaffold_291_61	AbcA_1	1.5e-39	132.6	0	1.5e-38	129.3	0	2.3	2	1	0	2	2	2	1	1
		CH_71-scaffold_291_61	AbcA_2	2.8e-148	491	3.1	2.9e-139	461.3	0	2.6	1	1	1	2	2	2	2	1
		CH_71-scaffold_3729_1	AlkB	0.042	9.4	2.7	0.078	8.5	2	1.6	1	1	1	2	2	2	0	0
		CH_71-scaffold_801_15	AlkB	1.2	4.5	14.7	1.5	4.3	14.7	1.3	1	0	0	1	1	1	0	0
		CH_71-scaffold_1585_17	AlkB	2.3	3.6	10.5	4.1	2.8	10.5	1.5	1	0	0	1	1	1	0	0
		CH_71-scaffold_2497_15	AlmA_GroupI	0.0011	14.3	0	0.36	6	0	2.7	2	1	1	3	3	3	2	0
		CH_71-scaffold_4796_2	DszC	9.4e-12	40.9	0	1.2e-11	40.6	0	1.2	1	0	0	1	1	1	1	1
		CH_71-scaffold_291_61	K27540	1.7e-45	152.4	0.4	4.8e-44	147.6	0	2.7	2	1	0	2	2	2	1	1
		CH_71-scaffold_977_53	MAH_beta	0.011	12.1	0.9	0.019	11.3	0	1.7	2	0	0	2	2	2	0	0
		CH_71-scaffold_291_50	TmoA_BmoA	0.013	11	0.1	0.013	11	0.1	1	1	0	0	1	1	1	0	0
CH_73	Chloroflexota	CH_73-scaffold_49067_4	AbcA_1	3.4e-20	69.6	0	5.9e-20	68.8	0	1.4	1	1	0	1	1	1	1	1
		CH_73-scaffold_49067_4	AbcA_2	1.1e-32	110.6	0	1.4e-32	110.2	0	1	1	0	0	1	1	1	1	1
		CH_73-scaffold_31084_3	AhyA	8e-14	48.1	0.4	4.4e-12	42.4	0.2	2.1	2	0	0	2	2	2	2	1
		CH_73-scaffold_2796_9	AlkB	0.031	10.6	0.7	0.031	10.6	0.7	1	1	0	0	1	1	1	0	0
		CH_73-scaffold_5886_6	AlkB	0.22	7.8	4.2	0.04	10.2	0.8	1.5	2	0	0	2	2	2	0	0
		CH_73-scaffold_8696_7	AlmA_GroupI	0.0038	13.4	0	2.4	4.1	0	3.1	3	0	0	3	3	3	3	0
		CH_73-scaffold_20055_1	AlmA_GroupI	0.0087	12.2	0	0.012	11.7	0	1.1	1	0	0	1	1	1	1	0
		CH_73-scaffold_25420_2	AlmA_GroupI	0.024	10.7	0	0.041	9.9	0	1.3	1	0	0	1	1	1	0	0
		CH_73-scaffold_33807_1	AlmA_GroupI	0.036	10.1	0.6	0.47	6.5	0	2.5	2	1	1	3	3	3	0	0
		CH_73-scaffold_2147_15	AlmA_GroupIII	0.005	13	0	0.0051	13	0	1	1	0	0	1	1	1	1	0
		CH_73-scaffold_172885_3	AlmA_GroupIII	0.0096	12.1	0	0.022	10.9	0	1.6	2	0	0	2	2	2	1	0
		CH_73-scaffold_8696_7	AlmA_GroupIII	0.023	10.8	0	1.5	4.9	0	2.8	3	0	0	3	3	3	0	0
		CH_73-scaffold_42883_4	AlmA_GroupIII	0.024	10.7	0	0.035	10.2	0	1.2	1	0	0	1	1	1	0	0
		CH_73-scaffold_25420_2	AlmA_GroupIII	0.026	10.6	0.2	0.049	9.7	0.1	1.5	2	0	0	2	2	2	0	0
		CH_73-scaffold_31084_3	EbdA	1.2e-10	37.2	3.5	1.9e-09	33.2	0.6	2.6	3	0	0	3	3	3	2	1
		CH_73-scaffold_49067_4	K27540	1.1e-29	101.1	0	1.2e-29	100.9	0	1	1	0	0	1	1	1	1	1
		CH_73-scaffold_69980_2	LadB	3.3e-10	36.8	0	1.2e-08	31.7	0	2.1	2	0	0	2	2	2	2	1
		CH_73-scaffold_4606_10	LadB	0.0054	13.1	0	0.0094	12.3	0	1.4	2	0	0	2	2	2	1	0
		CH_73-scaffold_521_29	pBmoC	0.0019	15.3	1.9	0.0026	14.8	1.9	1.3	1	0	0	1	1	1	1	0
CH_73_sub	-	CH_73_sub-scaffold_922_6	AbcA_1	5.1e-19	64.2	0	6.2e-19	63.9	0	1	1	0	0	1	1	1	1	1
		CH_73_sub-scaffold_922_6	AbcA_2	1.1e-28	95.9	1.2	1e-27	92.7	0.2	2	1	1	0	2	2	2	2	1
		CH_73_sub-scaffold_922_6	K27540	2e-30	102	0.1	2.4e-30	101.7	0.1	1	1	0	0	1	1	1	1	1
CH_74	Bipolaricaulota	CH_74-scaffold_76090_1	AlkB	2.7e-07	26.4	0	2.7e-07	26.4	0	1	1	0	0	1	1	1	1	1
		CH_74-scaffold_65640_3	AlkB	7.8e-06	21.6	0	7.8e-06	21.6	0	1	1	0	0	1	1	1	1	1
		CH_74-scaffold_66692_3	AlkB	7.8e-06	21.6	0	7.8e-06	21.6	0	1	1	0	0	1	1	1	1	1
		CH_74-scaffold_32522_7	AlmA_GroupI	0.0051	12.1	0	0.0065	11.7	0	1.1	1	0	0	1	1	1	1	0
		CH_74-scaffold_5050_1	AssA	2.3e-65	217.6	0	2.6e-65	217.4	0	1	1	0	0	1	1	1	1	1
		CH_74-scaffold_227394_2	AssA	2.6e-40	134.7	0	2.9e-40	134.6	0	1	1	0	0	1	1	1	1	1
		CH_74-scaffold_227394_1	AssA	8.7e-20	66.8	0	1.1e-19	66.5	0	1	1	0	0	1	1	1	1	1
		CH_74-scaffold_5050_1	BssA	7.3e-64	212.5	0	8.8e-64	212.3	0	1	1	0	0	1	1	1	1	1
		CH_74-scaffold_227394_2	BssA	7.2e-35	116.6	0	8.9e-35	116.3	0	1	1	0	0	1	1	1	1	1
		CH_74-scaffold_227394_1	BssA	1.7e-17	59.1	0	3.2e-17	58.2	0	1.3	1	1	0	1	1	1	1	1
		CH_74-scaffold_5050_1	NmsA	3.3e-62	207.1	0	4e-62	206.8	0	1	1	0	0	1	1	1	1	1
		CH_74-scaffold_227394_2	NmsA	8e-33	109.9	0	9.6e-33	109.6	0	1	1	0	0	1	1	1	1	1
		CH_74-scaffold_227394_1	NmsA	1.5e-12	42.9	0	1.8e-12	42.6	0	1.2	1	0	0	1	1	1	1	1
		CH_74-scaffold_13539_3	pBmoA	0.0062	12.8	0.7	0.0077	12.5	0.7	1.1	1	0	0	1	1	1	1	0
CH_75	Desulfobacterota	CH_75-scaffold_1318_12	AhyA	1.7e-26	89.5	0.2	2.2e-09	32.8	0	4	3	1	1	4	4	4	4	1
		CH_75-scaffold_1318_5	AhyA	6.6e-24	80.9	0	3.1e-09	32.3	0	4	3	1	1	4	4	4	4	1
		CH_75-scaffold_112_34	AhyA	5.4e-13	44.8	0.1	4.3e-10	35.2	0	2.9	2	1	0	2	2	2	2	1
		CH_75-scaffold_112_35	AhyA	4.1e-06	22	0.2	1.2e-05	20.4	0.1	1.7	1	1	0	2	2	2	1	1
		CH_75-scaffold_1318_6	AhyA	5e-05	18.4	0	6.4e-05	18.1	0	1.1	1	0	0	1	1	1	1	1
		CH_75-scaffold_1318_11	AhyA	0.00065	14.7	0	0.00071	14.6	0	1	1	0	0	1	1	1	1	0
		CH_75-scaffold_4375_1	AlkB	5e-06	22.5	0	6.9e-06	22	0	1.1	1	0	0	1	1	1	1	1
		CH_75-scaffold_263_25	AlmA_GroupI	2.7e-05	19.9	0.1	8.1e-05	18.3	0	1.7	1	1	1	2	2	2	1	1
		CH_75-scaffold_37158_2	AlmA_GroupI	0.021	10.3	2.1	0.56	5.6	0.1	2.6	2	1	1	3	3	3	0	0
		CH_75-scaffold_12682_5	AlmA_GroupI	0.086	8.3	2.6	0.5	5.8	0.1	2.8	3	1	1	4	4	4	0	0
		CH_75-scaffold_2265_4	AlmA_GroupIII	0.013	11	0	0.16	7.4	0	2	2	0	0	2	2	2	0	0
		CH_75-scaffold_36622_1	AssA	2.2e-105	350.3	0	2.5e-105	350	0	1	1	0	0	1	1	1	1	1
		CH_75-scaffold_2388_15	AssA	1e-90	301.8	0	1.4e-90	301.2	0	1.2	1	0	0	1	1	1	1	1
		CH_75-scaffold_28310_4	AssA	4.5e-84	279.8	0	9.9e-84	278.6	0	1.4	1	1	0	1	1	1	1	1
		CH_75-scaffold_92011_3	AssA	8.4e-07	24.1	0	9.7e-07	23.9	0	1	1	0	0	1	1	1	1	1
		CH_75-scaffold_36622_1	BssA	7.8e-91	302.1	0	9.9e-91	301.7	0	1.1	1	0	0	1	1	1	1	1
		CH_75-scaffold_28310_4	BssA	7.8e-78	259	0	1.3e-77	258.3	0	1.3	1	1	0	1	1	1	1	1
		CH_75-scaffold_2388_15	BssA	6.8e-74	246	0	3.4e-73	243.7	0	1.8	1	1	0	1	1	1	1	1
		CH_75-scaffold_92011_3	BssA	9.9e-13	43.7	0	9.9e-13	43.7	0	1	1	0	0	1	1	1	1	1
		CH_75-scaffold_1318_12	CmdA	3.1e-14	48.7	0.1	8.1e-05	17.5	0	3.9	3	1	1	4	4	4	4	1
		CH_75-scaffold_1318_5	CmdA	5.4e-14	47.9	0.1	0.0003	15.7	0	4	3	1	1	4	4	4	4	1
		CH_75-scaffold_112_34	CmdA	2.6e-07	25.8	0.1	9e-07	24	0.1	1.7	1	1	0	1	1	1	1	1
		CH_75-scaffold_112_35	CmdA	0.0013	13.5	0.1	0.0016	13.3	0.1	1.1	1	0	0	1	1	1	1	0
		CH_75-scaffold_5868_1	DszC	2.9e-17	59.3	0.1	6.4e-15	51.6	0	2.1	1	1	1	2	2	2	2	1
		CH_75-scaffold_35966_2	DszC	6.9e-15	51.5	0	1.9e-13	46.7	0	2.1	1	1	0	1	1	1	1	1
		CH_75-scaffold_1563_30	DszC	1e-12	44.4	0	5.9e-12	41.8	0	1.9	2	0	0	2	2	2	1	1
		CH_75-scaffold_9777_5	DszC	1.6e-12	43.7	0	2.2e-12	43.3	0	1.1	1	0	0	1	1	1	1	1
		CH_75-scaffold_1563_9	DszC	4.8e-12	42.1	0	7.3e-12	41.5	0	1.2	1	0	0	1	1	1	1	1
		CH_75-scaffold_2941_2	DszC	1.1e-10	37.6	0	3.4e-10	36	0	1.6	2	0	0	2	2	2	1	1
		CH_75-scaffold_13767_9	DszC	3.7e-10	35.9	0.1	2.2e-09	33.3	0.1	1.9	1	1	0	1	1	1	1	1
		CH_75-scaffold_1472_17	DszC	1.7e-09	33.7	0.2	1.7e-08	30.4	0.2	1.9	1	1	0	1	1	1	1	1
		CH_75-scaffold_4400_15	DszC	9e-09	31.3	0.4	2.9e-08	29.6	0.3	1.7	2	0	0	2	2	2	1	1
		CH_75-scaffold_12029_5	DszC	1.1e-08	31.1	0	2.3e-08	30	0	1.5	2	0	0	2	2	2	1	1
		CH_75-scaffold_2246_5	DszC	3.2e-07	26.2	0	1.3e-06	24.2	0	1.9	2	1	0	2	2	2	1	1
		CH_75-scaffold_3313_16	DszC	5.4e-07	25.5	0	7e-07	25.1	0	1.1	1	0	0	1	1	1	1	1
		CH_75-scaffold_9551_5	DszC	8.6e-07	24.8	0	0.0049	12.4	0	2.9	3	0	0	3	3	3	2	1
		CH_75-scaffold_9777_4	DszC	1.6e-06	23.9	0	2.1e-06	23.5	0	1.1	1	0	0	1	1	1	1	1
		CH_75-scaffold_8215_7	DszC	1.7e-06	23.9	0	3e-06	23	0	1.4	1	0	0	1	1	1	1	1
		CH_75-scaffold_263_5	DszC	1.2e-05	21	0	2e-05	20.3	0	1.3	1	0	0	1	1	1	1	1
		CH_75-scaffold_1469_11	DszC	8e-05	18.3	0	0.00039	16.1	0	1.9	2	1	0	2	2	2	1	1
		CH_75-scaffold_5868_3	DszC	0.00015	17.4	0	0.00036	16.2	0	1.6	1	1	0	1	1	1	1	0
		CH_75-scaffold_89112_4	DszC	0.0005	15.7	0	0.029	9.9	0	2.7	3	0	0	3	3	3	1	0
		CH_75-scaffold_1318_12	EbdA	3.7e-25	84.6	0	7.2e-10	34	0	4	2	1	2	4	4	4	4	1
		CH_75-scaffold_1318_5	EbdA	3.1e-23	78.2	0	6.1e-09	30.9	0	4	2	1	1	4	4	4	4	1
		CH_75-scaffold_112_34	EbdA	3.5e-12	41.7	0.1	1.2e-10	36.5	0.1	2.6	2	1	0	2	2	2	2	1
		CH_75-scaffold_112_35	EbdA	5e-06	21.3	0.1	7.8e-06	20.6	0.1	1.3	1	0	0	1	1	1	1	1
		CH_75-scaffold_16429_4	MAH_beta	0.0028	14.2	0.3	0.0046	13.5	0.3	1.3	1	0	0	1	1	1	1	0
		CH_75-scaffold_36622_1	NmsA	3.3e-86	286.7	0	4e-86	286.5	0	1	1	0	0	1	1	1	1	1
		CH_75-scaffold_2388_15	NmsA	4.6e-71	236.7	0	1.7e-70	234.8	0	1.7	1	1	0	1	1	1	1	1
		CH_75-scaffold_28310_4	NmsA	1.3e-64	215.3	0	3.3e-64	214	0	1.5	1	1	0	1	1	1	1	1
		CH_75-scaffold_92011_3	NmsA	7.3e-10	34.2	0.1	8e-10	34.1	0.1	1.1	1	0	0	1	1	1	1	1
CH_76	Aenigmarchaeota	CH_76-scaffold_27_105	AlkB	0.0065	11	0.3	0.0072	10.8	0.3	1	1	0	0	1	1	1	1	0
		CH_76-scaffold_1_51	AlmA_GroupI	8.6e-07	23.5	0.6	0.0087	10.3	0	3	2	1	1	3	3	3	3	1
CH_80	Acidobacteriota	CH_80-scaffold_6623_1	AlmA_GroupI	0.00077	15.2	2.6	0.41	6.2	0	3.4	4	0	0	4	4	4	2	0
		CH_80-scaffold_2182_20	AlmA_GroupI	0.0026	13.5	0	0.0091	11.7	0	1.8	2	0	0	2	2	2	1	0
		CH_80-scaffold_2652_13	AlmA_GroupI	0.0026	13.5	0	0.0046	12.7	0	1.3	1	0	0	1	1	1	1	0
		CH_80-scaffold_3722_6	AlmA_GroupI	0.0092	11.7	0	0.015	11	0	1.3	1	0	0	1	1	1	1	0
		CH_80-scaffold_2134_7	AlmA_GroupI	0.014	11.1	0.1	0.059	9	0	1.8	2	0	0	2	2	2	0	0
		CH_80-scaffold_2652_13	AlmA_GroupIII	1.2e-05	21.3	0.1	2.1e-05	20.4	0.1	1.4	1	0	0	1	1	1	1	1
		CH_80-scaffold_3775_13	AssA	2.1e-132	439.8	0	2.8e-132	439.4	0	1	1	0	0	1	1	1	1	1
		CH_80-scaffold_3775_13	BssA	1.9e-121	403.5	0	2.7e-121	403	0	1.1	1	0	0	1	1	1	1	1
		CH_80-scaffold_880_22	DszC	4.7e-12	42.3	0.1	1.6e-11	40.6	0.1	1.8	1	1	0	1	1	1	1	1
		CH_80-scaffold_1352_13	DszC	8e-12	41.6	0	1.3e-11	40.9	0	1.3	1	0	0	1	1	1	1	1
		CH_80-scaffold_522_26	DszC	1e-11	41.3	0	4.3e-11	39.2	0	1.9	1	1	0	1	1	1	1	1
		CH_80-scaffold_3775_13	NmsA	8.4e-113	374.9	0	1.1e-112	374.5	0	1	1	0	0	1	1	1	1	1
		CH_80-scaffold_4694_5	pBmoA	0.018	11.7	0	0.028	11.1	0	1.2	1	0	0	1	1	1	0	0
		CH_80-scaffold_3819_9	TomA3	0.013	11.1	0.2	0.013	11.1	0.2	1.1	1	0	0	1	1	1	0	0
CH_81	Marinisomatota	CH_81-scaffold_759_6	AlkB	1.5e-05	21.2	0	1.5e-05	21.2	0	1	1	0	0	1	1	1	1	1
		CH_81-scaffold_37223_6	DszC	2.5e-05	20.3	0	3e-05	20	0	1.1	1	0	0	1	1	1	1	1
		CH_81-scaffold_5789_10	PrmC	0.0089	12.4	0	0.011	12.1	0	1	1	0	0	1	1	1	1	0
CH_84	Patescibacteria	CH_84-scaffold_49580_5	AlkB	1.6	2.1	8.2	2.2	1.7	8.2	1.2	1	0	0	1	1	1	0	0
		CH_84-scaffold_15643_4	AlkB	2.3	1.6	9.1	2.8	1.3	9.1	1.1	1	0	0	1	1	1	0	0
CH_85	Patescibacteria	CH_85-scaffold_91162_1	AssA	1.3e-41	136.9	0	1.9e-41	136.4	0	1.2	1	0	0	1	1	1	1	1
		CH_85-scaffold_91162_1	BssA	1e-41	137.2	0.2	2.7e-29	96.1	0	2.1	1	1	1	2	2	2	2	1
		CH_85-scaffold_91162_1	NmsA	3e-34	112.5	0.5	7.5e-32	104.6	0.5	2.6	1	1	0	1	1	1	1	1
CH_86	Zixibacteria	CH_86-scaffold_232_9	AhyA	0.016	10.5	0	0.021	10.1	0	1.3	1	1	0	1	1	1	0	0
		CH_86-scaffold_399_5	AlkB	0.00044	16.5	0	0.00045	16.4	0	1	1	0	0	1	1	1	1	0
		CH_86-scaffold_232_44	AlkB	0.83	5.6	6.7	0.025	10.7	0.5	1.6	2	0	0	2	2	2	0	0
		CH_86-scaffold_8586_6	AlkB	6.4	2.7	10.7	9.4	2.2	10.7	1.2	1	0	0	1	1	1	0	0
		CH_86-scaffold_769_8	AlmA_GroupI	0.0071	12.2	0	0.0074	12.2	0	1	1	0	0	1	1	1	1	0
		CH_86-scaffold_769_8	AlmA_GroupIII	0.0066	12.4	0	0.0068	12.3	0	1	1	0	0	1	1	1	1	0
		CH_86-scaffold_769_16	AssA	1.2e-131	437.5	0	1.4e-131	437.3	0	1	1	0	0	1	1	1	1	1
		CH_86-scaffold_769_16	BssA	8.6e-119	394.9	0	1.4e-118	394.2	0	1.3	1	0	0	1	1	1	1	1
		CH_86-scaffold_8635_1	DszC	1.1e-18	64.3	0.1	5.1e-17	58.8	0.1	2	1	1	0	1	1	1	1	1
		CH_86-scaffold_7114_3	DszC	8.3e-17	58.2	0	1.4e-14	50.8	0	2.1	2	0	0	2	2	2	2	1
		CH_86-scaffold_2600_7	DszC	2.3e-12	43.5	0	3.5e-12	42.9	0	1.4	1	1	0	1	1	1	1	1
		CH_86-scaffold_4229_1	DszC	1.4e-08	31	0	5.8e-08	29	0	1.9	1	1	0	1	1	1	1	1
		CH_86-scaffold_6358_2	DszC	0.02	10.8	0.1	0.02	10.8	0.1	3.2	4	0	0	4	4	4	0	0
		CH_86-scaffold_709_34	NdoB	0.0029	13.7	0	0.0031	13.6	0	1	1	0	0	1	1	1	1	0
		CH_86-scaffold_769_16	NmsA	2.3e-116	386.8	0	3e-116	386.5	0	1.1	1	0	0	1	1	1	1	1
		CH_86-scaffold_709_34	non_NdoB_type	0.0041	13.5	0	0.0041	13.5	0	1.1	1	0	0	1	1	1	1	0
		CH_86-scaffold_1129_3	TomA3	0.031	10	2.9	0.069	8.8	0.3	2	1	1	1	2	2	2	0	0
CH_87_sub	Planctomycetota	CH_87_sub-scaffold_50259_2	AbcA_1	1.1e-43	146.8	0	1.6e-42	143	0	1.9	1	1	0	1	1	1	1	1
		CH_87_sub-scaffold_43206_3	AbcA_1	5.6e-31	104.9	0	7.3e-31	104.5	0	1	1	0	0	1	1	1	1	1
		CH_87_sub-scaffold_43206_2	AbcA_1	0.023	10.5	0	0.026	10.3	0	1	1	0	0	1	1	1	0	0
		CH_87_sub-scaffold_50259_2	AbcA_2	7.4e-127	420.9	0	8.9e-127	420.7	0	1	1	0	0	1	1	1	1	1
		CH_87_sub-scaffold_43206_3	AbcA_2	3e-87	290.3	0	3.6e-87	290	0	1	1	0	0	1	1	1	1	1
		CH_87_sub-scaffold_43206_2	AbcA_2	6.2e-15	51.8	0	7e-15	51.6	0	1	1	0	0	1	1	1	1	1
		CH_87_sub-scaffold_40075_2	AhyA	5.3e-26	88.2	0	5e-11	38.6	0	4	3	1	1	4	4	4	4	1
		CH_87_sub-scaffold_52929_3	AlmA_GroupI	9.5e-06	21.7	0	0.04	9.7	0	2.3	2	0	0	2	2	2	2	1
		CH_87_sub-scaffold_15340_5	AlmA_GroupI	0.0024	13.7	0.2	1.6	4.4	0	3	3	0	0	3	3	3	2	0
		CH_87_sub-scaffold_95845_1	AlmA_GroupI	0.0055	12.6	0.1	0.0072	12.2	0.1	1.1	1	0	0	1	1	1	1	0
		CH_87_sub-scaffold_45523_4	AlmA_GroupI	0.0091	11.9	0.1	0.013	11.3	0.1	1.1	1	0	0	1	1	1	1	0
		CH_87_sub-scaffold_95845_1	AlmA_GroupIII	0.007	12.3	0	0.0086	12	0	1.1	1	0	0	1	1	1	1	0
		CH_87_sub-scaffold_52929_3	AlmA_GroupIII	0.017	11	0	1.4	4.7	0	2.1	2	0	0	2	2	2	0	0
		CH_87_sub-scaffold_59468_1	AssA	6.3e-121	402	0	7.2e-121	401.8	0	1	1	0	0	1	1	1	1	1
		CH_87_sub-scaffold_59468_1	BssA	1e-108	361.6	0	1.9e-108	360.7	0	1.3	1	1	0	1	1	1	1	1
		CH_87_sub-scaffold_40075_2	CmdA	8.4e-13	44.3	0	0.00015	17	0	4	2	1	2	4	4	4	4	1
		CH_87_sub-scaffold_19540_5	DszC	3e-06	23.4	0.1	8.5e-06	21.9	0.1	1.9	1	1	0	1	1	1	1	1
		CH_87_sub-scaffold_49143_2	DszC	5.2e-05	19.3	0	0.00022	17.2	0	1.9	2	1	0	2	2	2	1	1
		CH_87_sub-scaffold_40075_2	EbdA	2.4e-27	92.2	0.1	4.1e-10	35.1	0	4	3	1	1	4	4	4	4	1
		CH_87_sub-scaffold_50259_2	K27540	8.9e-54	180.3	0	2.8e-52	175.3	0	2	1	1	0	1	1	1	1	1
		CH_87_sub-scaffold_43206_3	K27540	6.7e-42	141.1	0	8.4e-42	140.8	0	1	1	0	0	1	1	1	1	1
		CH_87_sub-scaffold_43206_2	K27540	0.0013	14.9	0	0.0014	14.7	0	1	1	0	0	1	1	1	1	0
		CH_87_sub-scaffold_76162_2	NdoB	0.011	11.9	0	0.017	11.1	0	1.3	1	0	0	1	1	1	0	0
		CH_87_sub-scaffold_59468_1	NmsA	1.9e-102	340.8	0	2.5e-102	340.4	0	1.1	1	0	0	1	1	1	1	1
		CH_87_sub-scaffold_41418_2	sBmoZ	0.0029	14.8	0	0.0044	14.2	0	1.3	1	0	0	1	1	1	1	0
		CH_87_sub-scaffold_20182_4	TomA3	0.00096	15	0.2	0.0011	14.8	0.2	1.1	1	0	0	1	1	1	1	0
CH_88	Crearchaeota	CH_88-scaffold_11325_7	AbcA_1	1.5e-16	57.3	0	2.6e-16	56.6	0	1.3	1	1	0	1	1	1	1	1
		CH_88-scaffold_6454_3	AbcA_1	8.6e-12	41.6	0	1.1e-11	41.4	0	1.1	1	0	0	1	1	1	1	1
		CH_88-scaffold_11325_7	AbcA_2	3.8e-49	164.7	0.2	1.6e-48	162.6	0	1.7	1	1	0	2	2	2	1	1
		CH_88-scaffold_6454_3	AbcA_2	3.8e-30	102	0.1	1.6e-28	96.7	0	2.2	1	1	1	2	2	2	2	1
		CH_88-scaffold_2285_8	AhyA	1.3e-35	120	0	7.8e-26	87.7	0	3.5	3	1	1	4	4	4	3	1
		CH_88-scaffold_3338_5	AhyA	1.4e-35	120	0	8.3e-21	71	0	4	3	1	1	4	4	4	4	1
		CH_88-scaffold_3875_6	AhyA	3.2e-32	108.8	0	1.9e-11	40.1	0	4	3	1	1	4	4	4	4	1
		CH_88-scaffold_29893_8	AlkB	0.00024	17.4	0	0.00024	17.4	0	1	1	0	0	1	1	1	1	0
		CH_88-scaffold_6971_13	AlmA_GroupI	0.00015	17.8	0.3	0.019	10.8	0	2.8	1	1	2	3	3	3	1	0
		CH_88-scaffold_7711_7	AlmA_GroupI	0.00066	15.6	0	0.00092	15.2	0	1.2	1	0	0	1	1	1	1	0
		CH_88-scaffold_15000_4	AlmA_GroupI	0.0031	13.4	0	0.0042	13	0	1.2	1	0	0	1	1	1	1	0
		CH_88-scaffold_2425_16	AlmA_GroupI	0.019	10.8	0.3	1.7	4.4	0	2.8	3	0	0	3	3	3	0	0
		CH_88-scaffold_16101_8	AlmA_GroupI	0.025	10.5	0	0.26	7.1	0	2.1	2	0	0	2	2	2	0	0
		CH_88-scaffold_21656_4	AlmA_GroupI	0.042	9.7	0.7	0.14	8	0	1.9	2	0	0	2	2	2	0	0
		CH_88-scaffold_7711_7	AlmA_GroupIII	0.0033	13.4	0	0.005	12.8	0	1.2	1	0	0	1	1	1	1	0
		CH_88-scaffold_2285_8	CmdA	2.4e-28	95.8	0.2	1.1e-17	60.5	0	3	3	0	0	3	3	3	3	1
		CH_88-scaffold_3338_5	CmdA	1.8e-14	49.9	0.1	9.1e-09	31	0	3	3	0	0	3	3	3	3	1
		CH_88-scaffold_3875_6	CmdA	4.5e-14	48.6	0.1	3.3e-07	25.8	0	3.1	1	1	2	3	3	3	3	1
		CH_88-scaffold_4029_2	DszC	1.2e-16	57.7	0.3	9.2e-16	54.8	0.3	2	1	1	0	1	1	1	1	1
		CH_88-scaffold_3875_6	EbdA	1e-27	93.4	0.1	3.1e-10	35.6	0	3.9	3	1	1	4	4	4	3	1
		CH_88-scaffold_3338_5	EbdA	3.3e-24	81.8	0	2.5e-12	42.5	0	4	3	1	1	4	4	4	4	1
		CH_88-scaffold_2285_8	EbdA	1.1e-20	70.1	0	4.2e-15	51.7	0	3.1	3	1	1	4	4	4	2	1
		CH_88-scaffold_11325_7	K27540	4.6e-29	98.8	0	5.4e-29	98.6	0	1.1	1	0	0	1	1	1	1	1
		CH_88-scaffold_6454_3	K27540	7.4e-24	81.6	0	1e-23	81.2	0	1.1	1	0	0	1	1	1	1	1
		CH_88-scaffold_36989_2	LadA_alpha	5.5e-10	35.6	0	7.6e-05	18.7	0	2.1	1	1	1	2	2	2	2	1
		CH_88-scaffold_3875_11	LadA_alpha	5.1e-09	32.4	0	0.00012	18	0	2.3	1	1	1	2	2	2	2	1
		CH_88-scaffold_3875_10	LadA_alpha	0.0023	13.8	0	0.0063	12.4	0	1.6	1	1	0	1	1	1	1	0
		CH_88-scaffold_36989_2	LadA_beta	5.3e-14	49.1	0	6e-08	29.1	0	2.2	1	1	1	2	2	2	2	1
		CH_88-scaffold_3875_11	LadA_beta	1.3e-09	34.7	0	6.4e-06	22.5	0	2.1	1	1	1	2	2	2	2	1
		CH_88-scaffold_3875_10	LadA_beta	5.9e-06	22.6	0	0.00021	17.4	0	2	1	1	1	2	2	2	2	1
		CH_88-scaffold_36989_2	LadB	8.8e-22	74.7	0	8e-21	71.5	0	1.9	1	1	1	2	2	2	1	1
		CH_88-scaffold_3875_10	LadB	9.1e-19	64.7	0	1.2e-18	64.3	0	1.1	1	0	0	1	1	1	1	1
		CH_88-scaffold_3875_11	LadB	2e-17	60.4	0	3.6e-16	56.2	0	2	1	1	1	2	2	2	1	1
		CH_88-scaffold_1573_13	LadB	1.4e-08	31.2	0	2.4e-08	30.5	0	1.3	1	0	0	1	1	1	1	1
		CH_88-scaffold_29893_6	MAH_alpha	0.011	11.7	0.1	0.014	11.4	0.1	1.1	1	0	0	1	1	1	0	0
		CH_88-scaffold_29893_6	NdoB	0.026	10.6	0.2	0.035	10.2	0.2	1.1	1	0	0	1	1	1	0	0
		CH_88-scaffold_10893_2	NdoC	0.0054	13.7	0.5	0.047	10.7	0.1	2	1	1	0	2	2	2	1	0
		CH_88-scaffold_29893_6	non_NdoB_type	2.2e-09	34.2	0.1	2.8e-09	33.9	0.1	1.2	1	0	0	1	1	1	1	1
		CH_88-scaffold_6971_7	pBmoC	0.04	10.7	5.8	0.018	11.8	1.4	2.4	1	1	2	3	3	3	0	0
CH_89_sub	Nanoarchaeota	CH_89_sub-scaffold_12246_10	AlkB	0.017	10.4	3.5	0.018	10.3	0.1	2.1	2	0	0	2	2	2	0	0
		CH_89_sub-scaffold_2548_16	AlkB	0.36	6.1	8.8	0.48	5.6	8.8	1.1	1	0	0	1	1	1	0	0
		CH_89_sub-scaffold_3061_14	AlkB	2	3.6	8.6	2.3	3.4	8.6	1.1	1	0	0	1	1	1	0	0
		CH_89_sub-scaffold_2412_26	LadA_alpha	0.0075	11.3	0	0.0088	11.1	0	1.1	1	0	0	1	1	1	1	0
CH_91_sub	Bacteroidota	CH_91_sub-scaffold_227929_1	AhyA	4.1e-14	49.2	0.4	5e-10	35.6	0	2	1	1	1	2	2	2	2	1
		CH_91_sub-scaffold_227929_2	AhyA	6.3e-11	38.6	0	3.2e-05	19.8	0	2	2	0	0	2	2	2	2	1
		CH_91_sub-scaffold_105998_2	AlkB	1.4e-07	28.3	0.3	1.8e-07	28	0.3	1.1	1	0	0	1	1	1	1	1
		CH_91_sub-scaffold_29332_3	AlmA_GroupI	0.00032	17	0	0.11	8.6	0	2.1	2	0	0	2	2	2	2	0
		CH_91_sub-scaffold_7860_2	AlmA_GroupI	0.02	11.1	0	0.19	7.9	0	2	2	0	0	2	2	2	0	0
		CH_91_sub-scaffold_93658_1	AlmA_GroupIII	0.0013	15.1	0.6	0.021	11	0.1	2.4	2	0	0	2	2	2	1	0
		CH_91_sub-scaffold_29332_3	AlmA_GroupIII	0.0045	13.3	0.6	0.069	9.3	0.1	2.5	2	1	1	3	3	3	1	0
		CH_91_sub-scaffold_30159_5	AlmA_GroupIII	0.0076	12.5	0	0.01	12.1	0	1.1	1	0	0	1	1	1	1	0
		CH_91_sub-scaffold_7860_2	AlmA_GroupIII	0.021	11	0	0.32	7.2	0	2	2	0	0	2	2	2	0	0
		CH_91_sub-scaffold_24777_1	AssA	2.7e-96	320.9	0	3.5e-96	320.5	0	1	1	0	0	1	1	1	1	1
		CH_91_sub-scaffold_24777_1	BssA	7.2e-77	256.5	0	9e-77	256.2	0	1	1	0	0	1	1	1	1	1
		CH_91_sub-scaffold_227929_1	CmdA	8.2e-07	24.8	0.1	5e-06	22.2	0	1.8	1	1	1	2	2	2	1	1
		CH_91_sub-scaffold_227929_2	CmdA	1.9e-06	23.6	0	0.0086	11.5	0	2.1	2	0	0	2	2	2	2	1
		CH_91_sub-scaffold_12822_15	DszC	5.5e-21	72.2	0.2	7.4e-21	71.8	0.2	1.1	1	0	0	1	1	1	1	1
		CH_91_sub-scaffold_90988_2	DszC	2e-15	53.9	0	3.2e-15	53.2	0	1.2	1	0	0	1	1	1	1	1
		CH_91_sub-scaffold_24969_13	DszC	3.6e-08	30	2.4	1.7e-06	24.6	2.4	2.1	1	1	0	1	1	1	1	1
		CH_91_sub-scaffold_23717_4	DszC	6.1e-07	26	0	1.5e-06	24.7	0	1.6	2	0	0	2	2	2	1	1
		CH_91_sub-scaffold_227929_2	EbdA	4.9e-10	35.2	0	3e-06	22.7	0	2	2	0	0	2	2	2	2	1
		CH_91_sub-scaffold_227929_1	EbdA	1.7e-08	30.1	1	6.4e-05	18.3	0.1	2	1	1	1	2	2	2	2	1
		CH_91_sub-scaffold_21602_7	LadB	0.0059	13	1.4	0.007	12.8	1.4	1.3	1	0	0	1	1	1	1	0
		CH_91_sub-scaffold_24777_1	NmsA	9.6e-71	236.3	0	1.3e-70	235.9	0	1	1	0	0	1	1	1	1	1
CH_93	Desulfobacterota	CH_93-scaffold_49996_1	AhyA	5.7e-39	130.8	0	1.6e-24	83	0	4.1	3	1	1	4	4	4	4	1
		CH_93-scaffold_62739_1	AhyA	4e-28	94.9	1	2.6e-16	55.8	0	4	3	1	1	4	4	4	4	1
		CH_93-scaffold_66860_2	AhyA	2e-24	82.7	0.1	2.4e-14	49.3	0.1	4.8	4	1	0	4	4	4	3	1
		CH_93-scaffold_21512_1	AhyA	9.2e-15	50.7	0	1.6e-14	49.9	0	1.3	1	0	0	1	1	1	1	1
		CH_93-scaffold_145820_2	AhyA	1.1e-11	40.5	0.4	1.5e-09	33.5	0	2	1	1	1	2	2	2	2	1
		CH_93-scaffold_29140_6	AhyA	3.3e-08	29	0	0.00089	14.3	0	2.3	2	0	0	2	2	2	2	1
		CH_93-scaffold_145820_1	AhyA	4.7e-07	25.2	0.2	5.6e-06	21.6	0.1	1.9	1	1	1	2	2	2	1	1
		CH_93-scaffold_46420_3	AhyA	1.5e-06	23.6	0.1	0.0001	17.4	0	2.7	2	1	1	3	3	3	1	1
		CH_93-scaffold_44049_1	AhyA	0.002	13.2	0.2	0.39	5.6	0.1	2	2	0	0	2	2	2	2	0
		CH_93-scaffold_46420_2	AhyA	0.0033	12.5	0	0.0042	12.1	0	1.1	1	0	0	1	1	1	1	0
		CH_93-scaffold_24042_4	AlmA_GroupI	0.015	10.9	0	0.016	10.8	0	1	1	0	0	1	1	1	0	0
		CH_93-scaffold_42292_2	AlmA_GroupI	0.022	10.3	0	0.63	5.5	0	2.1	2	0	0	2	2	2	0	0
		CH_93-scaffold_14055_7	AlmA_GroupI	0.038	9.5	1.6	1.2	4.6	0.1	2.6	3	0	0	3	3	3	0	0
		CH_93-scaffold_49996_1	CmdA	8.4e-29	97	0	1.8e-23	79.3	0	3.7	3	1	1	4	4	4	2	1
		CH_93-scaffold_62739_1	CmdA	1.8e-16	56.2	0	7.7e-08	27.6	0	4.1	3	1	1	4	4	4	4	1
		CH_93-scaffold_66860_2	CmdA	3.4e-15	52	0	5.6e-13	44.6	0	2.7	3	0	0	3	3	3	2	1
		CH_93-scaffold_145820_2	CmdA	6.9e-11	37.7	0.2	9e-09	30.7	0.2	2	1	1	0	1	1	1	1	1
		CH_93-scaffold_21512_1	CmdA	7.4e-08	27.7	0	2.3e-06	22.7	0	2	2	0	0	2	2	2	2	1
		CH_93-scaffold_46420_3	CmdA	0.01	10.7	0	0.085	7.6	0	2.4	4	0	0	4	4	4	0	0
		CH_93-scaffold_57652_3	DszC	1.8e-20	70	0	2.2e-20	69.6	0	1	1	0	0	1	1	1	1	1
		CH_93-scaffold_49223_3	DszC	3e-18	62.7	1.1	1e-16	57.6	1.1	2	1	1	0	1	1	1	1	1
		CH_93-scaffold_98591_3	DszC	2.3e-15	53.1	0	6.9e-15	51.6	0	1.7	1	1	0	1	1	1	1	1
		CH_93-scaffold_18452_3	DszC	7.7e-15	51.4	0	5e-12	42.1	0	2.1	1	1	1	2	2	2	2	1
		CH_93-scaffold_18452_4	DszC	1.4e-09	34.1	0	1.9e-09	33.6	0	1.2	1	0	0	1	1	1	1	1
		CH_93-scaffold_13210_3	DszC	6.6e-09	31.8	0	9.8e-09	31.3	0	1.2	1	0	0	1	1	1	1	1
		CH_93-scaffold_12377_6	DszC	5.2e-08	28.9	0.2	2.4e-07	26.7	0.2	1.9	1	1	0	1	1	1	1	1
		CH_93-scaffold_42553_2	DszC	7.7e-08	28.3	0.1	1.6e-07	27.3	0.1	1.5	1	1	0	1	1	1	1	1
		CH_93-scaffold_111450_1	DszC	5.3e-07	25.6	0	8.4e-07	24.9	0	1.4	1	0	0	1	1	1	1	1
		CH_93-scaffold_75614_2	DszC	0.0046	12.6	0.1	0.0052	12.4	0.1	1.1	1	0	0	1	1	1	1	0
		CH_93-scaffold_49996_1	EbdA	1e-36	122.9	0	1.2e-21	73.1	0	4.2	2	2	2	4	4	4	4	1
		CH_93-scaffold_62739_1	EbdA	4.6e-24	81	0	1.8e-08	29.5	0	4	3	1	1	4	4	4	4	1
		CH_93-scaffold_66860_2	EbdA	7.8e-14	47.2	0	1.9e-10	35.9	0	3.2	3	1	0	3	3	3	2	1
		CH_93-scaffold_145820_2	EbdA	2.1e-13	45.7	0.2	4.8e-13	44.6	0.2	1.6	1	1	0	1	1	1	1	1
		CH_93-scaffold_21512_1	EbdA	1.2e-09	33.3	0.1	0.00023	15.8	0	2.2	2	0	0	2	2	2	2	1
		CH_93-scaffold_46420_3	EbdA	1.9e-08	29.3	0	0.00042	15	0	3.8	3	1	1	4	4	4	2	1
		CH_93-scaffold_145820_1	EbdA	3.2e-05	18.7	0.3	4.3e-05	18.3	0.1	1.4	2	0	0	2	2	2	1	1
		CH_93-scaffold_29140_6	EbdA	7.3e-05	17.5	0.1	0.0012	13.4	0	2	2	0	0	2	2	2	1	1
CH_94	Bipolaricaulota	CH_94-scaffold_63805_3	AlkB	3.6e-06	22.3	0	3.8e-06	22.3	0	1	1	0	0	1	1	1	1	1
		CH_94-scaffold_1108_15	AlkB	3.7e-05	19	0	3.8e-05	19	0	1	1	0	0	1	1	1	1	1
		CH_94-scaffold_2372_13	pBmoB	0.0021	13.3	0.5	0.0033	12.6	0.5	1.2	1	0	0	1	1	1	1	0
CH_94_sub	Planctomycetota	CH_94_sub-scaffold_11607_7	AlkB	5.9e-05	20	0	6.2e-05	19.9	0	1	1	0	0	1	1	1	1	1
		CH_94_sub-scaffold_65549_2	AlmA_GroupI	0.0069	12.9	0.1	0.0096	12.4	0.1	1.1	1	0	0	1	1	1	1	0
		CH_94_sub-scaffold_3176_4	AlmA_GroupI	0.019	11.5	0.1	0.029	10.9	0.1	1.2	1	0	0	1	1	1	0	0
		CH_94_sub-scaffold_65549_2	AlmA_GroupIII	0.015	11.9	0	0.019	11.5	0	1.1	1	0	0	1	1	1	0	0
		CH_94_sub-scaffold_3176_4	AlmA_GroupIII	0.037	10.5	0.1	0.055	10	0.1	1.2	1	0	0	1	1	1	0	0
		CH_94_sub-scaffold_7073_11	AssA	1.4e-128	428	0	1.8e-128	427.6	0	1	1	0	0	1	1	1	1	1
		CH_94_sub-scaffold_7073_11	BssA	5.3e-121	402.9	0	7.7e-121	402.3	0	1.2	1	0	0	1	1	1	1	1
		CH_94_sub-scaffold_5290_4	DszC	3.2e-06	23.9	0.1	1.2e-05	22.1	0	2	3	0	0	3	3	3	1	1
		CH_94_sub-scaffold_10149_3	MAH_alpha	0.017	11.8	0	0.022	11.4	0	1.2	1	0	0	1	1	1	0	0
		CH_94_sub-scaffold_7073_11	NmsA	4e-115	383.4	0	5.8e-115	382.9	0	1.1	1	0	0	1	1	1	1	1
		CH_94_sub-scaffold_17352_3	TmoA_BmoA	0.036	10.8	0	0.038	10.7	0	1.1	1	0	0	1	1	1	0	0
		CH_94_sub-scaffold_17352_3	TomA3	0.00013	18.5	0.1	0.00013	18.4	0.1	1.1	1	0	0	1	1	1	1	0
CH_95_sub	Desulfobacterota	CH_95_sub-scaffold_80676_2	AbcA_1	6.2e-43	145	0.1	4.4e-40	135.6	0.2	2	2	0	0	2	2	2	2	1
		CH_95_sub-scaffold_80676_2	AbcA_2	1.6e-144	479.8	0.8	6.8e-140	464.5	0.1	3	2	1	0	2	2	2	2	1
		CH_95_sub-scaffold_3921_3	AhyA	5.9e-53	178	0	7.2e-41	138	0	4	3	1	1	4	4	4	4	1
		CH_95_sub-scaffold_785_10	AhyA	3.4e-43	145.7	0	2.1e-27	93.5	0	4	3	1	1	4	4	4	4	1
		CH_95_sub-scaffold_1568_1	AhyA	2.1e-37	126.6	0	6e-24	82	0	4.3	3	1	1	4	4	4	4	1
		CH_95_sub-scaffold_1813_7	AhyA	1.3e-32	110.6	0	4e-24	82.6	0.1	3.5	3	1	0	3	3	3	2	1
		CH_95_sub-scaffold_7872_2	AhyA	1.2e-24	84.3	0	7.8e-10	35.3	0	4	3	1	1	4	4	4	4	1
		CH_95_sub-scaffold_11688_6	AhyA	4.2e-21	72.6	0.2	3.8e-08	29.7	0	4	3	1	1	4	4	4	4	1
		CH_95_sub-scaffold_4386_14	AhyA	1.6e-20	70.7	0	2.7e-06	23.6	0	4	3	1	1	4	4	4	4	1
		CH_95_sub-scaffold_1094_12	AhyA	2.7e-19	66.6	0	6.5e-06	22.3	0	4	3	1	1	4	4	4	4	1
		CH_95_sub-scaffold_11688_5	AhyA	1.1e-06	24.9	0.1	1.5e-06	24.4	0.1	1.1	1	0	0	1	1	1	1	1
		CH_95_sub-scaffold_1094_11	AhyA	0.0067	12.3	0	0.0087	12	0	1.1	1	0	0	1	1	1	1	0
		CH_95_sub-scaffold_4386_13	AhyA	0.0089	11.9	0	0.012	11.6	0	1.1	1	0	0	1	1	1	1	0
		CH_95_sub-scaffold_5609_6	AlkB	1e-05	22.4	0	1.1e-05	22.3	0	1	1	0	0	1	1	1	1	1
		CH_95_sub-scaffold_9216_6	AlkB	2.1e-05	21.4	0	2.1e-05	21.4	0	1	1	0	0	1	1	1	1	1
		CH_95_sub-scaffold_5609_7	AlkB	0.00095	16	0	0.00096	15.9	0	1	1	0	0	1	1	1	1	0
		CH_95_sub-scaffold_2977_25	AlkB	0.1	9.2	1.7	0.16	8.6	1.7	1.2	1	0	0	1	1	1	0	0
		CH_95_sub-scaffold_2138_15	AlkB	0.62	6.7	4.2	0.12	9.1	0.1	1.7	2	0	0	2	2	2	0	0
		CH_95_sub-scaffold_8216_2	AlmA_GroupI	0.012	12.1	0.1	0.017	11.6	0.1	1.2	1	0	0	1	1	1	0	0
		CH_95_sub-scaffold_594_4	AlmA_GroupI	0.021	11.3	0.1	0.92	5.8	0	2.2	2	0	0	2	2	2	0	0
		CH_95_sub-scaffold_519_27	AlmA_GroupI	0.05	10	0.1	1.6	5	0	2.2	2	0	0	2	2	2	0	0
		CH_95_sub-scaffold_8216_2	AlmA_GroupIII	0.0069	12.9	0	0.019	11.5	0	1.6	2	0	0	2	2	2	1	0
		CH_95_sub-scaffold_594_4	AlmA_GroupIII	0.032	10.7	0.1	0.77	6.2	0	2.1	2	0	0	2	2	2	0	0
		CH_95_sub-scaffold_1758_8	AssA	0	1206.4	2.6	0	1206.2	2.6	1	1	0	0	1	1	1	1	1
		CH_95_sub-scaffold_1758_9	AssA	0	1204.1	2.5	0	1204	2.5	1	1	0	0	1	1	1	1	1
		CH_95_sub-scaffold_1758_10	AssA	0	1191.9	4.1	0	1191.7	4.1	1	1	0	0	1	1	1	1	1
		CH_95_sub-scaffold_6325_17	AssA	0.013	11.2	0.1	0.015	11	0.1	1	1	0	0	1	1	1	0	0
		CH_95_sub-scaffold_1758_8	BssA	1.6e-169	563.4	0.1	1.9e-169	563.1	0.1	1	1	0	0	1	1	1	1	1
		CH_95_sub-scaffold_1758_9	BssA	4.2e-166	552	0.1	5.2e-166	551.7	0.1	1	1	0	0	1	1	1	1	1
		CH_95_sub-scaffold_1758_10	BssA	7.8e-165	547.8	0.3	9.6e-165	547.5	0.3	1	1	0	0	1	1	1	1	1
		CH_95_sub-scaffold_3921_3	CmdA	4e-37	125.4	0.1	9e-23	77.9	0	3.7	3	1	0	3	3	3	3	1
		CH_95_sub-scaffold_785_10	CmdA	2.7e-28	96.2	0	2.9e-20	69.6	0	4	3	1	1	4	4	4	4	1
		CH_95_sub-scaffold_1568_1	CmdA	1.5e-22	77.2	0	5.2e-14	48.9	0	3.9	3	1	1	4	4	4	3	1
		CH_95_sub-scaffold_1813_7	CmdA	6.8e-20	68.4	0	1e-17	61.2	0	2.5	3	0	0	3	3	3	2	1
		CH_95_sub-scaffold_7872_2	CmdA	3.7e-13	46.1	0	3.8e-05	19.6	0	3.1	3	0	0	3	3	3	3	1
		CH_95_sub-scaffold_11688_6	CmdA	5.2e-11	39	0.6	0.00026	16.8	0.1	3.9	3	1	1	4	4	4	3	1
		CH_95_sub-scaffold_4386_14	CmdA	4.3e-08	29.3	0	0.00016	17.6	0	2.9	2	1	1	3	3	3	2	1
		CH_95_sub-scaffold_1094_12	CmdA	5.8e-07	25.6	0	0.00068	15.4	0	2.8	2	1	1	3	3	3	2	1
		CH_95_sub-scaffold_3726_19	CmdA	0.038	9.7	0.1	0.049	9.3	0.1	1.1	1	0	0	1	1	1	0	0
		CH_95_sub-scaffold_2790_11	DszC	1.8e-21	74.1	0.1	4.3e-19	66.3	0.1	2	1	1	0	1	1	1	1	1
		CH_95_sub-scaffold_2790_8	DszC	3.3e-19	66.7	0	3.3e-17	60.1	0	2.1	1	1	0	1	1	1	1	1
		CH_95_sub-scaffold_6014_6	DszC	1.2e-15	54.9	0.1	1.2e-13	48.4	0.1	2.1	1	1	0	1	1	1	1	1
		CH_95_sub-scaffold_824_32	DszC	2.2e-13	47.5	0.1	4e-12	43.3	0.1	2	1	1	0	1	1	1	1	1
		CH_95_sub-scaffold_3921_16	DszC	3e-10	37.2	0.1	4.1e-10	36.7	0.1	1.1	1	0	0	1	1	1	1	1
		CH_95_sub-scaffold_4386_7	DszC	3.5e-08	30.4	0	1.5e-07	28.3	0	1.9	2	0	0	2	2	2	1	1
		CH_95_sub-scaffold_9781_7	DszC	4.7e-07	26.6	0	1.7e-06	24.8	0	1.7	2	0	0	2	2	2	1	1
		CH_95_sub-scaffold_11944_1	DszC	6e-07	26.3	0.2	1.9e-05	21.4	0.2	2.2	1	1	0	1	1	1	1	1
		CH_95_sub-scaffold_1094_5	DszC	3.1e-06	23.9	0.2	1.2e-05	22	0.2	1.9	1	1	0	1	1	1	1	1
		CH_95_sub-scaffold_2328_10	DszC	5.6e-06	23.1	0	7e-06	22.8	0	1.2	1	0	0	1	1	1	1	1
		CH_95_sub-scaffold_6014_5	DszC	0.00011	18.8	0	0.00023	17.8	0	1.4	1	0	0	1	1	1	1	0
		CH_95_sub-scaffold_2328_11	DszC	0.00016	18.3	0	0.0037	13.8	0	2.6	2	1	0	3	3	3	1	0
		CH_95_sub-scaffold_17890_2	DszC	0.00017	18.2	0	0.00034	17.2	0	1.4	1	0	0	1	1	1	1	0
		CH_95_sub-scaffold_3921_15	DszC	0.00041	17	0	0.00055	16.5	0	1.2	1	0	0	1	1	1	1	0
		CH_95_sub-scaffold_785_10	EbdA	5.4e-40	134.7	0	7e-24	81.3	0	4	3	1	1	4	4	4	4	1
		CH_95_sub-scaffold_3921_3	EbdA	2.1e-33	112.9	0	6.2e-28	94.7	0	4.1	3	1	1	4	4	4	3	1
		CH_95_sub-scaffold_1568_1	EbdA	2.2e-30	102.9	0	1.3e-17	60.5	0	4.6	3	1	1	4	4	4	4	1
		CH_95_sub-scaffold_1813_7	EbdA	1e-27	94	0.1	3.1e-21	72.5	0.1	3	3	1	0	3	3	3	2	1
		CH_95_sub-scaffold_4386_14	EbdA	1.3e-21	73.8	0	9e-09	31.3	0	3	2	1	1	3	3	3	3	1
		CH_95_sub-scaffold_7872_2	EbdA	3.8e-21	72.3	0	4.5e-08	29	0	4	3	1	1	4	4	4	4	1
		CH_95_sub-scaffold_1094_12	EbdA	1.1e-20	70.8	0	5.2e-08	28.8	0	3	2	1	1	3	3	3	3	1
		CH_95_sub-scaffold_11688_6	EbdA	2e-19	66.6	0.2	2.1e-12	43.3	0	3.7	3	1	1	4	4	4	3	1
		CH_95_sub-scaffold_11688_5	EbdA	2.9e-05	19.7	0	3.9e-05	19.3	0	1.1	1	0	0	1	1	1	1	1
		CH_95_sub-scaffold_80676_2	K27540	6.1e-55	184.7	0.2	1.3e-52	177.1	0.3	2.9	2	1	0	2	2	2	2	1
		CH_95_sub-scaffold_17655_1	LadA_alpha	0.00073	16	0	0.0026	14.2	0	1.7	1	1	1	2	2	2	1	0
		CH_95_sub-scaffold_1758_8	NmsA	9.6e-165	547.5	0.2	1.1e-164	547.2	0.2	1	1	0	0	1	1	1	1	1
		CH_95_sub-scaffold_1758_10	NmsA	1.8e-161	536.7	0.9	2.2e-161	536.4	0.9	1	1	0	0	1	1	1	1	1
		CH_95_sub-scaffold_1758_9	NmsA	1.5e-159	530.3	0.4	1.8e-159	530	0.4	1	1	0	0	1	1	1	1	1
		CH_95_sub-scaffold_80630_3	NmsA	3.9e-05	19.5	1	6.4e-05	18.8	1	1.3	1	0	0	1	1	1	1	1
CH_100	Firmicutes	CH_100-scaffold_12460_6	AbcA_2	0.0049	12.4	0.1	0.008	11.7	0.1	1.2	1	0	0	1	1	1	1	0
		CH_100-scaffold_24693_2	AhyA	5e-61	204	1.3	1.9e-28	96.1	0.2	4	2	1	2	4	4	4	4	1
		CH_100-scaffold_18396_2	AhyA	7.3e-34	114.1	0.9	1e-14	50.7	0	3.9	3	1	1	4	4	4	4	1
		CH_100-scaffold_10771_10	AlkB	0.0027	13.7	0	0.0027	13.7	0	1	1	0	0	1	1	1	1	0
		CH_100-scaffold_21768_3	AlmA_GroupI	0.0089	11.7	0.6	0.88	5.2	0.1	2.2	2	0	0	2	2	2	2	0
		CH_100-scaffold_6687_9	AlmA_GroupIII	0.0015	14.3	0.1	0.0021	13.9	0.1	1.1	1	0	0	1	1	1	1	0
		CH_100-scaffold_16281_8	AlmA_GroupIII	0.0034	13.2	0.3	0.0046	12.7	0.3	1.1	1	0	0	1	1	1	1	0
		CH_100-scaffold_29514_2	AssA	8.3e-25	83.9	0.1	4.2e-17	58.4	0	2.8	2	1	0	2	2	2	2	1
		CH_100-scaffold_51595_7	AssA	0.023	9.7	0.1	0.032	9.2	0.1	1.1	1	0	0	1	1	1	0	0
		CH_100-scaffold_29514_2	BssA	1.5e-21	73	0.2	9.5e-19	63.8	0	2.5	2	0	0	2	2	2	2	1
		CH_100-scaffold_24693_2	CmdA	8.8e-35	116.9	0.1	2.5e-17	59.2	0.1	4	3	1	1	4	4	4	4	1
		CH_100-scaffold_18396_2	CmdA	3e-20	68.8	0	3.6e-10	35.5	0	4	3	1	1	4	4	4	4	1
		CH_100-scaffold_24693_2	EbdA	1.3e-48	162.5	1.7	1.4e-19	66.3	0.1	4	2	1	2	4	4	4	4	1
		CH_100-scaffold_18396_2	EbdA	4.4e-37	124.3	1.2	2.2e-21	72.3	0	4	2	1	2	4	4	4	4	1
		CH_100-scaffold_29514_2	NmsA	5.4e-20	67.9	0.1	4.3e-19	65	0	2.3	3	0	0	3	3	3	1	1
CH_101_sub	Desulfobacterota	CH_101_sub-scaffold_844_4	AbcA_1	1.9e-16	57.2	0	2.6e-16	56.7	0	1.1	1	0	0	1	1	1	1	1
		CH_101_sub-scaffold_844_4	AbcA_2	4.4e-69	230.6	0	2.2e-68	228.3	0	1.8	2	0	0	2	2	2	1	1
		CH_101_sub-scaffold_4985_3	AhyA	1.7e-43	146.3	0.9	6.1e-25	84.9	0	3	2	1	1	3	3	3	3	1
		CH_101_sub-scaffold_372_40	AhyA	6.9e-21	71.5	0.5	7.3e-08	28.4	0	4	3	1	1	4	4	4	4	1
		CH_101_sub-scaffold_5136_9	AhyA	4.6e-20	68.8	0.8	6.4e-19	65	0.4	2.4	2	1	0	2	2	2	1	1
		CH_101_sub-scaffold_3574_18	AhyA	6.3e-20	68.3	0.3	7.9e-08	28.3	0	3.9	3	1	1	4	4	4	3	1
		CH_101_sub-scaffold_5240_3	AhyA	2.8e-19	66.1	0.2	1.3e-12	44.1	0	4.4	2	2	2	4	4	4	3	1
		CH_101_sub-scaffold_328_36	AhyA	3.8e-18	62.4	0	6e-17	58.4	0	2.3	1	1	1	2	2	2	1	1
		CH_101_sub-scaffold_844_18	AhyA	2e-17	60	0.2	3.2e-06	23	0	4	3	1	1	4	4	4	4	1
		CH_101_sub-scaffold_271_11	AhyA	8.8e-10	34.7	1.3	3.2e-07	26.3	0.9	3.5	3	1	0	3	3	3	1	1
		CH_101_sub-scaffold_271_12	AhyA	2.3e-08	30.1	0.2	1.1e-06	24.5	0.2	2	1	1	0	1	1	1	1	1
		CH_101_sub-scaffold_844_19	AhyA	0.00025	16.7	0	0.00032	16.3	0	1.1	1	0	0	1	1	1	1	0
		CH_101_sub-scaffold_372_39	AhyA	0.00084	14.9	0	0.00084	14.9	0	1	1	0	0	1	1	1	1	0
		CH_101_sub-scaffold_3574_19	AhyA	0.0071	11.9	0	0.0093	11.5	0	1.1	1	0	0	1	1	1	1	0
		CH_101_sub-scaffold_849_5	AlkB	0.00038	16.9	0	0.00038	16.9	0	1	1	0	0	1	1	1	1	0
		CH_101_sub-scaffold_10744_2	AlkB	2.9	4.1	7	0.3	7.3	0.4	2.2	2	0	0	2	2	2	0	0
		CH_101_sub-scaffold_1069_18	AlmA_GroupI	9.6e-05	18.6	0	0.0097	12	0	2.1	2	0	0	2	2	2	2	1
		CH_101_sub-scaffold_5240_11	AlmA_GroupI	0.00015	17.9	0	0.00021	17.5	0	1.1	1	0	0	1	1	1	1	0
		CH_101_sub-scaffold_148_30	AlmA_GroupI	0.011	11.8	0	0.16	7.9	0	2.1	2	0	0	2	2	2	0	0
		CH_101_sub-scaffold_19141_6	AlmA_GroupI	0.024	10.7	0	1.1	5.2	0	2.2	2	0	0	2	2	2	0	0
		CH_101_sub-scaffold_5240_11	AlmA_GroupIII	0.00023	17.4	0	0.00034	16.9	0	1.2	1	0	0	1	1	1	1	0
		CH_101_sub-scaffold_3376_14	AlmA_GroupIII	0.00037	16.7	1.4	0.023	10.8	0	3.6	4	1	1	5	5	5	1	0
		CH_101_sub-scaffold_8857_3	AlmA_GroupIII	0.023	10.8	0.1	0.3	7.1	0	2.1	2	0	0	2	2	2	0	0
		CH_101_sub-scaffold_2466_18	AssA	2.3e-128	426.9	0	3e-128	426.5	0	1	1	0	0	1	1	1	1	1
		CH_101_sub-scaffold_2466_18	BssA	6.2e-111	369.1	0	1.6e-110	367.7	0	1.5	1	1	0	1	1	1	1	1
		CH_101_sub-scaffold_4985_3	CmdA	5.5e-27	91.5	0.2	2.1e-18	63	0	3.1	2	1	1	3	3	3	3	1
		CH_101_sub-scaffold_5136_9	CmdA	1.7e-15	53.4	0	2.6e-15	52.9	0	1.1	1	0	0	1	1	1	1	1
		CH_101_sub-scaffold_328_36	CmdA	9.2e-13	44.4	0	6.5e-10	35	0	2.3	2	0	0	2	2	2	2	1
		CH_101_sub-scaffold_271_11	CmdA	1.2e-10	37.4	0.9	4.4e-05	19	0.1	3.2	3	0	0	3	3	3	3	1
		CH_101_sub-scaffold_5240_3	CmdA	3.3e-10	36	0	3.4e-09	32.6	0	2.4	3	0	0	3	3	3	1	1
		CH_101_sub-scaffold_844_18	CmdA	3.6e-10	35.8	0	0.0051	12.1	0	3.3	3	1	0	3	3	3	3	1
		CH_101_sub-scaffold_3574_18	CmdA	6.1e-08	28.5	0.2	0.035	9.4	0	4.1	3	2	2	5	5	5	3	1
		CH_101_sub-scaffold_271_12	CmdA	0.0036	12.6	0.2	0.023	10	0	1.9	1	1	0	2	2	2	1	0
		CH_101_sub-scaffold_372_40	CmdA	0.004	12.5	0.2	0.092	8	0	2.8	3	1	1	4	4	4	1	0
		CH_101_sub-scaffold_844_15	DszC	1.5e-21	74	0.5	8e-20	68.3	0.5	2	1	1	0	1	1	1	1	1
		CH_101_sub-scaffold_69982_1	DszC	3.6e-20	69.4	0.5	1e-18	64.6	0.5	2	1	1	0	1	1	1	1	1
		CH_101_sub-scaffold_3550_10	DszC	2.3e-15	53.6	0.8	2.6e-13	46.9	0.8	2	1	1	0	1	1	1	1	1
		CH_101_sub-scaffold_692_17	DszC	9.7e-07	25.2	0.1	1.7e-05	21.1	0	2.1	2	0	0	2	2	2	1	1
		CH_101_sub-scaffold_215_35	DszC	5.2e-05	19.5	0.1	0.0001	18.5	0.1	1.5	1	1	0	1	1	1	1	1
		CH_101_sub-scaffold_2466_15	DszC	0.0016	14.6	0	0.0049	13	0	1.6	2	0	0	2	2	2	1	0
		CH_101_sub-scaffold_4985_3	EbdA	1.5e-32	109.6	0.4	3e-16	55.7	0	3	2	1	1	3	3	3	3	1
		CH_101_sub-scaffold_3574_18	EbdA	4.8e-18	61.6	0	6.4e-07	24.8	0	3.3	2	1	1	4	4	4	3	1
		CH_101_sub-scaffold_372_40	EbdA	8.6e-17	57.5	0.1	4.2e-05	18.8	0	4	3	1	1	4	4	4	4	1
		CH_101_sub-scaffold_5136_9	EbdA	8.1e-15	50.9	0.1	2.6e-08	29.4	0	3.1	4	0	0	4	4	4	2	1
		CH_101_sub-scaffold_844_18	EbdA	6.7e-14	47.9	0	7.3e-06	21.3	0	3.7	3	1	1	4	4	4	3	1
		CH_101_sub-scaffold_328_36	EbdA	1.3e-13	46.9	0	3.2e-08	29.1	0	2.5	3	0	0	3	3	3	2	1
		CH_101_sub-scaffold_271_11	EbdA	1.8e-12	43.2	0.1	3e-11	39.1	0.2	2.3	2	1	0	2	2	2	1	1
		CH_101_sub-scaffold_5240_3	EbdA	1.8e-11	39.9	0.7	8.8e-07	24.3	0	3.5	1	1	1	2	2	2	2	1
		CH_101_sub-scaffold_271_12	EbdA	3.4e-06	22.4	0.1	4.6e-05	18.6	0	2	2	0	0	2	2	2	1	1
		CH_101_sub-scaffold_844_19	EbdA	0.015	10.3	0	0.02	9.9	0	1.1	1	0	0	1	1	1	0	0
		CH_101_sub-scaffold_3574_19	EbdA	0.03	9.3	0	0.041	8.9	0	1.1	1	0	0	1	1	1	0	0
		CH_101_sub-scaffold_844_4	K27540	4.8e-23	79.2	0	8.2e-23	78.4	0	1.3	1	1	0	1	1	1	1	1
		CH_101_sub-scaffold_2466_18	NmsA	1.5e-106	354.6	0	2.9e-106	353.7	0	1.3	1	1	0	1	1	1	1	1
		CH_101_sub-scaffold_1991_3	TomA3	0.0095	11.9	0	0.012	11.5	0	1.1	1	0	0	1	1	1	1	0
CH_103	Eisenbacteria	CH_103-scaffold_28183_3	AlmA_GroupI	0.0036	12.6	1.9	0.23	6.7	0	2.9	2	1	1	3	3	3	3	0
		CH_103-scaffold_140821_3	DszC	5.3e-10	35.2	0	1.1e-09	34.1	0	1.5	1	1	0	1	1	1	1	1
		CH_103-scaffold_44152_4	TmoA_BmoA	0.017	10.6	0	0.018	10.5	0	1.1	1	0	0	1	1	1	0	0
		CH_103-scaffold_44152_4	TomA3	0.00024	16.4	0.1	0.00028	16.2	0.1	1.1	1	0	0	1	1	1	1	0
CH_115	Patescibacteria	No Matches	N/A															0
CH_122	Patescibacteria	CH_122-scaffold_2687_14	AlmA_GroupI	0.00021	15	0.4	0.00077	13.1	0.1	2	2	1	0	2	2	2	1	0
CH_123	Acidobacteriota	CH_123-scaffold_382_15	AhyA	6.3e-10	34.8	0.2	7e-06	21.4	0	2.2	2	0	0	2	2	2	2	1
		CH_123-scaffold_15716_1	AhyA	0.015	10.4	0	0.02	10	0	1.1	1	0	0	1	1	1	0	0
		CH_123-scaffold_234_15	AlkB	3.6e-06	23.1	0	3.6e-06	23.1	0	1	1	0	0	1	1	1	1	1
		CH_123-scaffold_169_40	AlkB	9.9e-06	21.7	0	1.2e-05	21.4	0	1.2	1	0	0	1	1	1	1	1
		CH_123-scaffold_660_33	AlmA_GroupI	0.023	10.4	0	0.04	9.5	0	1.3	1	0	0	1	1	1	0	0
		CH_123-scaffold_949_9	AlmA_GroupI	0.024	10.3	0	0.036	9.7	0	1.2	1	0	0	1	1	1	0	0
		CH_123-scaffold_59_37	AlmA_GroupIII	0.014	11.1	0	0.3	6.7	0	2.4	3	0	0	3	3	3	0	0
		CH_123-scaffold_949_9	AlmA_GroupIII	0.032	9.9	0.1	0.051	9.2	0.1	1.2	1	0	0	1	1	1	0	0
		CH_123-scaffold_95_5	AssA	1e-138	460.7	0	1.3e-138	460.3	0	1	1	0	0	1	1	1	1	1
		CH_123-scaffold_95_5	BssA	1.8e-120	400.3	0	2.3e-120	399.9	0	1.1	1	0	0	1	1	1	1	1
		CH_123-scaffold_430_17	CYP153	0.0009	15.2	0.4	0.0039	13	0.1	1.9	2	0	0	2	2	2	1	0
		CH_123-scaffold_114_27	DszC	3.1e-19	66	0.1	2.7e-18	62.8	0	2	1	1	0	2	2	2	1	1
		CH_123-scaffold_4550_2	DszC	1e-15	54.4	0	1.9e-15	53.5	0	1.5	1	1	0	1	1	1	1	1
		CH_123-scaffold_31_113	DszC	4.2e-12	42.5	0	1.2e-10	37.7	0	2	1	1	0	2	2	2	2	1
		CH_123-scaffold_382_15	EbdA	0.00036	15.3	0.4	0.03	8.9	0	2.2	2	0	0	2	2	2	2	0
		CH_123-scaffold_501_34	K27540	0.019	10.8	0.1	0.027	10.3	0.1	1.1	1	0	0	1	1	1	0	0
		CH_123-scaffold_95_22	LadB	0.022	10.6	0.4	0.036	9.9	0.1	1.5	2	0	0	2	2	2	0	0
		CH_123-scaffold_579_15	MAH_alpha	0.00065	15.6	0	0.00081	15.2	0	1	1	0	0	1	1	1	1	0
		CH_123-scaffold_579_15	NdoB	2.2e-05	20.5	0	2.8e-05	20.2	0	1	1	0	0	1	1	1	1	1
		CH_123-scaffold_95_5	NmsA	9.4e-112	371.4	0	1.2e-111	371.1	0	1	1	0	0	1	1	1	1	1
		CH_123-scaffold_579_15	non_NdoB_type	3.1e-05	20.3	0	3.9e-05	20	0	1.1	1	0	0	1	1	1	1	1
CH_123_sub	Desulfobacterota	CH_123_sub-scaffold_13195_4	AhyA	2.8e-23	78.8	0.3	4.6e-09	31.8	0	4	3	1	1	4	4	4	4	1
		CH_123_sub-scaffold_11659_5	AhyA	5.8e-23	77.8	0	4.4e-08	28.6	0	4	3	1	1	4	4	4	4	1
		CH_123_sub-scaffold_44061_2	AhyA	1.9e-12	43	0	2.5e-05	19.4	0	3.2	3	0	0	3	3	3	3	1
		CH_123_sub-scaffold_11659_6	AhyA	1.8e-05	19.9	0	2.3e-05	19.6	0	1.1	1	0	0	1	1	1	1	1
		CH_123_sub-scaffold_44061_1	AhyA	0.0003	15.9	0.5	0.0011	14	0.5	1.8	1	1	0	1	1	1	1	0
		CH_123_sub-scaffold_13195_5	AhyA	0.0076	11.2	0	0.0085	11.1	0	1	1	0	0	1	1	1	1	0
		CH_123_sub-scaffold_37051_6	AlmA_GroupI	2.8e-06	23.1	0.2	6.8e-05	18.5	0	2.1	1	1	1	2	2	2	2	1
		CH_123_sub-scaffold_25971_2	AlmA_GroupI	0.0051	12.4	0.5	0.35	6.3	0	2.6	3	0	0	3	3	3	2	0
		CH_123_sub-scaffold_67179_3	AlmA_GroupI	0.0086	11.6	0.1	0.018	10.5	0	1.5	2	0	0	2	2	2	1	0
		CH_123_sub-scaffold_40365_1	AlmA_GroupIII	0.00087	15	0	0.0013	14.4	0	1.2	1	0	0	1	1	1	1	0
		CH_123_sub-scaffold_15998_4	AlmA_GroupIII	0.034	9.7	0.5	0.47	5.9	0	2.1	2	0	0	2	2	2	0	0
		CH_123_sub-scaffold_4764_8	AssA	2.5e-91	303.8	0	3e-91	303.5	0	1.1	1	0	0	1	1	1	1	1
		CH_123_sub-scaffold_47805_2	AssA	1.7e-73	244.8	0.1	2.7e-73	244.1	0.1	1.2	1	0	0	1	1	1	1	1
		CH_123_sub-scaffold_20671_4	AssA	1.6e-45	152.3	0	9.1e-39	129.9	0	2	2	0	0	2	2	2	2	1
		CH_123_sub-scaffold_20671_5	AssA	1.9e-34	115.7	0	2e-34	115.6	0	1	1	0	0	1	1	1	1	1
		CH_123_sub-scaffold_4764_8	BssA	9.6e-83	275.3	0	1.5e-82	274.7	0	1.3	1	1	0	1	1	1	1	1
		CH_123_sub-scaffold_47805_2	BssA	5.4e-72	239.8	0.1	1e-71	238.8	0.1	1.3	1	1	0	1	1	1	1	1
		CH_123_sub-scaffold_20671_4	BssA	2.5e-35	118.5	0	1.5e-28	96	0	2	1	1	1	2	2	2	2	1
		CH_123_sub-scaffold_20671_5	BssA	3.4e-27	91.5	0	3.7e-27	91.4	0	1	1	0	0	1	1	1	1	1
		CH_123_sub-scaffold_11659_5	CmdA	3.2e-13	45.4	0.3	0.0035	12.2	0	4	3	1	1	4	4	4	4	1
		CH_123_sub-scaffold_13195_4	CmdA	5.5e-11	38	0	3.5e-06	22.1	0	3.3	2	1	2	4	4	4	3	1
		CH_123_sub-scaffold_44061_2	CmdA	8.4e-06	20.8	0	0.00064	14.6	0	2.1	2	0	0	2	2	2	2	1
		CH_123_sub-scaffold_4813_11	DszC	1.7e-15	53.5	0	2.7e-14	49.6	0.1	2	1	1	0	1	1	1	1	1
		CH_123_sub-scaffold_11721_6	DszC	3.6e-15	52.4	0.4	5.5e-15	51.8	0.4	1.4	1	1	0	1	1	1	1	1
		CH_123_sub-scaffold_40823_1	DszC	4.2e-12	42.4	0	1.1e-10	37.7	0	2	1	1	0	1	1	1	1	1
		CH_123_sub-scaffold_41282_3	DszC	4.8e-12	42.2	0	8e-12	41.4	0	1.3	1	0	0	1	1	1	1	1
		CH_123_sub-scaffold_90279_6	DszC	2e-10	36.8	0	2.8e-10	36.3	0	1.1	1	0	0	1	1	1	1	1
		CH_123_sub-scaffold_44285_10	DszC	1.4e-09	34	0.2	1.8e-09	33.7	0.2	1.1	1	0	0	1	1	1	1	1
		CH_123_sub-scaffold_21877_9	DszC	5.8e-09	32	0.1	7.5e-09	31.6	0.1	1.2	1	0	0	1	1	1	1	1
		CH_123_sub-scaffold_44285_9	DszC	3.1e-07	26.3	0.1	6e-07	25.4	0	1.4	2	0	0	2	2	2	1	1
		CH_123_sub-scaffold_17846_5	DszC	5.3e-07	25.5	0	8.4e-07	24.9	0	1.2	1	0	0	1	1	1	1	1
		CH_123_sub-scaffold_28174_4	DszC	1.3e-06	24.2	0	0.081	8.5	0	3	3	0	0	3	3	3	3	1
		CH_123_sub-scaffold_17846_6	DszC	1.5e-05	20.8	0	0.033	9.8	0	2.1	2	0	0	2	2	2	2	1
		CH_123_sub-scaffold_27321_2	DszC	0.00016	17.3	0	0.0016	14.1	0	2.2	2	1	0	2	2	2	1	0
		CH_123_sub-scaffold_28174_3	DszC	0.0002	17.1	1.3	0.0014	14.3	0.2	2.2	2	1	0	2	2	2	1	0
		CH_123_sub-scaffold_17287_2	DszC	0.00024	16.8	0	0.00065	15.4	0	1.6	1	1	0	1	1	1	1	0
		CH_123_sub-scaffold_29810_3	DszC	0.00035	16.2	0	0.058	8.9	0	2.4	3	0	0	3	3	3	2	0
		CH_123_sub-scaffold_17846_4	DszC	0.00054	15.6	0	0.24	6.9	0	2.4	2	1	0	2	2	2	2	0
		CH_123_sub-scaffold_46008_1	DszC	0.0026	13.4	0	0.0054	12.3	0	1.4	1	0	0	1	1	1	1	0
		CH_123_sub-scaffold_34856_3	DszC	0.0083	11.7	0	0.37	6.3	0	2.5	1	1	1	2	2	2	1	0
		CH_123_sub-scaffold_13195_4	EbdA	1.1e-25	86.3	0.2	2.5e-08	28.9	0	4	2	1	2	4	4	4	4	1
		CH_123_sub-scaffold_11659_5	EbdA	5.2e-23	77.5	0.1	2e-07	26	0	4	2	1	1	4	4	4	4	1
		CH_123_sub-scaffold_44061_2	EbdA	1.6e-09	32.9	0	2e-06	22.6	0	3.1	3	0	0	3	3	3	3	1
		CH_123_sub-scaffold_44061_1	EbdA	0.0028	12.2	0.1	0.0075	10.8	0.1	1.6	2	0	0	2	2	2	1	0
		CH_123_sub-scaffold_4764_8	NmsA	8.5e-70	232.5	0	1.5e-69	231.7	0	1.4	1	1	0	1	1	1	1	1
		CH_123_sub-scaffold_47805_2	NmsA	3.2e-58	194.2	0.1	1.2e-57	192.3	0.1	1.7	1	1	0	1	1	1	1	1
		CH_123_sub-scaffold_20671_4	NmsA	8.1e-36	120.1	0	5.1e-29	97.6	0	2	1	1	1	2	2	2	2	1
		CH_123_sub-scaffold_20671_5	NmsA	2.6e-28	95.3	0	2.8e-28	95.2	0	1	1	0	0	1	1	1	1	1
CH_130	Omnitrophota	CH_130-scaffold_2654_1	AlmA_GroupI	0.00028	16.1	0	0.0097	11	0	2	2	0	0	2	2	2	2	0
		CH_130-scaffold_21641_4	DszC	1.3e-14	50.2	0	1.8e-14	49.7	0	1.1	1	0	0	1	1	1	1	1
CH_134	Nanoarchaeota	CH_134-scaffold_2177_11	AlkB	9.2	1.2	9.5	13	0.6	9.5	1.3	1	0	0	1	1	1	0	0
		CH_134-scaffold_33015_5	AlmA_GroupI	0.00091	14.1	0.2	0.0062	11.4	0.1	2.1	1	1	1	2	2	2	2	0
		CH_134-scaffold_33015_5	AlmA_GroupIII	0.00032	15.7	0.1	0.00046	15.2	0.1	1.3	1	0	0	1	1	1	1	0
		CH_134-scaffold_41509_2	MAH_beta	0.0017	14.3	0.8	0.0028	13.6	0.8	1.3	1	0	0	1	1	1	1	0
CH_135	Chloroflexota	No Matches	N/A															0
CH_137_sub	Desulfobacterota	CH_137_sub-scaffold_4806_18	AbcA_1	1.1e-69	233.1	0	1.3e-69	232.8	0	1	1	0	0	1	1	1	1	1
		CH_137_sub-scaffold_21801_6	AbcA_1	1e-22	78.1	0	1.1e-22	78	0	1	1	0	0	1	1	1	1	1
		CH_137_sub-scaffold_1718_6	AbcA_1	1.7e-11	41.1	0	2.9e-11	40.3	0	1.4	1	1	0	1	1	1	1	1
		CH_137_sub-scaffold_1718_6	AbcA_2	2.5e-62	208.6	0	7.5e-62	207	0	1.7	2	0	0	2	2	2	1	1
		CH_137_sub-scaffold_4806_18	AbcA_2	1.3e-41	140.3	0	2e-39	133	0	2	1	1	0	1	1	1	1	1
		CH_137_sub-scaffold_21801_6	AbcA_2	1.9e-10	37.4	0	2.2e-10	37.3	0	1	1	0	0	1	1	1	1	1
		CH_137_sub-scaffold_83295_1	AhyA	1.5e-29	100.5	0	8.2e-28	94.7	0	2.1	1	1	1	2	2	2	2	1
		CH_137_sub-scaffold_2264_17	AhyA	7.7e-27	91.4	0.4	1.3e-07	27.8	0	4	3	1	1	4	4	4	4	1
		CH_137_sub-scaffold_9119_3	AhyA	7.6e-24	81.5	0	5.2e-12	42.3	0	4	3	1	1	4	4	4	3	1
		CH_137_sub-scaffold_5360_13	AhyA	1.1e-19	67.7	1.4	1.3e-18	64.2	0.4	2.5	2	1	0	2	2	2	1	1
		CH_137_sub-scaffold_1750_1	AhyA	1.5e-15	54.1	0	1.1e-14	51.2	0	1.9	1	1	0	1	1	1	1	1
		CH_137_sub-scaffold_10810_7	AhyA	2.2e-10	37	0.5	5.6e-07	25.7	0	3.4	4	0	0	4	4	4	2	1
		CH_137_sub-scaffold_2264_16	AhyA	0.0011	14.8	0	0.0011	14.8	0	1	1	0	0	1	1	1	1	0
		CH_137_sub-scaffold_25777_6	AhyA	0.045	9.5	0	0.084	8.6	0	1.5	1	0	0	1	1	1	0	0
		CH_137_sub-scaffold_3828_14	AlkB	0.00035	17.2	0	0.00035	17.2	0	1	1	0	0	1	1	1	1	0
		CH_137_sub-scaffold_7044_5	AlkB	6.6	3.1	7.3	0.34	7.4	0.4	2	2	0	0	2	2	2	0	0
		CH_137_sub-scaffold_7780_4	AlmA_GroupI	1.7e-06	24.6	0.1	2.4e-06	24.1	0.1	1.1	1	0	0	1	1	1	1	1
		CH_137_sub-scaffold_2264_7	AlmA_GroupI	0.036	10.3	0	0.039	10.2	0	1	1	0	0	1	1	1	0	0
		CH_137_sub-scaffold_7780_4	AlmA_GroupIII	0.0017	14.8	0	0.0024	14.2	0	1.1	1	0	0	1	1	1	1	0
		CH_137_sub-scaffold_2426_53	AssA	1.5e-206	685.7	0.8	1.8e-206	685.5	0.8	1	1	0	0	1	1	1	1	1
		CH_137_sub-scaffold_2757_13	AssA	3.9e-195	648	1.2	4.8e-195	647.7	1.2	1	1	0	0	1	1	1	1	1
		CH_137_sub-scaffold_2426_58	AssA	9e-194	643.5	0.1	1.1e-193	643.2	0.1	1	1	0	0	1	1	1	1	1
		CH_137_sub-scaffold_2426_58	BssA	0	1711.1	0.1	0	1710.9	0.1	1	1	0	0	1	1	1	1	1
		CH_137_sub-scaffold_2426_53	BssA	0	1319.5	1.2	0	1319.3	1.2	1	1	0	0	1	1	1	1	1
		CH_137_sub-scaffold_2757_13	BssA	3.4e-303	1005.4	0.2	4.1e-303	1005.2	0.2	1	1	0	0	1	1	1	1	1
		CH_137_sub-scaffold_83295_1	CmdA	6.2e-22	75	0	1.1e-21	74.1	0	1.3	2	0	0	2	2	2	1	1
		CH_137_sub-scaffold_5360_13	CmdA	4.2e-16	55.7	0	6.4e-16	55.1	0	1.2	1	0	0	1	1	1	1	1
		CH_137_sub-scaffold_2264_17	CmdA	1.4e-12	44.1	0.2	0.00011	17.9	0	3.4	3	1	1	4	4	4	3	1
		CH_137_sub-scaffold_9119_3	CmdA	5.3e-10	35.5	0	6.4e-07	25.3	0	2.4	3	0	0	3	3	3	2	1
		CH_137_sub-scaffold_10810_7	CmdA	1.6e-09	33.9	0.5	5e-05	19	0.1	3.1	3	0	0	3	3	3	2	1
		CH_137_sub-scaffold_1750_1	CmdA	2.1e-09	33.5	0	8.6e-09	31.5	0	1.7	1	1	0	1	1	1	1	1
		CH_137_sub-scaffold_2092_5	DszC	1.5e-15	54.5	0.4	1.2e-13	48.2	0.4	2.1	1	1	0	1	1	1	1	1
		CH_137_sub-scaffold_1910_8	DszC	7.4e-14	48.9	0	3.2e-13	46.8	0	1.9	1	1	0	1	1	1	1	1
		CH_137_sub-scaffold_9583_12	DszC	1e-05	22.1	0.1	1.7e-05	21.4	0.1	1.4	1	1	0	1	1	1	1	1
		CH_137_sub-scaffold_26187_5	DszC	0.00097	15.6	0	0.0055	13.1	0	1.8	2	0	0	2	2	2	1	0
		CH_137_sub-scaffold_4342_7	DszC	0.026	10.9	0	0.095	9	0	1.7	2	0	0	2	2	2	0	0
		CH_137_sub-scaffold_83295_1	EbdA	2.3e-24	82.8	0	1e-13	47.5	0	2.9	2	1	1	3	3	3	3	1
		CH_137_sub-scaffold_9119_3	EbdA	2.1e-23	79.6	0.3	8e-12	41.3	0	3.6	3	1	1	4	4	4	3	1
		CH_137_sub-scaffold_2264_17	EbdA	6.9e-22	74.6	0.1	1.1e-08	30.9	0	4	3	1	1	4	4	4	4	1
		CH_137_sub-scaffold_5360_13	EbdA	6.4e-14	48.2	0.1	2.5e-12	43	0	2.9	3	1	0	3	3	3	1	1
		CH_137_sub-scaffold_10810_7	EbdA	3.2e-13	45.9	0.3	8.2e-12	41.2	0.4	2.6	2	1	0	2	2	2	1	1
		CH_137_sub-scaffold_1750_1	EbdA	1.6e-09	33.7	0	0.00026	16.4	0	2.1	2	0	0	2	2	2	2	1
		CH_137_sub-scaffold_2264_16	EbdA	0.0038	12.5	0	0.0045	12.3	0	1	1	0	0	1	1	1	1	0
		CH_137_sub-scaffold_4806_18	K27540	1.1e-95	318.9	0	1.3e-95	318.7	0	1	1	0	0	1	1	1	1	1
		CH_137_sub-scaffold_21801_6	K27540	3.3e-30	103	0.1	3.6e-30	102.9	0.1	1	1	0	0	1	1	1	1	1
		CH_137_sub-scaffold_1718_6	K27540	1.6e-19	67.7	0	2.9e-19	66.9	0	1.3	1	1	0	1	1	1	1	1
		CH_137_sub-scaffold_5980_9	K27540	0.0018	14.8	0	0.0019	14.8	0	1	1	0	0	1	1	1	1	0
		CH_137_sub-scaffold_2757_13	NmsA	0	1548	0.7	0	1547.8	0.7	1	1	0	0	1	1	1	1	1
		CH_137_sub-scaffold_2426_53	NmsA	0	1085.5	1.1	0	1085.2	1.1	1	1	0	0	1	1	1	1	1
		CH_137_sub-scaffold_2426_58	NmsA	0	1020.5	0.2	0	1020.2	0.2	1	1	0	0	1	1	1	1	1
CH_139	Bacteroidota	CH_139-scaffold_6728_12	AlkB	1.2e-06	24.6	0	1.3e-06	24.5	0	1	1	0	0	1	1	1	1	1
		CH_139-scaffold_341_17	AlkB	0.0034	13.2	0.7	0.0079	12	0.7	1.5	1	0	0	1	1	1	1	0
		CH_139-scaffold_3758_8	AlkB	6.7	2.3	13.1	9.5	1.8	13.1	1.4	1	0	0	1	1	1	0	0
		CH_139-scaffold_342_18	AlmA_GroupI	2.8e-07	26.4	0.8	0.0037	12.8	0.1	3.1	1	1	3	4	4	4	2	1
		CH_139-scaffold_3995_12	AlmA_GroupI	0.00058	15.5	0.1	0.088	8.3	0	2.4	2	0	0	2	2	2	2	0
		CH_139-scaffold_2418_1	AlmA_GroupI	0.023	10.2	0.4	0.22	7	0	2.4	3	0	0	3	3	3	0	0
		CH_139-scaffold_342_25	AssA	5.6e-127	421.7	0	7.1e-127	421.4	0	1	1	0	0	1	1	1	1	1
		CH_139-scaffold_16262_1	AssA	0.0037	12.1	0.1	0.0052	11.6	0.1	1.1	1	0	0	1	1	1	1	0
		CH_139-scaffold_342_25	BssA	7.9e-110	364.9	0	1.1e-109	364.4	0	1.1	1	0	0	1	1	1	1	1
		CH_139-scaffold_8341_3	DszC	1.4e-17	60.4	0.5	1.4e-16	57.1	0.5	2	1	1	0	1	1	1	1	1
		CH_139-scaffold_16881_3	DszC	3.4e-14	49.2	0.1	5.6e-14	48.5	0.1	1.2	1	0	0	1	1	1	1	1
		CH_139-scaffold_27219_2	DszC	1.4e-11	40.6	0	8.1e-11	38.1	0	1.9	2	0	0	2	2	2	1	1
		CH_139-scaffold_342_25	NmsA	1.7e-101	337.4	0	2.1e-101	337.1	0	1	1	0	0	1	1	1	1	1
CH_140	Chloroflexota	CH_140-scaffold_41702_1	AhyA	2.1e-34	115.4	0	5.3e-31	104.1	0	3	3	0	0	3	3	3	3	1
		CH_140-scaffold_29917_1	AhyA	2.4e-28	95.3	0	6e-13	44.4	0	4	3	1	1	4	4	4	4	1
		CH_140-scaffold_93061_1	AhyA	7.2e-21	70.6	0	1.8e-17	59.3	0	3	3	0	0	3	3	3	3	1
		CH_140-scaffold_37996_5	AhyA	4.7e-07	24.9	0	0.00081	14.2	0	2.1	2	0	0	2	2	2	2	1
		CH_140-scaffold_40020_2	AhyA	4.5e-06	21.6	0	0.00013	16.8	0	2.4	2	1	1	3	3	3	1	1
		CH_140-scaffold_37704_3	AlkB	7.4e-06	21.7	0	8.7e-06	21.5	0	1.1	1	0	0	1	1	1	1	1
		CH_140-scaffold_3319_8	AlkB	2.6	3.4	10.8	3.4	3	10.8	1.2	1	0	0	1	1	1	0	0
		CH_140-scaffold_41702_1	CmdA	5.8e-17	57.5	0	8.1e-09	30.5	0.1	2.6	3	0	0	3	3	3	2	1
		CH_140-scaffold_29917_1	CmdA	1.7e-12	42.7	0	3.9e-08	28.3	0	3.1	3	0	0	3	3	3	2	1
		CH_140-scaffold_93061_1	CmdA	1.4e-07	26.5	0	1.1e-06	23.5	0	2	2	0	0	2	2	2	1	1
		CH_140-scaffold_37996_5	CmdA	2.2e-05	19.1	0	0.00018	16.1	0	1.9	2	0	0	2	2	2	1	1
		CH_140-scaffold_32756_3	DszC	2.1e-23	79.3	0	7.6e-23	77.4	0	1.7	1	1	0	1	1	1	1	1
		CH_140-scaffold_8090_6	DszC	8.6e-08	27.9	0	1.2e-07	27.4	0	1.3	1	0	0	1	1	1	1	1
		CH_140-scaffold_8090_7	DszC	5.5e-07	25.2	0	8e-07	24.7	0	1.1	1	0	0	1	1	1	1	1
		CH_140-scaffold_41702_1	EbdA	7.4e-28	93.3	0	1e-24	82.9	0	3.1	3	0	0	3	3	3	3	1
		CH_140-scaffold_29917_1	EbdA	1.2e-22	76	0.1	6.1e-10	34	0	4.1	3	1	1	4	4	4	4	1
		CH_140-scaffold_93061_1	EbdA	6e-17	57.2	0	6e-15	50.5	0	2.8	3	0	0	3	3	3	2	1
		CH_140-scaffold_37996_5	EbdA	1.3e-06	23	0	0.00048	14.5	0	2.1	2	0	0	2	2	2	2	1
		CH_140-scaffold_40020_2	EbdA	4.1e-06	21.3	0	0.00025	15.4	0	2.2	2	0	0	2	2	2	2	1
CH_140_sub	Desulfobacterota	CH_140_sub-scaffold_31317_2	AbcA_1	1.6e-40	136.7	0.1	5.5e-40	135	0.1	1.6	1	1	0	1	1	1	1	1
		CH_140_sub-scaffold_87_40	AbcA_1	0.018	11.2	0	0.021	11	0	1.1	1	0	0	1	1	1	0	0
		CH_140_sub-scaffold_31317_2	AbcA_2	1.3e-161	535.9	0.1	1.6e-161	535.6	0.1	1	1	0	0	1	1	1	1	1
		CH_140_sub-scaffold_197_22	AhyA	0	1761.6	1.5	0	1761.4	1.5	1	1	0	0	1	1	1	1	1
		CH_140_sub-scaffold_3699_1	AhyA	4.9e-37	125.1	0	5.8e-27	91.8	0	4.1	3	1	1	4	4	4	4	1
		CH_140_sub-scaffold_75_58	AhyA	2.2e-34	116.3	0	8.1e-17	58.2	0	3	3	0	0	3	3	3	3	1
		CH_140_sub-scaffold_1014_15	AhyA	4e-34	115.5	0	1.4e-22	77.2	0	4	3	1	1	4	4	4	3	1
		CH_140_sub-scaffold_4607_10	AhyA	1.1e-27	94.1	0	1.4e-13	47.4	0	3.1	3	0	0	3	3	3	3	1
		CH_140_sub-scaffold_1959_5	AhyA	3.4e-22	76	0	1.9e-09	33.8	0	4.1	3	1	1	4	4	4	4	1
		CH_140_sub-scaffold_92_1	AhyA	6.3e-18	61.8	0.3	5.2e-05	19.1	0.1	4	3	1	1	4	4	4	3	1
		CH_140_sub-scaffold_442_10	AhyA	2.3e-17	60	0	6e-11	38.7	0	3.5	2	1	1	3	3	3	3	1
		CH_140_sub-scaffold_257_9	AhyA	1.2e-16	57.6	0.1	6.4e-07	25.4	0	4	3	1	1	4	4	4	4	1
		CH_140_sub-scaffold_9800_4	AhyA	1.3e-15	54.2	0	1.6e-15	53.9	0	1	1	0	0	1	1	1	1	1
		CH_140_sub-scaffold_828_46	AhyA	3e-06	23.2	0	3.8e-06	22.9	0	1.1	1	0	0	1	1	1	1	1
		CH_140_sub-scaffold_4607_12	AhyA	5e-05	19.1	0	5.7e-05	18.9	0	1.1	1	0	0	1	1	1	1	1
		CH_140_sub-scaffold_257_10	AhyA	0.0011	14.8	0	0.0014	14.4	0	1.1	1	0	0	1	1	1	1	0
		CH_140_sub-scaffold_76_16	AhyA	0.035	9.7	0.1	0.044	9.4	0.1	1.1	1	0	0	1	1	1	0	0
		CH_140_sub-scaffold_48_11	AlkB	0.018	11.5	0.8	0.13	8.6	0	2.1	2	0	0	2	2	2	0	0
		CH_140_sub-scaffold_1959_6	AlkB	0.93	5.8	12.1	1.1	5.6	12.1	1.2	1	0	0	1	1	1	0	0
		CH_140_sub-scaffold_285_9	AlmA_GroupI	0.002	14.4	0	0.0028	13.9	0	1.1	1	0	0	1	1	1	1	0
		CH_140_sub-scaffold_239_9	AlmA_GroupI	0.0022	14.3	0.1	0.0031	13.8	0.1	1.2	1	0	0	1	1	1	1	0
		CH_140_sub-scaffold_1314_16	AlmA_GroupI	0.0099	12.1	0	0.015	11.5	0	1.1	1	0	0	1	1	1	1	0
		CH_140_sub-scaffold_35_64	AlmA_GroupI	0.013	11.7	0.1	1.1	5.4	0	2.5	2	1	1	3	3	3	0	0
		CH_140_sub-scaffold_828_43	AlmA_GroupIII	0.004	13.4	0	0.0064	12.8	0	1.3	1	0	0	1	1	1	1	0
		CH_140_sub-scaffold_285_9	AlmA_GroupIII	0.022	11	0	0.03	10.6	0	1.1	1	0	0	1	1	1	0	0
		CH_140_sub-scaffold_1314_16	AlmA_GroupIII	0.028	10.7	0	0.04	10.2	0	1.2	1	0	0	1	1	1	0	0
		CH_140_sub-scaffold_50_16	AssA	0	1520.1	0.2	0	1519.9	0.2	1	1	0	0	1	1	1	1	1
		CH_140_sub-scaffold_97_26	AssA	1.1e-107	358.6	0	2.5e-98	327.7	0	2	2	0	0	2	2	2	2	1
		CH_140_sub-scaffold_384_20	AssA	3.8e-94	313.8	0	6.9e-94	312.9	0	1.3	1	1	0	1	1	1	1	1
		CH_140_sub-scaffold_384_2	AssA	9.7e-88	292.6	0	1.2e-87	292.3	0	1.1	1	0	0	1	1	1	1	1
		CH_140_sub-scaffold_3200_9	AssA	9.9e-87	289.3	0	1.3e-86	288.9	0	1.1	1	0	0	1	1	1	1	1
		CH_140_sub-scaffold_2713_3	AssA	6e-81	270.1	0	1.1e-80	269.3	0	1.3	1	0	0	1	1	1	1	1
		CH_140_sub-scaffold_2070_7	AssA	6.5e-72	240.2	0	2.1e-71	238.5	0	1.7	1	1	0	1	1	1	1	1
		CH_140_sub-scaffold_235_34	AssA	6.3e-67	223.7	0.1	3.5e-34	115.4	0.1	2.3	2	0	0	2	2	2	2	1
		CH_140_sub-scaffold_384_18	AssA	9.8e-11	37.9	0	1.2e-10	37.6	0	1	1	0	0	1	1	1	1	1
		CH_140_sub-scaffold_50_16	BssA	2.9e-188	625.1	0	3.3e-188	624.9	0	1	1	0	0	1	1	1	1	1
		CH_140_sub-scaffold_97_26	BssA	3.6e-90	300.6	0	2.5e-82	274.7	0	2	2	0	0	2	2	2	2	1
		CH_140_sub-scaffold_2713_3	BssA	2.8e-75	251.3	0	5.5e-75	250.3	0	1.4	1	1	0	1	1	1	1	1
		CH_140_sub-scaffold_2070_7	BssA	2.4e-73	244.9	0	5.9e-73	243.6	0	1.5	1	1	0	1	1	1	1	1
		CH_140_sub-scaffold_3200_9	BssA	7.3e-72	240	0	4.1e-71	237.5	0	1.8	1	1	0	1	1	1	1	1
		CH_140_sub-scaffold_384_2	BssA	2.6e-71	238.2	0	6.2e-71	236.9	0	1.5	2	0	0	2	2	2	1	1
		CH_140_sub-scaffold_384_20	BssA	1.9e-67	225.4	0	8.7e-67	223.2	0	1.8	1	1	0	1	1	1	1	1
		CH_140_sub-scaffold_235_34	BssA	1.4e-55	186.1	0.1	5.5e-27	91.5	0	3	2	1	0	2	2	2	2	1
		CH_140_sub-scaffold_384_18	BssA	4e-08	29.1	0	4e-08	29.1	0	1	1	0	0	1	1	1	1	1
		CH_140_sub-scaffold_197_22	CmdA	9.5e-204	676.7	0.9	3.1e-203	675	0.9	1.7	1	1	0	1	1	1	1	1
		CH_140_sub-scaffold_1014_15	CmdA	2.6e-31	105.9	0	7.4e-17	58.1	0	3.8	3	1	0	3	3	3	3	1
		CH_140_sub-scaffold_3699_1	CmdA	1.1e-29	100.6	0	3.6e-19	65.8	0	3.1	3	0	0	3	3	3	3	1
		CH_140_sub-scaffold_75_58	CmdA	3.1e-17	59.3	0	1.9e-08	30.3	0	3	3	0	0	3	3	3	3	1
		CH_140_sub-scaffold_1959_5	CmdA	2.9e-16	56.1	0.2	1.4e-05	20.8	0	4.4	3	1	1	4	4	4	4	1
		CH_140_sub-scaffold_92_1	CmdA	6.5e-15	51.7	0.7	0.00011	17.8	0.1	4	3	1	1	4	4	4	4	1
		CH_140_sub-scaffold_442_10	CmdA	2.1e-10	36.7	0	8.3e-10	34.8	0	1.7	2	0	0	2	2	2	1	1
		CH_140_sub-scaffold_9800_4	CmdA	7.1e-10	35	0	8.7e-10	34.7	0	1.1	1	0	0	1	1	1	1	1
		CH_140_sub-scaffold_4607_10	CmdA	5.4e-08	28.8	0	0.0032	13	0	3	3	0	0	3	3	3	2	1
		CH_140_sub-scaffold_257_9	CmdA	1.9e-07	27	0.1	0.018	10.5	0	3.4	3	1	1	4	4	4	3	1
		CH_140_sub-scaffold_4607_12	CmdA	0.0098	11.4	0	0.012	11.1	0	1	1	0	0	1	1	1	1	0
		CH_140_sub-scaffold_76_16	CmdA	0.043	9.2	0	0.052	9	0	1.1	1	0	0	1	1	1	0	0
		CH_140_sub-scaffold_1152_19	DszC	3.1e-15	53.4	0	1.7e-13	47.6	0	2.1	2	0	0	2	2	2	1	1
		CH_140_sub-scaffold_33_12	DszC	3e-13	46.8	0	4.1e-13	46.4	0	1.1	1	0	0	1	1	1	1	1
		CH_140_sub-scaffold_285_20	DszC	2.2e-10	37.4	0	9.7e-09	32	0	2	2	0	0	2	2	2	1	1
		CH_140_sub-scaffold_807_22	DszC	5.8e-09	32.7	0.1	2e-07	27.6	0.1	2.4	1	1	0	1	1	1	1	1
		CH_140_sub-scaffold_285_19	DszC	1.1e-08	31.8	0	4.8e-07	26.4	0	2	2	0	0	2	2	2	1	1
		CH_140_sub-scaffold_1152_6	DszC	3.6e-08	30.1	0	4.9e-08	29.6	0	1.1	1	0	0	1	1	1	1	1
		CH_140_sub-scaffold_1516_10	DszC	5.5e-08	29.5	0	0.003	13.9	0	2.2	2	0	0	2	2	2	2	1
		CH_140_sub-scaffold_16131_2	DszC	3.3e-07	26.9	0	6.3e-07	26	0	1.4	2	0	0	2	2	2	1	1
		CH_140_sub-scaffold_2591_10	DszC	4.8e-07	26.4	0	1e-06	25.3	0	1.5	2	0	0	2	2	2	1	1
		CH_140_sub-scaffold_52_12	DszC	2.7e-06	23.9	0.2	3.9e-06	23.4	0.2	1.4	1	1	0	1	1	1	1	1
		CH_140_sub-scaffold_121_17	DszC	1.2e-05	21.7	0	1.6e-05	21.4	0	1.2	1	0	0	1	1	1	1	1
		CH_140_sub-scaffold_807_21	DszC	2.2e-05	20.9	0.1	5.7e-05	19.5	0	1.5	1	1	1	2	2	2	1	1
		CH_140_sub-scaffold_1516_9	DszC	5.2e-05	19.7	0.1	0.021	11.1	0.3	2.7	2	1	0	2	2	2	1	1
		CH_140_sub-scaffold_1470_3	DszC	5.3e-05	19.6	0.1	0.0001	18.7	0.1	1.4	1	0	0	1	1	1	1	1
		CH_140_sub-scaffold_513_2	DszC	6.5e-05	19.4	0	0.00075	15.8	0	2.2	2	0	0	2	2	2	1	1
		CH_140_sub-scaffold_33_11	DszC	0.00019	17.8	0.3	0.00046	16.6	0	1.7	2	0	0	2	2	2	1	0
		CH_140_sub-scaffold_2713_4	DszC	0.00042	16.7	0	0.0045	13.3	0	2.1	2	0	0	2	2	2	1	0
		CH_140_sub-scaffold_604_4	DszC	0.00057	16.2	0.2	0.0016	14.8	0	1.8	2	0	0	2	2	2	1	0
		CH_140_sub-scaffold_52_66	DszC	0.0022	14.3	0	0.052	9.8	0	2.6	2	1	0	2	2	2	1	0
		CH_140_sub-scaffold_486_18	DszC	0.0044	13.3	0	0.012	11.9	0	1.6	1	1	0	1	1	1	1	0
		CH_140_sub-scaffold_7011_6	DszC	0.0061	12.9	0	0.85	5.8	0	2.3	2	0	0	2	2	2	1	0
		CH_140_sub-scaffold_486_17	DszC	0.0091	12.3	0.3	1.4	5.1	0	2.2	2	0	0	2	2	2	1	0
		CH_140_sub-scaffold_5301_7	DszC	0.013	11.8	0	0.051	9.8	0	1.9	1	1	0	1	1	1	0	0
		CH_140_sub-scaffold_197_12	DszC	0.016	11.5	0.2	0.036	10.3	0.2	1.6	1	1	0	1	1	1	0	0
		CH_140_sub-scaffold_197_22	EbdA	2e-291	966.6	0.2	2.7e-291	966.2	0.2	1.2	1	0	0	1	1	1	1	1
		CH_140_sub-scaffold_3699_1	EbdA	1.7e-40	136.1	0	8.3e-34	113.9	0	3.9	3	1	1	4	4	4	3	1
		CH_140_sub-scaffold_1014_15	EbdA	1.9e-26	89.6	0	1.3e-14	50.4	0	4.7	3	1	1	4	4	4	3	1
		CH_140_sub-scaffold_75_58	EbdA	1.3e-22	76.9	0.1	8.6e-11	37.8	0	3.1	3	0	0	3	3	3	3	1
		CH_140_sub-scaffold_4607_10	EbdA	3.1e-20	69	0	2.1e-13	46.4	0	3	3	0	0	3	3	3	3	1
		CH_140_sub-scaffold_92_1	EbdA	5.1e-18	61.7	0.1	1e-08	30.9	0	4	3	1	1	4	4	4	4	1
		CH_140_sub-scaffold_257_9	EbdA	4.4e-15	52	0	2.7e-07	26.2	0	3.8	3	1	1	4	4	4	3	1
		CH_140_sub-scaffold_1959_5	EbdA	5.4e-14	48.3	0.3	1.6e-06	23.6	0.1	4.8	3	1	1	4	4	4	4	1
		CH_140_sub-scaffold_442_10	EbdA	3.8e-13	45.5	0	2.3e-05	19.8	0	3.8	2	1	1	3	3	3	3	1
		CH_140_sub-scaffold_9800_4	EbdA	3.2e-11	39.2	0	3.8e-11	38.9	0	1	1	0	0	1	1	1	1	1
		CH_140_sub-scaffold_828_46	EbdA	0.0004	15.7	0	0.00051	15.3	0	1.1	1	0	0	1	1	1	1	0
		CH_140_sub-scaffold_76_16	EbdA	0.0021	13.3	0	0.0025	13	0	1.1	1	0	0	1	1	1	1	0
		CH_140_sub-scaffold_31317_2	K27540	1.2e-52	176.9	0.6	5.5e-52	174.7	0.5	1.9	2	1	0	2	2	2	1	1
		CH_140_sub-scaffold_50_16	NmsA	2.3e-171	569.2	0	2.7e-171	568.9	0	1	1	0	0	1	1	1	1	1
		CH_140_sub-scaffold_97_26	NmsA	2.5e-89	297.8	0	1.5e-76	255.6	0	2	2	0	0	2	2	2	2	1
		CH_140_sub-scaffold_2713_3	NmsA	7.1e-71	236.8	0	6.7e-70	233.5	0	1.9	1	1	0	1	1	1	1	1
		CH_140_sub-scaffold_384_20	NmsA	8.1e-71	236.6	0	3.3e-65	218	0	2	2	0	0	2	2	2	2	1
		CH_140_sub-scaffold_3200_9	NmsA	9.8e-66	219.8	0	2.7e-58	195.1	0	2	2	0	0	2	2	2	2	1
		CH_140_sub-scaffold_384_2	NmsA	1.6e-65	219.1	0	6.5e-63	210.4	0	2	2	0	0	2	2	2	2	1
		CH_140_sub-scaffold_2070_7	NmsA	5.5e-58	194.1	0	5.1e-57	190.9	0	1.9	1	1	0	1	1	1	1	1
		CH_140_sub-scaffold_235_34	NmsA	1.2e-56	189.7	0.1	1.3e-29	100.3	0	2.9	2	1	0	2	2	2	2	1
		CH_140_sub-scaffold_384_18	NmsA	7.1e-08	28.4	0	7.1e-08	28.4	0	1	1	0	0	1	1	1	1	1
CH_141_sub	Desulfobacterota	CH_141_sub-scaffold_28633_3	AbcA_1	7.2e-66	220.4	0.1	8.6e-66	220.2	0.1	1	1	0	0	1	1	1	1	1
		CH_141_sub-scaffold_17124_2	AbcA_1	1.6e-59	199.5	0	1.8e-59	199.4	0	1	1	0	0	1	1	1	1	1
		CH_141_sub-scaffold_43687_7	AbcA_1	5.7e-08	29.4	0	7.8e-08	29	0	1.1	1	0	0	1	1	1	1	1
		CH_141_sub-scaffold_43687_6	AbcA_1	0.0038	13.5	0	0.004	13.4	0	1	1	0	0	1	1	1	1	0
		CH_141_sub-scaffold_17124_2	AbcA_2	5.5e-66	220.6	0.1	1.9e-64	215.6	0.1	2	1	1	0	1	1	1	1	1
		CH_141_sub-scaffold_28633_3	AbcA_2	4.5e-64	214.3	0.2	6.8e-62	207.1	0.2	2	1	1	0	1	1	1	1	1
		CH_141_sub-scaffold_43687_7	AbcA_2	7.3e-40	134.4	0	1.4e-39	133.6	0	1.4	2	0	0	2	2	2	1	1
		CH_141_sub-scaffold_43687_6	AbcA_2	2.1e-08	30.7	0	2.2e-08	30.6	0	1	1	0	0	1	1	1	1	1
		CH_141_sub-scaffold_1835_17	AhyA	6.8e-60	200.8	0.4	2e-48	162.8	0	3.2	3	0	0	3	3	3	3	1
		CH_141_sub-scaffold_1835_15	AhyA	2.4e-59	199	0.1	1.7e-47	159.8	0	3	3	0	0	3	3	3	3	1
		CH_141_sub-scaffold_5559_6	AhyA	2e-46	156.2	0	3.1e-35	119.2	0	4	3	1	1	4	4	4	4	1
		CH_141_sub-scaffold_1732_13	AhyA	9.9e-46	153.9	0.1	2.8e-26	89.6	0	4.2	2	2	2	4	4	4	4	1
		CH_141_sub-scaffold_11471_5	AhyA	1.4e-42	143.5	1.6	1.2e-22	77.5	0	4	1	1	2	4	4	4	4	1
		CH_141_sub-scaffold_54611_4	AhyA	8.1e-33	111.2	0	3.6e-23	79.3	0	3	2	1	1	3	3	3	3	1
		CH_141_sub-scaffold_21931_3	AhyA	4.1e-23	79.1	0.4	3.1e-13	46.4	0	4.7	2	2	2	4	4	4	3	1
		CH_141_sub-scaffold_7291_10	AhyA	2.1e-22	76.7	0.4	4.3e-07	26.1	0	4	3	1	1	4	4	4	4	1
		CH_141_sub-scaffold_5467_5	AhyA	6.4e-21	71.8	0.8	2.3e-06	23.7	0	4	3	1	1	4	4	4	4	1
		CH_141_sub-scaffold_7871_10	AhyA	2.9e-20	69.6	0.5	4.2e-19	65.8	0.3	2.4	2	1	0	2	2	2	1	1
		CH_141_sub-scaffold_758_10	AhyA	4.4e-20	69	0	1.1e-07	28	0	4	3	1	1	4	4	4	4	1
		CH_141_sub-scaffold_28924_1	AhyA	2.6e-18	63.2	3.9	1.5e-12	44.1	0	4.2	3	1	0	4	4	4	3	1
		CH_141_sub-scaffold_6552_4	AhyA	4.7e-16	55.7	0.2	3.4e-10	36.3	0.1	3.9	4	0	0	4	4	4	2	1
		CH_141_sub-scaffold_5467_6	AhyA	3.8e-05	19.6	0	4.2e-05	19.4	0	1	1	0	0	1	1	1	1	1
		CH_141_sub-scaffold_7291_9	AhyA	0.0052	12.5	0	0.0052	12.5	0	1	1	0	0	1	1	1	1	0
		CH_141_sub-scaffold_758_11	AhyA	0.014	11.1	0	0.018	10.7	0	1.1	1	0	0	1	1	1	0	0
		CH_141_sub-scaffold_21280_4	AlkB	0.00044	16.9	0	0.00044	16.9	0	1	1	0	0	1	1	1	1	0
		CH_141_sub-scaffold_7296_8	AlkB	0.001	15.6	0	0.001	15.6	0	1	1	0	0	1	1	1	1	0
		CH_141_sub-scaffold_48492_2	AlkB	0.0083	12.7	0.1	0.014	11.9	0.1	1.4	1	0	0	1	1	1	1	0
		CH_141_sub-scaffold_12727_3	AlmA_GroupI	0.0019	14.5	0	0.019	11.2	0	2	2	0	0	2	2	2	1	0
		CH_141_sub-scaffold_431_21	AlmA_GroupI	0.016	11.4	0.1	0.18	8	0	2	2	0	0	2	2	2	0	0
		CH_141_sub-scaffold_1732_19	AlmA_GroupI	0.021	11.1	0	0.81	5.9	0	2.3	2	0	0	2	2	2	0	0
		CH_141_sub-scaffold_7307_12	AlmA_GroupI	0.029	10.6	1.3	0.48	6.6	0	2.7	3	0	0	3	3	3	0	0
		CH_141_sub-scaffold_7307_12	AlmA_GroupIII	0.00038	16.9	2	0.23	7.7	0.2	3.1	3	0	0	3	3	3	3	0
		CH_141_sub-scaffold_9557_1	AlmA_GroupIII	0.0019	14.6	0	0.21	7.8	0	2.1	2	0	0	2	2	2	2	0
		CH_141_sub-scaffold_431_21	AlmA_GroupIII	0.0026	14.1	0	0.33	7.2	0	2.2	2	0	0	2	2	2	2	0
		CH_141_sub-scaffold_1835_17	CmdA	1.1e-41	140.3	0.6	1.9e-32	109.7	0	3.4	3	1	0	3	3	3	2	1
		CH_141_sub-scaffold_1835_15	CmdA	5.3e-39	131.5	0.2	3.1e-28	95.8	0	3.3	3	1	0	3	3	3	3	1
		CH_141_sub-scaffold_5559_6	CmdA	2.9e-31	105.9	0.1	3.5e-20	69.2	0	3.9	3	1	0	3	3	3	3	1
		CH_141_sub-scaffold_1732_13	CmdA	1.3e-24	83.8	0	7.6e-18	61.4	0	4	2	2	2	4	4	4	3	1
		CH_141_sub-scaffold_11471_5	CmdA	2.1e-23	79.8	1.6	4.1e-15	52.4	0.1	4	3	1	1	4	4	4	3	1
		CH_141_sub-scaffold_54611_4	CmdA	1.2e-17	60.7	0.1	3.2e-14	49.4	0.1	3.1	2	1	1	3	3	3	2	1
		CH_141_sub-scaffold_7871_10	CmdA	5.9e-15	51.9	0	9.6e-15	51.2	0	1.2	1	0	0	1	1	1	1	1
		CH_141_sub-scaffold_21931_3	CmdA	1.8e-13	47	0	6.3e-12	41.8	0	2.4	3	0	0	3	3	3	1	1
		CH_141_sub-scaffold_5467_5	CmdA	3.8e-13	45.9	0.3	5.3e-05	18.9	0	3.8	3	1	1	4	4	4	3	1
		CH_141_sub-scaffold_758_10	CmdA	3.7e-10	36	0	0.0024	13.4	0	3.1	3	0	0	3	3	3	3	1
		CH_141_sub-scaffold_28924_1	CmdA	1.9e-07	27	0.2	6.7e-05	18.6	0	3.4	3	1	1	4	4	4	1	1
		CH_141_sub-scaffold_6552_4	CmdA	2.8e-06	23.1	0.2	0.0044	12.6	0.2	2.9	3	0	0	3	3	3	2	1
		CH_141_sub-scaffold_7291_10	CmdA	0.0002	17	0.3	0.1	8.1	0	3	2	1	1	3	3	3	2	0
		CH_141_sub-scaffold_758_7	DszC	3.4e-20	69.7	0.6	7.9e-19	65.3	0.6	2	1	1	0	1	1	1	1	1
		CH_141_sub-scaffold_6756_2	DszC	9.9e-15	51.7	0.1	2e-13	47.4	0.1	2	1	1	0	1	1	1	1	1
		CH_141_sub-scaffold_13350_4	DszC	1.2e-14	51.5	0.4	1.1e-12	45.1	0.4	2	1	1	0	1	1	1	1	1
		CH_141_sub-scaffold_7870_2	DszC	3.6e-07	26.8	0.1	8.9e-07	25.5	0.1	1.7	1	1	0	1	1	1	1	1
		CH_141_sub-scaffold_15211_4	DszC	6.2e-06	22.8	0	4.3e-05	20	0	1.9	2	0	0	2	2	2	1	1
		CH_141_sub-scaffold_7870_8	DszC	0.00031	17.2	0	0.0006	16.2	0	1.4	1	0	0	1	1	1	1	0
		CH_141_sub-scaffold_9548_1	DszC	0.0051	13.2	0	0.0056	13	0	1.1	1	0	0	1	1	1	1	0
		CH_141_sub-scaffold_2909_7	DszC	0.013	11.8	0	0.18	8.1	0	2.3	3	0	0	3	3	3	0	0
		CH_141_sub-scaffold_1835_15	EbdA	1.1e-45	153.3	0	1.3e-38	129.9	0	3	3	0	0	3	3	3	3	1
		CH_141_sub-scaffold_1835_17	EbdA	6.6e-44	147.4	0.3	6.3e-23	78	0	4	3	1	1	4	4	4	4	1
		CH_141_sub-scaffold_1732_13	EbdA	1.7e-41	139.4	0.2	8.3e-26	87.5	0	4.2	2	2	2	4	4	4	4	1
		CH_141_sub-scaffold_5559_6	EbdA	1.5e-33	113.2	0	1.4e-19	67	0	4.7	3	1	1	4	4	4	4	1
		CH_141_sub-scaffold_54611_4	EbdA	9.9e-31	103.8	0	1.1e-20	70.6	0.1	3.1	2	1	1	3	3	3	3	1
		CH_141_sub-scaffold_11471_5	EbdA	2.2e-30	102.7	0.3	4.7e-15	51.9	0	3.8	3	1	1	4	4	4	3	1
		CH_141_sub-scaffold_5467_5	EbdA	6.9e-17	58	0.1	1.1e-05	20.9	0	4	3	1	1	4	4	4	4	1
		CH_141_sub-scaffold_758_10	EbdA	8.9e-16	54.3	0	4.5e-08	28.8	0	3.7	3	1	1	4	4	4	3	1
		CH_141_sub-scaffold_7291_10	EbdA	2.3e-15	53	0	9.1e-05	17.9	0	4	3	1	1	4	4	4	4	1
		CH_141_sub-scaffold_7871_10	EbdA	1.5e-14	50.2	0.1	1.4e-09	33.8	0	3.3	4	0	0	4	4	4	2	1
		CH_141_sub-scaffold_21931_3	EbdA	6.1e-13	44.9	0.1	6.2e-05	18.4	0	3.9	2	1	2	4	4	4	3	1
		CH_141_sub-scaffold_28924_1	EbdA	1.2e-12	43.9	0.3	0.00033	16	0	4.9	5	0	0	5	5	5	3	1
		CH_141_sub-scaffold_6552_4	EbdA	1.8e-08	30.1	0.4	0.00028	16.2	0.2	3	3	0	0	3	3	3	2	1
		CH_141_sub-scaffold_5467_6	EbdA	0.00047	15.5	0	0.00056	15.3	0	1	1	0	0	1	1	1	1	0
		CH_141_sub-scaffold_54611_3	EbdA	0.0059	11.9	0	0.0065	11.7	0	1	1	0	0	1	1	1	1	0
		CH_141_sub-scaffold_28633_3	K27540	2.9e-104	347.2	0.1	3.3e-104	347	0.1	1	1	0	0	1	1	1	1	1
		CH_141_sub-scaffold_17124_2	K27540	5.8e-93	309.9	0	6.9e-93	309.7	0	1	1	0	0	1	1	1	1	1
		CH_141_sub-scaffold_43687_7	K27540	1.5e-11	41.4	0	2.1e-11	41	0	1.1	1	0	0	1	1	1	1	1
		CH_141_sub-scaffold_43687_6	K27540	2.9e-06	24	0	2.9e-06	24	0	1.1	1	0	0	1	1	1	1	1
		CH_141_sub-scaffold_4805_3	LadA_alpha	0.01	12.1	0.6	0.021	11	0.6	1.5	1	0	0	1	1	1	0	0
		CH_141_sub-scaffold_2495_3	LadA_beta	0.0047	13.4	0	0.0059	13.1	0	1.1	1	0	0	1	1	1	1	0
		CH_141_sub-scaffold_36675_2	NmsA	0.014	10.9	0.3	0.34	6.3	0	2.1	2	0	0	2	2	2	0	0
CH_142	Chloroflexota	CH_142-scaffold_509_35	AhyA	2.1e-15	53.2	0	1.1e-06	24.4	0	3.3	2	1	1	3	3	3	3	1
		CH_142-scaffold_509_34	AhyA	4.6e-06	22.3	0.1	5.1e-06	22.2	0.1	1	1	0	0	1	1	1	1	1
		CH_142-scaffold_410_11	AhyA	7.1e-06	21.7	0	2.3e-05	20	0	1.7	2	0	0	2	2	2	1	1
		CH_142-scaffold_23970_2	AlmA_GroupI	0.0015	14.6	0	0.0023	14	0	1.2	1	0	0	1	1	1	1	0
		CH_142-scaffold_1225_9	AlmA_GroupI	0.0047	12.9	0.1	0.0073	12.3	0.1	1.2	1	0	0	1	1	1	1	0
		CH_142-scaffold_23172_3	AlmA_GroupI	0.0052	12.8	0	0.0077	12.2	0	1.3	1	0	0	1	1	1	1	0
		CH_142-scaffold_661_18	AlmA_GroupI	0.016	11.2	0	0.021	10.8	0	1.1	1	0	0	1	1	1	0	0
		CH_142-scaffold_661_18	AlmA_GroupIII	0.00077	15.6	0	0.0011	15	0	1.1	1	0	0	1	1	1	1	0
		CH_142-scaffold_1072_13	AlmA_GroupIII	0.0058	12.7	0	0.009	12.1	0	1.2	1	0	0	1	1	1	1	0
		CH_142-scaffold_23970_2	AlmA_GroupIII	0.009	12.1	0	0.024	10.7	0	1.5	2	0	0	2	2	2	1	0
		CH_142-scaffold_809_2	BssA	0.03	9.5	0	0.041	9	0	1.1	1	0	0	1	1	1	0	0
		CH_142-scaffold_509_35	CmdA	0.00019	16.8	0	0.17	7	0	2.9	3	1	1	4	4	4	2	0
		CH_142-scaffold_8986_11	DszC	5.4e-20	68.8	0.1	7.1e-16	55.2	0	2.1	2	0	0	2	2	2	2	1
		CH_142-scaffold_928_23	DszC	8.3e-14	48.4	0	9.2e-13	45	0	2	1	1	0	1	1	1	1	1
		CH_142-scaffold_249_29	DszC	1.1e-12	44.8	1.2	2.2e-10	37.1	1.2	2.1	1	1	0	1	1	1	1	1
		CH_142-scaffold_4219_7	DszC	2e-08	30.6	0	3.5e-08	29.9	0	1.4	1	1	0	1	1	1	1	1
		CH_142-scaffold_4219_6	DszC	3.5e-05	20	0	7.2e-05	19	0	1.4	2	0	0	2	2	2	1	1
		CH_142-scaffold_509_35	EbdA	5.8e-16	54.6	0	3.5e-06	22.3	0	3.2	3	0	0	3	3	3	3	1
		CH_142-scaffold_509_34	EbdA	0.00042	15.4	0	0.00042	15.4	0	1	1	0	0	1	1	1	1	0
		CH_142-scaffold_410_11	EbdA	0.012	10.6	0	0.019	9.9	0	1.2	1	0	0	1	1	1	0	0
		CH_142-scaffold_62_54	LadA_alpha	0.026	10.4	0	0.056	9.3	0	1.4	2	0	0	2	2	2	0	0
		CH_142-scaffold_62_54	LadA_beta	0.0072	12.5	0	0.01	12	0	1.4	1	1	0	1	1	1	1	0
		CH_142-scaffold_62_54	LadB	1e-12	45	0	4.3e-12	42.9	0	1.7	2	0	0	2	2	2	1	1
		CH_142-scaffold_1040_15	LadB	2.8e-05	20.4	0	0.00014	18.1	0	1.8	2	0	0	2	2	2	1	1
		CH_142-scaffold_62_39	MAH_alpha	0.0048	13	0	0.0063	12.6	0	1.1	1	0	0	1	1	1	1	0
		CH_142-scaffold_62_39	NdoB	0.00081	15.7	0	0.001	15.3	0	1.1	1	0	0	1	1	1	1	0
		CH_142-scaffold_62_39	non_NdoB_type	9e-06	22.4	0	1.2e-05	22	0	1.1	1	0	0	1	1	1	1	1
CH_144	Chloroflexota	CH_144-scaffold_21018_12	AhyA	2.8e-07	25.5	0	4.3e-07	24.9	0	1.3	1	0	0	1	1	1	1	1
		CH_144-scaffold_3285_2	AlkB	0.00011	17.8	0	0.00011	17.8	0	1	1	0	0	1	1	1	1	0
		CH_144-scaffold_19753_3	AlmA_GroupI	1.1e-06	24.1	0.1	2.8e-06	22.7	0	1.6	2	0	0	2	2	2	1	1
		CH_144-scaffold_6605_2	AlmA_GroupI	0.0016	13.7	0	0.0026	13	0	1.3	1	0	0	1	1	1	1	0
		CH_144-scaffold_7497_3	AlmA_GroupI	0.0042	12.3	2	0.4	5.7	0.1	2.8	3	0	0	3	3	3	2	0
		CH_144-scaffold_19291_1	AlmA_GroupI	0.0087	11.2	0	0.011	10.9	0	1.1	1	0	0	1	1	1	1	0
		CH_144-scaffold_6605_2	AlmA_GroupIII	0.0087	11.3	0.1	0.013	10.7	0.1	1.2	1	0	0	1	1	1	1	0
		CH_144-scaffold_19753_3	AlmA_GroupIII	0.013	10.8	0	0.023	9.9	0	1.4	1	0	0	1	1	1	0	0
		CH_144-scaffold_18051_5	AssA	7.7e-132	437.4	0	9.5e-132	437.1	0	1	1	0	0	1	1	1	1	1
		CH_144-scaffold_18051_5	BssA	1.7e-102	340.3	0	2.4e-102	339.8	0	1.1	1	0	0	1	1	1	1	1
		CH_144-scaffold_3275_6	DszC	1.1e-20	70.2	0	1.8e-19	66.3	0	2.1	1	1	0	1	1	1	1	1
		CH_144-scaffold_1346_8	DszC	4.7e-15	51.7	0.3	9.7e-15	50.7	0.3	1.6	1	1	0	1	1	1	1	1
		CH_144-scaffold_22640_2	DszC	1.7e-13	46.5	0.1	1.4e-12	43.5	0.1	1.9	1	1	0	1	1	1	1	1
		CH_144-scaffold_7104_7	DszC	7.2e-13	44.5	1.6	1.9e-11	39.8	1.6	2	1	1	0	1	1	1	1	1
		CH_144-scaffold_17036_4	DszC	4.1e-12	42	4.5	1.1e-11	40.6	0.3	2	1	1	1	2	2	2	1	1
		CH_144-scaffold_7104_6	DszC	5.9e-11	38.2	2.1	3.4e-10	35.7	2.1	1.9	1	1	0	1	1	1	1	1
		CH_144-scaffold_20001_2	DszC	2.5e-09	32.8	0.1	1.3e-08	30.4	0.1	1.9	1	1	0	1	1	1	1	1
		CH_144-scaffold_4727_3	DszC	2.1e-05	19.9	0	3.5e-05	19.2	0	1.3	1	0	0	1	1	1	1	1
		CH_144-scaffold_18051_5	NmsA	2.4e-105	349.7	0	3.9e-105	349	0	1.3	1	1	0	1	1	1	1	1
		CH_144-scaffold_66422_2	TomA3	0.0075	11.3	0.2	0.011	10.8	0.2	1.1	1	0	0	1	1	1	1	0
CH_144_sub	KSB1	CH_144_sub-scaffold_6634_5	AlkB	2e-05	21.4	0	2.2e-05	21.3	0	1	1	0	0	1	1	1	1	1
		CH_144_sub-scaffold_8617_1	AlkB	0.036	10.7	0.5	0.038	10.6	0.5	1	1	0	0	1	1	1	0	0
		CH_144_sub-scaffold_1002_21	AlmA_GroupI	0.00046	16.7	0.1	0.071	9.5	0	2.7	1	1	3	4	4	4	2	0
		CH_144_sub-scaffold_1390_1	AssA	7.2e-137	455.3	0	8.7e-137	455	0	1	1	0	0	1	1	1	1	1
		CH_144_sub-scaffold_8664_1	AssA	0.0097	11.6	0	0.01	11.5	0	1	1	0	0	1	1	1	1	0
		CH_144_sub-scaffold_1390_1	BssA	1.2e-117	391.7	0	1.6e-117	391.2	0	1.2	1	0	0	1	1	1	1	1
		CH_144_sub-scaffold_1695_14	MAH_alpha	0.0021	14.7	0	0.0026	14.3	0	1.1	1	0	0	1	1	1	1	0
		CH_144_sub-scaffold_1390_1	NmsA	2.5e-109	364.1	0	3.4e-109	363.7	0	1.1	1	0	0	1	1	1	1	1
		CH_144_sub-scaffold_8664_1	NmsA	0.0002	17.1	0	0.0002	17.1	0	1	1	0	0	1	1	1	1	0
		CH_144_sub-scaffold_1695_14	non_NdoB_type	0.0029	14.6	0	0.004	14.1	0	1.1	1	0	0	1	1	1	1	0
		CH_144_sub-scaffold_1818_6	sBmoZ	0.03	12	0	0.059	11.1	0	1.4	1	0	0	1	1	1	0	0
		CH_144_sub-scaffold_694_13	TmoB_BmoB	0.0034	15.5	0.4	0.0071	14.4	0.4	1.5	1	0	0	1	1	1	1	0
CH_149	Planctomycetota	CH_149-scaffold_13657_1	AhyA	5.8e-31	104.8	0.7	1.2e-13	47.4	0	4	3	1	1	4	4	4	4	1
		CH_149-scaffold_695_25	AlkB	0.0016	14.7	0	0.0016	14.7	0	1	1	0	0	1	1	1	1	0
		CH_149-scaffold_870_7	AlkB	0.036	10.3	3.3	0.092	8.9	0	2.4	2	0	0	2	2	2	0	0
		CH_149-scaffold_9262_1	AlmA_GroupIII	0.038	10	0	0.073	9.1	0	1.4	1	0	0	1	1	1	0	0
		CH_149-scaffold_1134_1	AssA	1.2e-81	272.3	0	1.4e-81	272	0	1	1	0	0	1	1	1	1	1
		CH_149-scaffold_1134_1	BssA	1.8e-73	245.1	0	2.1e-73	244.8	0	1	1	0	0	1	1	1	1	1
		CH_149-scaffold_13657_1	CmdA	9.7e-08	27.7	0.1	0.00051	15.4	0	3.8	3	1	1	4	4	4	4	1
		CH_149-scaffold_386_7	DszC	3.7e-06	23.2	0	1.1e-05	21.6	0	1.8	2	1	0	2	2	2	1	1
		CH_149-scaffold_13657_1	EbdA	3.3e-32	108.4	0.7	3.9e-14	48.6	0	4.1	3	1	1	4	4	4	4	1
		CH_149-scaffold_3700_12	MAH_alpha	0.015	11.4	0	0.018	11.1	0	1.2	1	0	0	1	1	1	0	0
		CH_149-scaffold_1134_1	NmsA	7.6e-77	256.3	0	9.9e-77	255.9	0	1	1	0	0	1	1	1	1	1
		CH_149-scaffold_4271_2	non_NdoB_type	0.0055	13.3	0	0.039	10.4	0	1.8	2	0	0	2	2	2	1	0
		CH_149-scaffold_3852_1	sBmoZ	0.014	12.7	0.1	0.033	11.5	0.1	1.5	1	0	0	1	1	1	0	0
		CH_149-scaffold_2625_9	TmoA_BmoA	0.00018	17.8	0.1	0.0013	15	0	1.9	2	0	0	2	2	2	1	0
		CH_149-scaffold_19329_2	TomA3	2.6e-05	20.3	0.1	2.9e-05	20.1	0.1	1.1	1	0	0	1	1	1	1	1
		CH_149-scaffold_2398_13	TomA3	0.033	10	0	0.034	10	0	1	1	0	0	1	1	1	0	0
CH_155	Halobacterota	CH_155-scaffold_32294_3	AbcA_1	4.3e-09	32.5	0.1	1.6e-08	30.6	0.1	1.9	1	1	0	1	1	1	1	1
		CH_155-scaffold_32294_3	AbcA_2	2.4e-44	148.6	0.4	2.2e-42	142.2	0.4	2.1	2	0	0	2	2	2	2	1
		CH_155-scaffold_31259_6	AhyA	7.9e-07	24.6	0	9e-07	24.4	0	1	1	0	0	1	1	1	1	1
		CH_155-scaffold_59879_1	AhyA	0.0019	13.4	0	0.0075	11.4	0	1.9	2	1	0	2	2	2	1	0
		CH_155-scaffold_77316_5	AlmA_GroupI	0.00033	16.4	0	0.078	8.6	0	2.3	2	1	0	2	2	2	2	0
		CH_155-scaffold_18259_14	AlmA_GroupI	0.024	10.3	0	0.039	9.6	0	1.2	1	0	0	1	1	1	0	0
		CH_155-scaffold_59879_1	EbdA	0.0052	11.5	0.1	0.15	6.7	0.1	2.4	2	1	1	3	3	3	3	0
		CH_155-scaffold_32294_3	K27540	1.4e-23	80.5	0.3	1.8e-23	80.2	0.3	1.1	1	0	0	1	1	1	1	1
		CH_155-scaffold_24431_12	LadA_alpha	0.00025	16.8	0	0.0019	13.9	0	1.9	2	0	0	2	2	2	2	0
		CH_155-scaffold_24431_12	LadA_beta	0.021	10.7	0.3	0.91	5.3	0.1	2.1	2	0	0	2	2	2	0	0
		CH_155-scaffold_24431_12	LadB	1.9e-11	40.5	0.1	5.8e-11	38.9	0	1.6	2	0	0	2	2	2	1	1
		CH_155-scaffold_7423_5	pBmoB	0.0091	12	0.1	0.013	11.5	0.1	1.1	1	0	0	1	1	1	1	0
		CH_155-scaffold_17085_2	TmoA_BmoA	4e-05	19.7	0	4e-05	19.7	0	1	1	0	0	1	1	1	1	1
		CH_155-scaffold_17085_2	TomA3	2.6e-06	23.3	0.4	2.6e-06	23.3	0.4	1	1	0	0	1	1	1	1	1
CH_159	Halobacterota	CH_159-scaffold_39493_3	AbcA_1	8e-09	31.6	0.3	2.1e-08	30.3	0.3	1.6	1	1	0	1	1	1	1	1
		CH_159-scaffold_39493_3	AbcA_2	3.6e-42	141.4	0.8	2.2e-41	138.9	0.5	1.9	2	0	0	2	2	2	2	1
		CH_159-scaffold_5394_14	AhyA	0.016	10.2	0	0.02	10	0	1	1	0	0	1	1	1	0	0
		CH_159-scaffold_9368_13	AlkB	1.4e-05	21.2	0	1.4e-05	21.2	0	1	1	0	0	1	1	1	1	1
		CH_159-scaffold_16216_4	AlkB	0.005	12.8	4.3	0.0057	12.6	4.3	1.1	1	0	0	1	1	1	1	0
		CH_159-scaffold_39365_3	AlmA_GroupI	0.00015	17.5	0	0.00024	16.8	0	1.2	1	0	0	1	1	1	1	0
		CH_159-scaffold_1354_21	AlmA_GroupI	0.0026	13.5	0	0.28	6.7	0	2.3	2	0	0	2	2	2	2	0
		CH_159-scaffold_4525_14	AlmA_GroupI	0.005	12.5	0	0.0081	11.8	0	1.2	1	0	0	1	1	1	1	0
		CH_159-scaffold_39365_3	AlmA_GroupIII	1.7e-05	20.7	0	2.4e-05	20.2	0	1.2	1	0	0	1	1	1	1	1
		CH_159-scaffold_4525_14	AlmA_GroupIII	0.015	11	0	0.024	10.3	0	1.2	1	0	0	1	1	1	0	0
		CH_159-scaffold_8572_1	BssA	0.017	9.9	0.7	0.018	9.9	0.7	1	1	0	0	1	1	1	0	0
		CH_159-scaffold_39493_3	K27540	4.8e-25	85.3	0.4	5.9e-25	85	0.4	1	1	0	0	1	1	1	1	1
		CH_159-scaffold_11616_12	LadA_alpha	0.03	9.9	0	0.038	9.5	0	1.1	1	0	0	1	1	1	0	0
		CH_159-scaffold_11616_12	LadB	0.00058	15.8	0	0.006	12.4	0	1.9	2	0	0	2	2	2	2	0
		CH_159-scaffold_5449_4	TmoA_BmoA	6.4e-05	19	0	6.4e-05	19	0	1	1	0	0	1	1	1	1	1
		CH_159-scaffold_5449_4	TomA3	3.4e-06	22.8	0.6	3.4e-06	22.8	0.6	1	1	0	0	1	1	1	1	1
CH_160	Thermoplasmatota	CH_160-scaffold_94230_2	AbcA_2	0.0089	10.3	0	0.012	9.9	0	1.1	1	0	0	1	1	1	1	0
		CH_160-scaffold_62247_4	AlkB	0.013	10.2	0.1	0.024	9.3	0.1	1.4	1	0	0	1	1	1	0	0
		CH_160-scaffold_13320_6	AlkB	0.016	9.8	4	0.007	11.1	1.5	1.6	2	0	0	2	2	2	0	0
		CH_160-scaffold_50790_4	AlkB	0.94	4	9.2	1.8	3.1	9.2	1.4	1	0	0	1	1	1	0	0
		CH_160-scaffold_52727_1	AlmA_GroupI	0.00071	14.1	0.2	0.0069	10.8	0	1.9	2	0	0	2	2	2	2	0
		CH_160-scaffold_65980_2	DszC	1.3e-18	62.7	0.1	1.8e-18	62.2	0.1	1.1	1	0	0	1	1	1	1	1
		CH_160-scaffold_53037_4	DszC	1.6e-17	59.1	0.2	1.2e-16	56.3	0.2	1.9	1	1	0	1	1	1	1	1
CH_165_sub	Acidobacteriota	CH_165_sub-scaffold_8455_5	AhyA	0.00094	14.4	0	0.47	5.5	0	2.9	3	0	0	3	3	3	3	0
		CH_165_sub-scaffold_4632_1	AlkB	0.08	8.8	4.8	0.62	5.9	2.5	2	2	0	0	2	2	2	0	0
		CH_165_sub-scaffold_5112_9	AlmA_GroupI	0.00047	16	0.3	0.058	9.1	0	2.1	1	1	0	2	2	2	2	0
		CH_165_sub-scaffold_22462_5	AlmA_GroupI	0.00052	15.8	0	0.02	10.6	0	2.2	2	0	0	2	2	2	2	0
		CH_165_sub-scaffold_12000_5	AlmA_GroupI	0.0014	14.4	1.8	0.49	6	0	3.4	4	0	0	4	4	4	2	0
		CH_165_sub-scaffold_22462_5	AlmA_GroupIII	0.00023	17	0.1	0.15	7.8	0	2.3	2	0	0	2	2	2	2	0
		CH_165_sub-scaffold_5112_9	AlmA_GroupIII	0.0028	13.4	0	0.0054	12.5	0	1.5	1	1	0	1	1	1	1	0
		CH_165_sub-scaffold_2045_4	AlmA_GroupIII	0.01	11.6	0.1	0.034	9.9	0	1.8	2	0	0	2	2	2	0	0
		CH_165_sub-scaffold_4966_9	AssA	4.5e-129	428.8	0	6.1e-129	428.4	0	1	1	0	0	1	1	1	1	1
		CH_165_sub-scaffold_4966_9	BssA	9.8e-122	404.5	0	1.4e-121	403.9	0	1.2	1	0	0	1	1	1	1	1
		CH_165_sub-scaffold_9030_5	DszC	1.2e-19	67.4	0.1	3e-18	62.8	0.1	2.1	1	1	0	1	1	1	1	1
		CH_165_sub-scaffold_8486_9	DszC	1.9e-10	37.1	0.1	1.5e-09	34.1	0.1	2	1	1	0	1	1	1	1	1
		CH_165_sub-scaffold_2034_17	DszC	8.6e-07	25	0	2.2e-06	23.7	0	1.7	1	1	0	1	1	1	1	1
		CH_165_sub-scaffold_8455_5	EbdA	3.2e-07	25.4	0	0.015	10	0	3.1	3	0	0	3	3	3	3	1
		CH_165_sub-scaffold_4966_9	NmsA	3.7e-112	372.8	0	4.6e-112	372.5	0	1	1	0	0	1	1	1	1	1
CH_166	Desulfobacterota	CH_166-scaffold_13732_7	AbcA_1	1e-55	186.7	0	1.4e-55	186.2	0	1.1	1	0	0	1	1	1	1	1
		CH_166-scaffold_18982_3	AbcA_1	0.021	10.8	0.1	0.031	10.2	0.1	1.1	1	0	0	1	1	1	0	0
		CH_166-scaffold_13732_7	AbcA_2	3.3e-28	95.7	0.1	6.8e-28	94.7	0.1	1.4	1	0	0	1	1	1	1	1
		CH_166-scaffold_9962_4	AhyA	3.1e-24	82.5	1.6	1.1e-14	50.9	0	4.1	3	1	1	4	4	4	2	1
		CH_166-scaffold_13126_2	AhyA	5e-20	68.6	0	5.1e-09	32.1	0	3.9	3	1	1	4	4	4	3	1
		CH_166-scaffold_3279_8	AhyA	1.3e-18	63.9	0	2.6e-06	23.2	0	4.9	5	0	0	5	5	5	4	1
		CH_166-scaffold_800_6	AhyA	1.4e-17	60.4	0.2	2.6e-06	23.2	0	4	3	1	1	4	4	4	4	1
		CH_166-scaffold_800_7	AhyA	0.0037	12.7	0	0.0037	12.7	0	1	1	0	0	1	1	1	1	0
		CH_166-scaffold_13126_1	AhyA	0.026	9.9	0	0.033	9.6	0	1.1	1	0	0	1	1	1	0	0
		CH_166-scaffold_2520_22	AlkB	8.3e-05	19	0	8.3e-05	19	0	1	1	0	0	1	1	1	1	1
		CH_166-scaffold_528_53	AlkB	0.0019	14.5	0	0.0019	14.5	0	1	1	0	0	1	1	1	1	0
		CH_166-scaffold_1384_5	AlkB	0.014	11.6	0.5	0.02	11.1	0.5	1.2	1	0	0	1	1	1	0	0
		CH_166-scaffold_495_6	AlkB	1.9	4.6	5.7	0.28	7.3	0.2	2	2	0	0	2	2	2	0	0
		CH_166-scaffold_483_18	AlmA_GroupI	0.002	14.2	0	0.029	10.4	0	2.1	2	0	0	2	2	2	1	0
		CH_166-scaffold_44268_4	AlmA_GroupI	0.0051	12.8	0	0.0071	12.4	0	1.2	1	0	0	1	1	1	1	0
		CH_166-scaffold_593_10	AlmA_GroupI	0.017	11.1	0	0.018	11	0	1	1	0	0	1	1	1	0	0
		CH_166-scaffold_1896_12	AlmA_GroupI	0.018	11	0	0.026	10.5	0	1.2	1	0	0	1	1	1	0	0
		CH_166-scaffold_251_3	AlmA_GroupI	0.029	10.3	0	0.029	10.3	0	1	1	0	0	1	1	1	0	0
		CH_166-scaffold_640_17	AlmA_GroupI	0.042	9.8	1	2.6	3.9	0	2.8	3	0	0	3	3	3	0	0
		CH_166-scaffold_4111_5	AlmA_GroupIII	0.00023	17.3	0.1	0.00055	16.1	0.1	1.6	2	0	0	2	2	2	1	0
		CH_166-scaffold_44268_4	AlmA_GroupIII	0.0038	13.3	0	0.0058	12.7	0	1.2	1	0	0	1	1	1	1	0
		CH_166-scaffold_1627_30	AlmA_GroupIII	0.0087	12.1	0	0.013	11.6	0	1.1	1	0	0	1	1	1	1	0
		CH_166-scaffold_640_17	AlmA_GroupIII	0.015	11.4	0.8	0.36	6.8	0.1	2.8	3	0	0	3	3	3	0	0
		CH_166-scaffold_9962_4	CmdA	5.2e-14	48.5	1.2	3.8e-09	32.4	0	3.1	3	0	0	3	3	3	2	1
		CH_166-scaffold_13126_2	CmdA	8.6e-09	31.2	0	0.00013	17.4	0	3	3	0	0	3	3	3	2	1
		CH_166-scaffold_3279_8	CmdA	3e-06	22.8	0	1.7e-05	20.3	0	2.1	2	1	0	2	2	2	1	1
		CH_166-scaffold_800_6	CmdA	0.0022	13.3	0	0.46	5.6	0	3	3	0	0	3	3	3	2	0
		CH_166-scaffold_8789_8	DszC	9.1e-20	68.1	0.5	1.6e-18	63.9	0.5	2	1	1	0	1	1	1	1	1
		CH_166-scaffold_3022_7	DszC	2.6e-18	63.3	0.7	2.8e-16	56.6	0.7	2	1	1	0	1	1	1	1	1
		CH_166-scaffold_1627_3	DszC	4.5e-11	39.4	0.1	1.7e-10	37.5	0.1	1.8	1	1	0	1	1	1	1	1
		CH_166-scaffold_8789_2	DszC	2.8e-10	36.8	0.4	2.1e-09	33.9	0.4	1.9	1	1	0	1	1	1	1	1
		CH_166-scaffold_495_13	DszC	7.2e-07	25.6	0	1.3e-06	24.8	0	1.5	1	1	0	1	1	1	1	1
		CH_166-scaffold_529_17	DszC	2.5e-06	23.8	0	3.5e-06	23.3	0	1.2	1	0	0	1	1	1	1	1
		CH_166-scaffold_22_43	DszC	0.00054	16.1	0	0.0012	14.9	0	1.5	2	0	0	2	2	2	1	0
		CH_166-scaffold_13126_2	EbdA	4.2e-21	71.7	0	4.9e-09	31.7	0	4	2	1	1	4	4	4	4	1
		CH_166-scaffold_9962_4	EbdA	7.2e-21	70.9	1.9	1.8e-07	26.5	0	4.8	5	0	0	5	5	5	4	1
		CH_166-scaffold_800_6	EbdA	5.1e-14	48.2	0	7.8e-05	17.8	0	4	3	1	1	4	4	4	4	1
		CH_166-scaffold_3279_8	EbdA	1.5e-13	46.7	0.1	2.4e-05	19.5	0	4.6	5	0	0	5	5	5	3	1
		CH_166-scaffold_13732_7	K27540	4.5e-80	267.1	0.3	1.7e-79	265.2	0.3	1.7	1	1	0	1	1	1	1	1
		CH_166-scaffold_1341_11	NmsA	0.041	9.1	0.1	0.059	8.6	0.1	1.1	1	0	0	1	1	1	0	0
CH_172	Bacteroidota	CH_172-scaffold_175_19	AbcA_1	2.8e-36	122.2	0	1.9e-35	119.5	0	2.1	1	1	0	2	2	2	1	1
		CH_172-scaffold_175_19	AbcA_2	1.1e-149	496.1	1.1	2.8e-142	471.6	0	2.4	1	1	1	2	2	2	2	1
		CH_172-scaffold_40299_2	AlkB	3.5	3.4	17.6	5.9	2.7	17.6	1.4	1	0	0	1	1	1	0	0
		CH_172-scaffold_854_26	AlmA_GroupI	0.019	10.6	0.1	0.19	7.4	0	2.3	2	1	1	3	3	3	0	0
		CH_172-scaffold_585_14	AlmA_GroupI	0.024	10.3	0	0.033	9.9	0	1.1	1	0	0	1	1	1	0	0
		CH_172-scaffold_836_15	AssA	1.9e-45	152.2	0	2.4e-45	151.9	0	1	1	0	0	1	1	1	1	1
		CH_172-scaffold_836_14	AssA	2e-13	46.3	0	2.1e-13	46.2	0	1	1	0	0	1	1	1	1	1
		CH_172-scaffold_836_15	BssA	9.3e-41	136.6	0	1.1e-40	136.3	0	1	1	0	0	1	1	1	1	1
		CH_172-scaffold_836_14	BssA	7.8e-14	47.5	0	8.5e-14	47.4	0	1	1	0	0	1	1	1	1	1
		CH_172-scaffold_355_32	DszC	5.3e-10	35.6	0	7.9e-10	35	0	1.1	1	0	0	1	1	1	1	1
		CH_172-scaffold_175_19	K27540	2.2e-52	175.5	0.3	1.9e-51	172.4	0	2.3	2	1	0	2	2	2	1	1
		CH_172-scaffold_836_15	NmsA	1e-36	123.2	0	1.3e-36	122.9	0	1	1	0	0	1	1	1	1	1
		CH_172-scaffold_836_14	NmsA	2.9e-15	52.3	0	3.2e-15	52.1	0	1	1	0	0	1	1	1	1	1
		CH_172-scaffold_566_35	TmoE	0.0017	14.7	0	0.0037	13.6	0	1.4	1	0	0	1	1	1	1	0
CH_173	Krumholzibacteriota	CH_173-scaffold_256_32	AhyA	0.0017	13.7	0	0.43	5.7	0	3.1	4	0	0	4	4	4	3	0
		CH_173-scaffold_222_56	AlkB	2.1e-05	20.8	0	2.1e-05	20.8	0	1	1	0	0	1	1	1	1	1
		CH_173-scaffold_671_5	AlmA_GroupI	0.00028	16.8	0.7	0.22	7.3	0	3.2	4	0	0	4	4	4	2	0
		CH_173-scaffold_726_6	AlmA_GroupI	0.0047	12.8	0.2	0.74	5.5	0	2.4	3	0	0	3	3	3	2	0
		CH_173-scaffold_671_5	AlmA_GroupIII	0.00099	15.1	1.7	0.15	7.9	0.2	2.9	2	1	1	3	3	3	2	0
		CH_173-scaffold_1554_13	AssA	3.5e-128	426	0	4.4e-128	425.7	0	1	1	0	0	1	1	1	1	1
		CH_173-scaffold_1554_13	BssA	3.6e-117	389.5	0	4.8e-117	389.1	0	1.1	1	0	0	1	1	1	1	1
		CH_173-scaffold_212_38	DszC	1.1e-16	57.8	2.1	2.1e-14	50.2	0.6	2.1	1	1	1	2	2	2	2	1
		CH_173-scaffold_1070_1	DszC	8.2e-14	48.3	0.3	2.1e-13	46.9	0.3	1.7	1	1	0	1	1	1	1	1
		CH_173-scaffold_2662_12	DszC	9e-13	44.9	0	2.1e-12	43.6	0	1.5	2	0	0	2	2	2	1	1
		CH_173-scaffold_726_23	DszC	2e-12	43.7	0	5.1e-12	42.4	0	1.6	2	0	0	2	2	2	1	1
		CH_173-scaffold_1554_13	NmsA	1.4e-111	371	0	1.7e-111	370.7	0	1	1	0	0	1	1	1	1	1
		CH_173-scaffold_304_27	TmoA_BmoA	0.002	14.3	0.2	0.025	10.6	0.1	2	1	1	1	2	2	2	2	0
		CH_173-scaffold_304_27	TomA3	9.4e-06	21.6	4.5	0.004	12.9	0.3	2.1	1	1	1	2	2	2	2	1
CH_174_sub	Acidobacteriota	CH_174_sub-scaffold_1517_15	AhyA	3e-31	105.2	0.1	3.6e-13	45.4	0	4	3	1	1	4	4	4	4	1
		CH_174_sub-scaffold_23680_4	AhyA	0.012	10.5	0	0.012	10.5	0	1	1	0	0	1	1	1	0	0
		CH_174_sub-scaffold_1804_5	AlkB	6.3e-07	25.5	0	7.5e-07	25.2	0	1.1	1	0	0	1	1	1	1	1
		CH_174_sub-scaffold_292_21	AlmA_GroupI	0.0088	11.6	0.1	1.1	4.7	0	2.2	2	0	0	2	2	2	2	0
		CH_174_sub-scaffold_1547_13	AlmA_GroupI	0.013	11	0.1	0.49	5.8	0	2.7	1	1	2	3	3	3	0	0
		CH_174_sub-scaffold_296_51	AlmA_GroupIII	0.00095	14.8	0	0.0019	13.8	0	1.5	1	0	0	1	1	1	1	0
		CH_174_sub-scaffold_15_15	AssA	1e-139	463.9	0	1.3e-139	463.5	0	1	1	0	0	1	1	1	1	1
		CH_174_sub-scaffold_15_15	BssA	4.5e-124	412	0	5.5e-124	411.7	0	1	1	0	0	1	1	1	1	1
		CH_174_sub-scaffold_1517_15	CmdA	3.2e-10	35.4	0	0.0037	12.1	0	3.9	3	1	1	4	4	4	4	1
		CH_174_sub-scaffold_292_18	DszC	7.6e-12	41.5	0	3.8e-11	39.2	0	1.9	1	1	0	1	1	1	1	1
		CH_174_sub-scaffold_30_28	DszC	4.3e-09	32.4	0	6.5e-09	31.8	0	1.2	1	0	0	1	1	1	1	1
		CH_174_sub-scaffold_1517_15	EbdA	4.8e-27	90.8	0.1	3.2e-09	31.9	0	4	3	1	1	4	4	4	4	1
		CH_174_sub-scaffold_2223_22	LadB	0.0027	13.5	0	0.17	7.6	0	2	2	0	0	2	2	2	2	0
		CH_174_sub-scaffold_15_15	NmsA	4.4e-115	382.3	0.1	6.2e-115	381.8	0.1	1	1	0	0	1	1	1	1	1
CH_175	Unknown Novel Bacterium	CH_175-scaffold_847_13	AlkB	0.00013	17.9	0	0.00014	17.8	0	1	1	0	0	1	1	1	1	0
		CH_175-scaffold_882_13	AlmA_GroupI	0.0018	13.8	0	0.028	9.9	0	2	1	1	1	2	2	2	2	0
		CH_175-scaffold_68_67	AlmA_GroupI	0.0025	13.4	0	0.004	12.7	0	1.2	1	0	0	1	1	1	1	0
		CH_175-scaffold_631_10	AlmA_GroupI	0.0035	12.9	0	0.0049	12.4	0	1.2	1	0	0	1	1	1	1	0
		CH_175-scaffold_3372_13	AlmA_GroupIII	0.0041	12.7	0.1	0.072	8.6	0	2.1	2	0	0	2	2	2	2	0
		CH_175-scaffold_523_14	DszC	1.1e-12	44.3	0.1	1.2e-11	40.9	0.1	2.1	1	1	0	1	1	1	1	1
CH_178	Bacteroidota	CH_178-scaffold_163_19	AhyA	4.7e-59	197.6	0.8	1.8e-42	142.7	0.1	4	4	0	0	4	4	4	4	1
		CH_178-scaffold_21_74	AhyA	1e-30	103.8	0.1	1.8e-17	60	0	3.8	3	1	1	4	4	4	3	1
		CH_178-scaffold_99_29	AlkB	1.1e-05	21.7	0	1.2e-05	21.7	0	1	1	0	0	1	1	1	1	1
		CH_178-scaffold_198_41	AlkB	0.16	8	6.2	0.0088	12.2	0.3	1.7	2	0	0	2	2	2	0	0
		CH_178-scaffold_813_43	AlmA_GroupI	0.0047	12.8	0	0.7	5.6	0	2.9	3	0	0	3	3	3	2	0
		CH_178-scaffold_1076_31	AssA	7.5e-123	408.4	0	9.8e-123	408	0	1	1	0	0	1	1	1	1	1
		CH_178-scaffold_1076_31	BssA	8.2e-111	368.5	0	1.5e-110	367.6	0	1.3	1	1	0	1	1	1	1	1
		CH_178-scaffold_163_19	CmdA	7.1e-30	100.8	0.1	7.9e-25	84.1	0.1	3.9	4	0	0	4	4	4	4	1
		CH_178-scaffold_21_74	CmdA	1.1e-13	47.3	0	1.1e-08	30.7	0.1	3.9	2	1	1	3	3	3	3	1
		CH_178-scaffold_160_23	DszC	8.1e-10	35.1	0	1.2e-09	34.6	0	1.1	1	0	0	1	1	1	1	1
		CH_178-scaffold_163_19	EbdA	2.4e-40	135.2	0.1	2.2e-25	85.7	0	4	4	0	0	4	4	4	4	1
		CH_178-scaffold_21_74	EbdA	7.6e-22	74	0	1.1e-12	43.7	0	3.6	3	1	1	4	4	4	3	1
		CH_178-scaffold_21_75	MAH_alpha	0.0023	14	0	0.0025	13.8	0	1.2	1	0	0	1	1	1	1	0
		CH_178-scaffold_21_75	NdoB	3e-05	20.2	0	3.5e-05	20	0	1.1	1	0	0	1	1	1	1	1
		CH_178-scaffold_1076_31	NmsA	7e-101	335.6	0	9.8e-101	335.2	0	1.1	1	0	0	1	1	1	1	1
		CH_178-scaffold_21_75	non_NdoB_type	0.00042	16.8	0	0.00054	16.4	0	1.1	1	0	0	1	1	1	1	0
CH_179	Desulfobacterota	CH_179-scaffold_11130_1	AbcA_1	9.3e-17	58	0	6.4e-16	55.2	0	1.9	1	1	0	1	1	1	1	1
		CH_179-scaffold_11130_1	AbcA_2	5.6e-70	233.3	0	6.8e-70	233	0	1	1	0	0	1	1	1	1	1
		CH_179-scaffold_6659_3	AhyA	1.6e-53	179.2	0.2	3.3e-44	148.4	0	3	3	0	0	3	3	3	3	1
		CH_179-scaffold_2086_4	AhyA	4.1e-27	91.8	0.1	1.3e-08	30.7	0	4	3	1	1	4	4	4	4	1
		CH_179-scaffold_2086_17	AhyA	8.7e-26	87.5	0.9	9.1e-08	27.8	0	4	3	1	1	4	4	4	4	1
		CH_179-scaffold_7173_5	AhyA	1e-23	80.6	0.8	9.2e-13	44.3	0	3.1	2	1	1	3	3	3	3	1
		CH_179-scaffold_5383_5	AhyA	1.1e-22	77.2	0.2	1.1e-08	30.9	0	4	3	1	1	4	4	4	4	1
		CH_179-scaffold_5066_8	AhyA	3.1e-21	72.4	1	9.4e-19	64.2	0.2	2.4	2	1	0	2	2	2	2	1
		CH_179-scaffold_8316_1	AhyA	3.8e-19	65.5	0	7e-18	61.3	0	2.2	1	1	1	2	2	2	1	1
		CH_179-scaffold_6168_11	AhyA	9.3e-18	60.9	0.1	3.1e-08	29.3	0	3.4	3	1	1	4	4	4	3	1
		CH_179-scaffold_10161_9	AhyA	2.9e-17	59.3	0.6	4.9e-15	51.9	0.7	2.9	2	1	0	2	2	2	1	1
		CH_179-scaffold_10161_8	AhyA	8.7e-05	17.9	0.1	0.0001	17.7	0.1	1.1	1	0	0	1	1	1	1	1
		CH_179-scaffold_2086_16	AhyA	0.00019	16.8	0	0.0002	16.7	0	1	1	0	0	1	1	1	1	0
		CH_179-scaffold_2086_3	AhyA	0.0006	15.2	0	0.00079	14.8	0	1.1	1	0	0	1	1	1	1	0
		CH_179-scaffold_5383_4	AhyA	0.00068	15	0	0.00068	15	0	1	1	0	0	1	1	1	1	0
		CH_179-scaffold_21012_5	AlkB	0.00085	15.5	0	0.00085	15.5	0	1	1	0	0	1	1	1	1	0
		CH_179-scaffold_3402_11	AlmA_GroupI	0.00014	17.8	0	0.0087	11.9	0	2.1	2	0	0	2	2	2	2	0
		CH_179-scaffold_1089_9	AlmA_GroupI	0.0024	13.8	0	0.0033	13.3	0	1.1	1	0	0	1	1	1	1	0
		CH_179-scaffold_14848_6	AlmA_GroupI	0.0051	12.6	0.2	0.49	6.1	0	2.7	3	0	0	3	3	3	1	0
		CH_179-scaffold_6009_9	AlmA_GroupI	0.009	11.8	0.1	0.01	11.7	0.1	1.1	1	0	0	1	1	1	1	0
		CH_179-scaffold_37656_2	AlmA_GroupI	0.012	11.4	0	0.019	10.7	0	1.2	1	0	0	1	1	1	0	0
		CH_179-scaffold_49305_6	AlmA_GroupI	0.014	11.2	0	0.014	11.2	0	1	1	0	0	1	1	1	0	0
		CH_179-scaffold_2524_9	AlmA_GroupI	0.021	10.6	0.1	1.2	4.8	0	2.1	2	0	0	2	2	2	0	0
		CH_179-scaffold_1089_14	AlmA_GroupI	0.026	10.3	0	0.027	10.3	0	1	1	0	0	1	1	1	0	0
		CH_179-scaffold_3402_11	AlmA_GroupIII	0.0031	13.4	0	0.023	10.5	0	2	2	0	0	2	2	2	1	0
		CH_179-scaffold_37656_2	AlmA_GroupIII	0.005	12.7	0	0.0069	12.3	0	1.2	1	0	0	1	1	1	1	0
		CH_179-scaffold_15886_5	AlmA_GroupIII	0.018	10.9	0.3	0.017	11	0.3	1	1	0	0	1	1	1	0	0
		CH_179-scaffold_49305_6	AlmA_GroupIII	0.027	10.3	0	0.027	10.3	0	1	1	0	0	1	1	1	0	0
		CH_179-scaffold_13199_6	AssA	8.5e-128	424.7	0	1.1e-127	424.3	0	1	1	0	0	1	1	1	1	1
		CH_179-scaffold_5476_13	AssA	1e-84	282.2	0	1.5e-84	281.7	0	1.2	1	0	0	1	1	1	1	1
		CH_179-scaffold_13199_6	BssA	1.4e-111	371	0	1.8e-111	370.6	0	1	1	0	0	1	1	1	1	1
		CH_179-scaffold_5476_13	BssA	3.7e-83	277	0	9.8e-83	275.6	0	1.6	1	1	0	1	1	1	1	1
		CH_179-scaffold_6659_3	CmdA	4.8e-34	114.6	1.1	3.4e-25	85.3	0.1	3.4	3	1	0	3	3	3	3	1
		CH_179-scaffold_5066_8	CmdA	6.5e-17	57.9	0	9.5e-17	57.3	0	1.2	1	0	0	1	1	1	1	1
		CH_179-scaffold_10161_9	CmdA	1e-16	57.3	0.7	1.6e-13	46.7	1.2	2.9	2	1	0	2	2	2	2	1
		CH_179-scaffold_8316_1	CmdA	2.2e-12	42.9	0	1.1e-09	33.9	0	2.3	2	0	0	2	2	2	2	1
		CH_179-scaffold_2086_17	CmdA	1e-09	34.1	0.3	0.0013	13.8	0.1	3.1	2	1	1	3	3	3	3	1
		CH_179-scaffold_2086_4	CmdA	2.1e-09	33.1	0	0.00064	14.9	0	3.9	3	1	1	4	4	4	3	1
		CH_179-scaffold_6168_11	CmdA	2.8e-08	29.3	0	1.8e-07	26.7	0	2.2	2	1	1	3	3	3	1	1
		CH_179-scaffold_7173_5	CmdA	3.3e-08	29.1	3.1	0.00079	14.6	0.2	3.2	2	1	1	3	3	3	3	1
		CH_179-scaffold_5383_5	CmdA	3.5e-05	19.1	0.1	0.0041	12.2	0	3.3	3	1	1	4	4	4	1	1
		CH_179-scaffold_3008_20	DszC	4.6e-21	72.1	0.2	8.8e-20	67.9	0.2	2	1	1	0	1	1	1	1	1
		CH_179-scaffold_5386_8	DszC	4e-14	49.3	0.2	5.4e-12	42.3	0.1	2	1	1	1	2	2	2	2	1
		CH_179-scaffold_5586_8	DszC	4.2e-06	22.9	0	2e-05	20.6	0.1	1.8	2	0	0	2	2	2	1	1
		CH_179-scaffold_13199_4	DszC	0.00023	17.2	0.1	0.0017	14.2	0.1	2.3	3	0	0	3	3	3	1	0
		CH_179-scaffold_20822_1	DszC	0.00083	15.3	0	0.02	10.8	0	2.4	2	1	0	2	2	2	1	0
		CH_179-scaffold_1511_1	DszC	0.0093	11.8	0	0.014	11.3	0	1.2	1	0	0	1	1	1	1	0
		CH_179-scaffold_6659_3	EbdA	4e-41	137.8	0	4.8e-35	117.6	0	3.3	3	1	0	3	3	3	3	1
		CH_179-scaffold_2086_17	EbdA	1.7e-22	76.1	0.1	9.8e-09	30.6	0	3.5	3	1	1	4	4	4	3	1
		CH_179-scaffold_2086_4	EbdA	1e-21	73.6	0.1	1e-07	27.2	0	4	3	1	1	4	4	4	4	1
		CH_179-scaffold_10161_9	EbdA	1.9e-16	56.1	0.4	5.1e-16	54.7	0.4	1.6	1	1	0	1	1	1	1	1
		CH_179-scaffold_5383_5	EbdA	5.6e-16	54.5	0.2	1e-05	20.5	0	4	3	1	1	4	4	4	4	1
		CH_179-scaffold_6168_11	EbdA	1.1e-15	53.5	0	1.6e-07	26.6	0	3	1	1	2	3	3	3	2	1
		CH_179-scaffold_8316_1	EbdA	2.5e-14	49	0	3e-09	32.2	0	2.8	3	0	0	3	3	3	2	1
		CH_179-scaffold_5066_8	EbdA	3.2e-14	48.7	0.2	9.2e-12	40.6	0	3.3	3	1	0	3	3	3	2	1
		CH_179-scaffold_7173_5	EbdA	4.1e-14	48.4	0.3	9.9e-06	20.6	0	3.1	2	1	1	3	3	3	3	1
		CH_179-scaffold_2086_16	EbdA	0.0013	13.6	0	0.0014	13.5	0	1	1	0	0	1	1	1	1	0
		CH_179-scaffold_5383_4	EbdA	0.014	10.2	0	0.016	10	0	1	1	0	0	1	1	1	0	0
		CH_179-scaffold_11130_1	K27540	1.6e-26	90.4	0	5e-17	59.1	0	2	2	0	0	2	2	2	2	1
		CH_179-scaffold_44543_2	K27540	0.02	10.9	0	0.036	10.1	0	1.3	1	0	0	1	1	1	0	0
		CH_179-scaffold_13199_6	NmsA	1.9e-101	337.5	0	4.2e-101	336.3	0	1.4	1	1	0	1	1	1	1	1
		CH_179-scaffold_5476_13	NmsA	7.7e-82	272.6	0	1.1e-81	272.1	0	1.1	1	0	0	1	1	1	1	1
CH_180	Calditrichota	CH_180-scaffold_735_17	AhyA	1.4e-12	43.9	3.1	1.1e-09	34.4	0.6	3.5	3	1	0	3	3	3	2	1
		CH_180-scaffold_735_18	AhyA	2.7e-06	23.1	0.3	7.3e-05	18.4	0.3	2	1	1	0	1	1	1	1	1
		CH_180-scaffold_970_9	AhyA	0.00016	17.3	0.1	0.021	10.3	0	2.1	2	0	0	2	2	2	2	0
		CH_180-scaffold_10166_2	AlkB	1e-05	22.1	0	1e-05	22.1	0	1	1	0	0	1	1	1	1	1
		CH_180-scaffold_9765_5	AlmA_GroupI	0.00012	18.2	0	0.01	11.9	0	2.4	2	1	0	2	2	2	2	0
		CH_180-scaffold_2174_7	AlmA_GroupI	0.00017	17.8	0.5	0.65	5.9	0	3.2	3	0	0	3	3	3	3	0
		CH_180-scaffold_1597_7	AlmA_GroupI	0.027	10.5	0	0.055	9.5	0	1.5	1	0	0	1	1	1	0	0
		CH_180-scaffold_9765_5	AlmA_GroupIII	0.045	9.8	0.3	0.65	6	0	2.3	2	1	0	2	2	2	0	0
		CH_180-scaffold_735_17	CmdA	4.1e-08	29	0.8	2.4e-05	19.8	0.1	2.8	3	0	0	3	3	3	3	1
		CH_180-scaffold_1851_9	DszC	6.5e-16	55.4	0	9e-15	51.7	0	2	1	1	0	1	1	1	1	1
		CH_180-scaffold_22583_1	DszC	3.3e-10	36.6	0	4e-10	36.4	0	1.1	1	0	0	1	1	1	1	1
		CH_180-scaffold_735_17	EbdA	2.1e-14	49.5	0.5	1.1e-12	43.8	0.2	3.1	3	1	0	3	3	3	3	1
		CH_180-scaffold_3696_8	TmoA_BmoA	0.012	11.9	0	0.013	11.7	0	1	1	0	0	1	1	1	0	0
		CH_180-scaffold_3696_8	TomA3	0.0027	13.7	0.1	0.0028	13.6	0.1	1.1	1	0	0	1	1	1	1	0
CH_197	Asgardarchaeota	CH_197-scaffold_26971_5	AbcA_1	1.9e-07	27.1	0	2.2e-07	27	0	1	1	0	0	1	1	1	1	1
		CH_197-scaffold_26971_5	AbcA_2	2.2e-12	43.3	0.1	1.5e-09	33.9	0.1	2	1	1	0	1	1	1	1	1
		CH_197-scaffold_16010_2	AhyA	5.1e-79	263.6	0	1.6e-53	179.2	0	3	3	0	0	3	3	3	3	1
		CH_197-scaffold_51486_5	AhyA	1.5e-20	70	0.2	5.6e-10	35.1	0	3	2	1	1	3	3	3	3	1
		CH_197-scaffold_35565_11	AlkB	0.31	7	3.6	0.046	9.7	0.1	1.3	2	0	0	2	2	2	0	0
		CH_197-scaffold_21639_4	AlmA_GroupI	1.3e-06	24.5	0	0.00093	15	0	2.1	2	0	0	2	2	2	2	1
		CH_197-scaffold_8507_3	AlmA_GroupI	0.0003	16.6	0.2	0.045	9.5	0	2.5	2	1	0	2	2	2	2	0
		CH_197-scaffold_13002_9	AlmA_GroupI	0.00071	15.4	0.1	0.0011	14.7	0.1	1.3	1	0	0	1	1	1	1	0
		CH_197-scaffold_21639_4	AlmA_GroupIII	0.0016	14.3	0.1	0.057	9.2	0	2.1	1	1	1	2	2	2	2	0
		CH_197-scaffold_8507_3	AlmA_GroupIII	0.0041	13	0.1	0.31	6.8	0	2.5	2	0	0	2	2	2	2	0
		CH_197-scaffold_18754_5	AlmA_GroupIII	0.0054	12.5	0	0.01	11.6	0	1.4	1	0	0	1	1	1	1	0
		CH_197-scaffold_13164_1	AssA	1.4e-98	328	0	1.6e-98	327.8	0	1	1	0	0	1	1	1	1	1
		CH_197-scaffold_18981_1	AssA	1.6e-27	92.9	1.5	2.1e-27	92.6	1.5	1	1	0	0	1	1	1	1	1
		CH_197-scaffold_13164_1	BssA	1.8e-84	281.3	0	2.6e-84	280.7	0	1.2	1	0	0	1	1	1	1	1
		CH_197-scaffold_18981_1	BssA	1e-23	80.2	2.5	2.1e-23	79.2	2.5	1.4	1	1	0	1	1	1	1	1
		CH_197-scaffold_16010_2	CmdA	2.9e-64	214.5	0	5.9e-42	140.7	0	3	3	0	0	3	3	3	3	1
		CH_197-scaffold_51486_5	CmdA	3.8e-15	52	0	4.4e-08	28.6	0	2.1	2	0	0	2	2	2	2	1
		CH_197-scaffold_21163_1	DszC	1.6e-18	63.7	0.1	2.7e-17	59.7	0.1	2	1	1	0	1	1	1	1	1
		CH_197-scaffold_87305_1	DszC	2.7e-16	56.4	0.1	8.9e-15	51.4	0.1	2.1	1	1	0	1	1	1	1	1
		CH_197-scaffold_12617_7	DszC	5.6e-15	52	0	4.2e-14	49.1	0	2	2	0	0	2	2	2	1	1
		CH_197-scaffold_21759_3	DszC	7.1e-13	45.1	0	2.9e-12	43.1	0	1.8	1	1	0	1	1	1	1	1
		CH_197-scaffold_6579_7	DszC	3.3e-08	29.8	0	6.3e-08	28.8	0	1.4	2	0	0	2	2	2	1	1
		CH_197-scaffold_49780_2	DszC	0.00019	17.4	0	0.00028	16.8	0	1.3	1	0	0	1	1	1	1	0
		CH_197-scaffold_16010_2	EbdA	1.6e-66	221.8	0.2	1.7e-45	152.2	0.1	3.5	3	1	0	3	3	3	3	1
		CH_197-scaffold_51486_5	EbdA	1.2e-13	46.8	0.1	1.5e-08	29.9	0	2.2	1	1	1	2	2	2	2	1
		CH_197-scaffold_35071_7	EbdA	0.033	8.9	0	0.036	8.7	0	1.1	1	0	0	1	1	1	0	0
		CH_197-scaffold_26971_5	K27540	2.8e-11	40	0	3.2e-11	39.9	0	1	1	0	0	1	1	1	1	1
		CH_197-scaffold_16922_2	LadA_alpha	0.011	11.4	0	0.011	11.4	0	1.1	1	0	0	1	1	1	0	0
		CH_197-scaffold_13164_1	NmsA	1.3e-84	281.7	0	1.7e-84	281.3	0	1	1	0	0	1	1	1	1	1
		CH_197-scaffold_18981_1	NmsA	1e-23	80.3	1.7	3.7e-23	78.4	1.7	1.7	1	1	0	1	1	1	1	1
CH_198_sub	Bipolaricaulota	CH_198_sub-scaffold_12951_10	AlkB	0.00066	15	0	0.00066	15	0	1	1	0	0	1	1	1	1	0
		CH_198_sub-scaffold_1794_26	AlmA_GroupI	0.0016	13.5	0.9	0.083	7.9	0.2	2.5	3	0	0	3	3	3	2	0
		CH_198_sub-scaffold_9305_4	AlmA_GroupI	0.0067	11.5	0	0.0094	11	0	1.1	1	0	0	1	1	1	1	0
		CH_198_sub-scaffold_4536_14	AssA	8.1e-43	142.8	0	9.4e-43	142.6	0	1	1	0	0	1	1	1	1	1
		CH_198_sub-scaffold_11577_1	AssA	1.7e-23	78.9	0	1.9e-23	78.7	0	1	1	0	0	1	1	1	1	1
		CH_198_sub-scaffold_4536_13	AssA	2e-23	78.7	0	3.1e-23	78	0	1.2	1	0	0	1	1	1	1	1
		CH_198_sub-scaffold_4536_13	BssA	7.1e-33	109.8	0	1.1e-32	109.2	0	1.2	1	0	0	1	1	1	1	1
		CH_198_sub-scaffold_4536_14	BssA	1.1e-30	102.6	0.1	1.4e-30	102.3	0.1	1	1	0	0	1	1	1	1	1
		CH_198_sub-scaffold_11577_1	BssA	1e-18	63	0	1.1e-18	62.9	0	1	1	0	0	1	1	1	1	1
		CH_198_sub-scaffold_4536_14	NmsA	3.1e-30	101.2	0	3.5e-30	101	0	1	1	0	0	1	1	1	1	1
		CH_198_sub-scaffold_4536_13	NmsA	8.2e-24	79.9	0.1	2.1e-23	78.6	0.1	1.5	1	1	0	1	1	1	1	1
		CH_198_sub-scaffold_11577_1	NmsA	2.1e-19	65.3	0	2.5e-19	65.1	0	1	1	0	0	1	1	1	1	1
		CH_198_sub-scaffold_62421_5	pBmoC	0.0046	12.9	0.4	0.008	12.1	0.4	1.4	1	0	0	1	1	1	1	0
CH_200	Thermotogota	CH_200-scaffold_3230_8	AhyA	0.0089	10.8	0	0.01	10.6	0	1.1	1	0	0	1	1	1	1	0
		CH_200-scaffold_7029_3	AlkB	9e-06	21.5	0	1.1e-05	21.2	0	1.1	1	0	0	1	1	1	1	1
		CH_200-scaffold_5985_11	AlkB	1.2e-05	21.1	0	1.2e-05	21.1	0	1	1	0	0	1	1	1	1	1
		CH_200-scaffold_1797_13	AlmA_GroupI	0.0026	13.1	0.3	1.3	4.2	0	3.4	2	1	2	4	4	4	3	0
		CH_200-scaffold_4621_12	AlmA_GroupI	0.012	11	0	0.27	6.5	0	2.5	2	1	1	3	3	3	0	0
CH_202	Thermoplasmatota	CH_202-scaffold_10348_12	AbcA_1	3.1e-10	35.4	0.5	9e-10	33.9	0.5	1.7	1	1	0	1	1	1	1	1
		CH_202-scaffold_10348_12	AbcA_2	3.3e-28	94.5	5	3.8e-20	67.9	0.8	2.1	1	1	1	2	2	2	2	1
		CH_202-scaffold_2743_11	AlkB	1.7e-06	23.3	0	2.1e-06	23	0	1.1	1	0	0	1	1	1	1	1
		CH_202-scaffold_31622_3	AlkB	0.0051	11.9	0	0.0051	11.9	0	2.4	3	0	0	3	3	3	1	0
		CH_202-scaffold_12437_6	AlmA_GroupI	0.0041	11.9	0.8	0.0082	10.9	0	1.9	3	0	0	3	3	3	1	0
		CH_202-scaffold_5087_2	AlmA_GroupI	0.023	9.4	1	0.15	6.8	0.1	2.1	2	0	0	2	2	2	0	0
		CH_202-scaffold_10348_12	K27540	7.6e-18	60.7	0.7	1e-17	60.3	0.7	1.1	1	0	0	1	1	1	1	1
		CH_202-scaffold_33975_3	TmoB_BmoB	0.0093	12.5	0	0.026	11.1	0	1.7	1	0	0	1	1	1	1	0
		CH_202-scaffold_19559_10	TomA3	0.018	9.7	1.3	0.026	9.1	1.3	1.2	1	0	0	1	1	1	0	0

## Sheet: S8_HADEG
		Bins	CH_2	CH_2_sub	CH_3_sub	CH_5	CH_8	CH_8_sub	CH_10	CH_12	CH_13	CH_15	CH_15_sub	CH_16	CH_19	CH_21	CH_22	CH_23	CH_24	CH_27	CH_30	CH_32_sub	CH_34	CH_36	CH_37	CH_39	CH_42	CH_45	CH_47_sub	CH_49	CH_50	CH_51	CH_52_sub	CH_53_sub	CH_54_sub	CH_55_sub	CH_58_sub	CH_64_sub	CH_67_sub	CH_68_sub	CH_70	CH_71	CH_73	CH_73_sub	CH_74	CH_75	CH_76	CH_80	CH_81
	Gene Name	Additional Gene Information
Alkanes	ahpC	alkyl hydroperoxide reductase/A_Finnerty pathway								1						1
	ahpF	alkyl hydroperoxide reductase/A_Finnerty pathway	2	1	1	1	2	2	3	1	1	1	1		2	3	2	2	4	3	2	1	2		1	1		1	1	3	1		4	5	4	2	2	1	2	3		1	3	1	2	2	1	4	2
	alkG_rubA_rdx	alkane hydroxylase system/A_Terminal/biterminal oxidation			5	2		5	4			8	1	5	9		5		3	5	8	4					2		1			5	10	1	10	5	1				2				12	3		4	2
	alkG_rubA1_rdx	alkane hydroxylase system/A_Terminal/biterminal oxidation			1	1		1	1			1			2				1		1						1		1				2	1	3	1					1				3	1		1	1
	alkG_rubA2_rdx	alkane hydroxylase system/A_Terminal/biterminal oxidation			1	1		1	1						1				1		1												2	1	3						1				2	1			1
	alkG_rubA3_rdx	alkane hydroxylase system/A_Terminal/biterminal oxidation													1												1		1																1
	alkG_rubA4_rdx	alkane hydroxylase system/A_Terminal/biterminal oxidation			1			2	1			2	1	1	2		1	1	1	1	2	1					1		1			1	2	2	1	1					1				3	1		1	1
	alkH_ald	alkane hydroxylase system/A_Auxiliar alkane gene										1						1									1			1																		1
	alkJ_adh	A_Auxiliar alkane gene							1							2
	alkN_mcp	alkane hydroxylase system/A_Hydrocarbon uptake						3					3																																	1			1
	alkS	alkane hydroxylase system/A_Auxiliar alkane gene															2	1											1	1													3
	alkT_rubB_rdxR	alkane hydroxylase system/A_Terminal/biterminal oxidation	2		2	1		4	2			3	5	2	2	4	2	2	4	2	3				1	2	2	3	1				5	1	3		2		1	2	4				4	4			4
	almA	A_Terminal/biterminal oxidation											2			1						2								4										3			1					1
	blc	A_Hydrocarbon uptake																1
	BVMO	A_Subterminal oxidation											1									1		1						1										1								1
	CYP153	A_Terminal/biterminal oxidation																												1
	CYP450	A_Terminal/biterminal oxidation																												1
	prmB	ribosomal protein L3 N5-glutamine methyltransferase/A_Subterminal oxidation				1	2		1									1	1		2						1							2						1		1				2		1
	ssuD	FMNH2-dependent alkanesulfonate monooxygenase/A_Auxiliar alkane gene																				1
Total Alkane Markers		N/A	4	1	11	7	4	18	14	2	1	16	14	8	19	11	12	9	15	11	19	10	2	1	2	3	9	4	7	12	1	6	25	13	24	9	5	1	3	10	9	2	7	1	27	15	1	14	12
Alkenes	isoA	alkene monooxygenase oxygenase component α subunit/B_Isoprene degradation
	isoF	alkene monooxygenase reductase subunit/B_Isoprene degradation																									1
	mpdB	2-methyl-propane-1,2-diol dehydrogenase/B_2-methylpropene degradation							1
	mpdC	2-methyl-propane-1,2-diol dehydrogenase/B_2-methylpropene degradation							2	1								1												2										1			1					1
	xamoC	alkene monooxygenase reductase subunit/B_Propene degradation
	xamoF	alkene monooxygenase reductase subunit/B_Propene degradation																	1								1						1
	xecA	2-hydroxypropyl-CoM lyase/B_Propene degradation
	xecC	2-oxopropyl-CoM reductase (carboxylating)/B_Propene degradation				2	1	1	2			1	1	1		1	1		1	1	2	1	1					2					2	1	1	1		2	1				1	1				1	1
	xecD	2-(R)-hydroxypropyl-CoM dehydrogenase/B_Propene degradation	1				2	2	2	1			2		6		2	1	2	1		1	2		2		1		1	4		1	2	3	1	1	1	1	1	4		2	2		2	1		2
	xecE1	2-(S)-hydroxypropyl-CoM dehydrogenase/B_Propene degradation							1	3		2					2	3			2				1			1	2	1			1	3		1	1		1	3		1	1					1
Total Alkene Markers		N/A	1	0	0	2	3	3	8	5	0	3	3	1	6	1	5	5	4	2	4	2	3	0	3	0	3	3	3	7	0	1	6	7	2	3	2	3	3	8	0	3	5	1	2	1	0	5	1
Aromatics	abmA	2-aminobenzoyl-CoA monooxygenase reductase/Anthranilate degradation II	1									2			4						1									1		1			1	1		1								2
	abmG1	aerobic 2-aminobenzoate-CoA ligase type I/Anthranilate degradation II				1			1	2		6			1	1				1	1	1								2		3		1											1	4
	abmG2	aerobic 2-aminobenzoate-CoA ligase type 2/Anthranilate degradation II				1			1	2		6			1	1				1	1	1								2		3		1											1	4
	andAa	anthralite dioxygenase reductase component/Anthranilate degradation I					1	1	1			2	1								1		1										2		1					1	2		1			1		1
	antC	anthranilate dioxygenase reductase component/Anthranilate degradation I
	bedA	benzene 1,2-dioxygenase ferredoxin reductase subunit/Benzene degradation	2					1				2			1						1				1								1	1		1	1			2						1			1
	bedB	benzene 1,2-dioxygenase ferredoxin reductase subunit//Benzene degradation																																									1
	benC	benzoate 1,2-dioxygenase electron transfer subunit/Benzoate degradation I	1		1			1								1			1								1															1
	bphAc	biphenyl 2,3-dioxygenase, ferredoxin component/Biphenyl degradation								1
	bphAd	biphenyl 2,3-dioxygenase, reductase/Biphenyl degradation						1				2			1					1	2				1	1	2	1	1				3	1		1	1		1	1					1			1	1
	bphB	cis-2,3-dihydrobiphenyl-2,3-diol dehydrogenase/Biphenyl degradation				1			1						1	1																							1				1
	bphD	2-hydroxy-6-oxo-6-phenylhexa-2,4-dienoate hydrolase/Biphenyl degradation					1		1			1					1				1									1		1										1				1
	catB	muconate cycloisomerase/Catechol degradation III (ortho-cleavage pathway)																																1
	dmpP	phenol hydroxylase reductase component/Phenol degradation I					2		1				1				1				1						1		1													1				1
	doxE	oxepin-CoA hydrolase (multifunctional)/Naphthalene/dibenzothiophene degradation	1										1																					1								1
	dpgC	benzaldehyde dehydrogenase/Superpathway of aerobic toluene degradation										1						1									2			1																			1
	flnB	Fluorene degradation I			1	1		2		2		2	1		8	2	4	1	2		1									1			1	2	2	1				1	1		2		1	1		2
	GI:23664434	benzoate-CoA ligase (aerobic)/Benzoate degradation II	1			1		1	6			8	1		1		3		1	4	6						1			4	1	8		2		1			1			2		1	1	2			1
	hbzF	maleylpyruvate hydrolase/Gentisate degradation II						1							1	1		1	1	1		1						1		1		1		1				1
	hpaB	4-coumarate 3-monooxygenase/4-hydroxyphenylacetate degradation																														1
	hpaC	flavin:NADH reductase/4-hydroxyphenylacetate degradation																										1
	hpaH	2-hydroxyhepta-2,4-dienedioate hydratase/Anthranilate degradation IV													1		1															1
	ligC	2-hydroxy-4-carboxymyconate-6-semialdehyde dehydrogenase/Protocatechuate degradation I (meta-cleavage pathway)							2																1
	mdlD	NADP+ benzaldehyde dehydrogenase/Superpathway of aerobic toluene degradation										1						1									2
	nagAa	1-Methylnaphthalene/2-Methylnaphthalene degradation																	1								1						1
	nagB	glucosamine-6-phosphate deaminase/1-Methylnaphthalene/2-Methylnaphthalene degradation										1
	nagK	fumarylpyruvate hydrolase/Gentisate degradation I	1															1		1			1										1	1											1
	nahB	cis-1,2-dihydro-1,2-dihydroxynaphthalene-1,2-dehydrogenase/Naphthalene degradation / fluorene degradation I	1										1																					1								1
	nahE	trans-o-hydroxybenzylidenepyruvate hydratase-aldolase/Naphthalene degradation			1							1																						1
	nahF	salicylaldehyde dehydrogenase/Naphthalene degradation										1						1	1											1										2			1					1	1
	nbaA	2-nitrobenzoate nitroreductase/2-nitrobenzoate degradation I																																							1
	ndoR	naphthalene 1,2-dioxygenase complex ferrodoxin reductase component/Naphthalene/anthracene / fluorene degradation I-II																	1								1						1
	ntnC	benzaldehyde dehydrogenase/Superpathway of aerobic toluene degradation	1		1				3	2				2				1	1				1				1			2										1								1	1
	paaA	phenylacetyl-CoA 1,2-epoxidase, monooxygenase subunit/Phenylacetate degradation I																												1
	paaB	ring 1,2-phenylacetyl-CoA epoxidase PaaB subunit/Phenylacetate degradation I																												1
	paaC	ring 1,2-phenylacetyl-CoA epoxidase PaaC subunit/Phenylacetate degradation I																												1
	paaD	diphenylamine dioxygenase ferredoxin reductase component//Phenylacetate degradation I																												1
	paaE	ring 1,2-phenyacetyl-CoA epoxidase PaaE subunit/Phenylacetate degradation I																									1			1
	paaK	phenylacetate-CoA ligase (aerobic)/Phenylacetate degradation I				2						7	2							6	6						2			2		2	2	2		2	2					2				10
	padAd1	phthalate 3,4-dioxygenase ferrodoxin reductase subunit/Phthalate degradation I	1																		1
	padB2	phthalate 3,4-dihydrodiol dehydrogenase/Phthalate degradation I							1						2								1
	pcaB	3-carboxymuconate cycloisomerase/Protocatechuate degradation II (ortho-cleavage pathway)						1						1		1	1		1	1										1		2				1	1			1						1		1
	pcaD	β-ketoadipate enol-lactone hydrolase/Catechol degradation III (ortho-cleavage pathway)
	pcaF	B-ketoadipyl CoA thiolasec/Catechol degradation III (ortho-cleavage pathway)	1		1		1		4	1		5		1	3	3	4				8						1			6		5			1					2			2			4		1
	pcaI	α subunit of β-ketoadipate succinyl-CoA transferase/Catechol degradation III (ortho-cleavage pathway)	2						1						1															1					1
	pcaJ	β subunit of β-ketoadipate succinyl-CoA transferase/Catechol degradation III (ortho-cleavage pathway)	1				1		1						1															2					1
	pchA	4-hydroxybenaldehyde dehydrogenase/Superpathway of aerobic toluene degradation	1		1				2	3		1		1					1				1				1			4										1								1	2
	pchF	p-cresol methylhydroxylase flavoprotein subunit/Superpathway of aerobic toluene degradation							1								1			1	1											2														3
	phdJ	/Phenanthrene degradation																																1
	phdK	2-formylbenzoate dehydrogenase/Phenanthrene degradation	1						1	2																				2																			1
	pht2	receptor protein-tyrosine kinase/Phthalate degradation II					1												1	1	2								1																	1
	pht4	Phthalate degradation II							10	1								1							1								3	5								4	4						1
	pobA	p-hydroxybenzoate hydroxylase/Superpathway of aerobic toluene degradation														1				1
	pqsA	anthranilate-coenzyme A ligase/Anthranilate degradation II	1						2			3					2		1	3	1		1					1		2		4		2		1						1			1
	praB	2-hydroxymuconate-6-semialdehyde dehydrogenase/Protocatechuate degradation III (para-cleavage pathway)			1				2	4								1										1		2										2								2	1
	praD	2-oxo-3-hexenedioate decarboxylase/Protocatechuate degradation III (para-cleavage pathway)
	praH	5-carboxy-2-hydroxymuconate-6-semialdehyde decarboxylase/Protocatechuate degradation III (para-cleavage pathway)
	proA	HMG aldolase/Protocatechuate degradation I (meta-cleavage pathway)				1
	proD	4-carboxy-2-hydroxymuconate-6-semialdehyde dehydrogenase/Protocatechuate degradation I (meta-cleavage pathway)							3																									1
	rauF	anthranilate-CoA ligase/Anthranilate degradation II								1								1							1								1
	salA	salicylate 1-hydroxylase/Salicylate degradation I
	sdc	salicylate decarboxylase/Salicylate degradation III
	sdgA	salicyl-CoA synthase/Salicylate degradation IV					1		1			3			1	1	1				1							1				2	2							1					1	3
	sdgB	salicylyl-CoA synthase/Salicylate degradation IV							1	1		2			2	2	2	1	1	2	3				1			1		1		1	1	1				1		1		1		1	1				1
	tmoF	toluene-4-monooxygenase complex ferrodoxin oxidoreductase component/Superpathway of aerobic toluene degradation					1												1		1						2			1			1													1
	todA	toluene dioxygenase reductase subunit/Superpathway of aerobic toluene degradation	2					1				2			1						1				1								1	1			1			1						1			1
	todB	toluene dioxygenase ferrodoxin subunit/Superpathway of aerobic toluene degradation																																									1
	todD	cis-toluene dihydrodiol dehydrogenase/Superpathway of aerobic toluene degradation						1							6		3				1		1																							2
	todF	2-hydroxy-6-oxohepta-2,4-dienoate hydrolase/Superpathway of aerobic toluene degradation													1														1			1								1
	tomA5	toluene ortho-monooxygenase TomA5 subunit/Superpathway of aerobic toluene degradation					1		1							1	1				1																											1
	tphA1I	phosphoribosylanthranilate isomerase/Terephthalate degradation																	1								1						1	1
	tphB	1,2-dihydroxy-3,5-cyclohexadiene-1,4-dicarboxylate dehydrogenase/Terephthalate degradation					1		1						1				1		1						1							1								1
	xylB	D-xylose dehydrogenase/Toluene degradation						1	1																		2							2
	xylC	xylono-1,5-lactonase/Dimethylbenzene degradation	1		1				3	2				2				1	1				1				1			2										1								1	1
	xylF	2-hydroxymuconic semialdehyde hydrolase/Catechol degradation I (meta-cleavage pathway)				1									1																									1						1
	xylG	2-hydroxymuconate semialdehyde hydrolase/Catechol degradation II (meta-cleavage pathway)								2		1		1																3										2								1
	xylH	2-hydroxymuconate tautomerase/Catechol degradation II (meta-cleavage pathway)																	1
	xylI	2-oxo-3-hexenedioate decarboxylase/Catechol degradation I-II (meta-cleavage pathway)
	xylJ	2-oxopent-4-enoate hydratase/Catechol degradation I-II (meta-cleavage pathway)
	xylK	4-hydroxy-2-oxovalerate aldolase/Catechol degradation I-II (meta-cleavage pathway)				1
	xylL	1,6-dihydroxycyclohexa-2,4-diene-1-carboxylate dehydrogenase [multifunctional]/Benzoate degradation I				1		1	3	1		5			11		4		1		2				1				2	3			2	4	2	2			1	4	1		1		1	4		1
	xylZ	benzoate 1,2-dioxygenase/Benzoate degradation I	1																											1			1
Total Aromatic Markers		N/A	21	0	8	11	11	13	56	27	0	65	8	8	51	16	29	12	20	24	46	3	8	0	8	1	24	7	6	54	1	38	25	35	9	11	6	3	4	26	5	16	14	2	10	48	0	15	14
Biosurfacntants	amsY	E_Amphisin	5		3	1	3	2	6	3		15	3		4	1	4	6	1	3	8	1	5		2		4		2	6	1	11	1	1	2	1	3		2	1		3		1	5	11		1	1
	arfA	GTP cyclohydrolase II/E_Arthrofactin	6		1	1	3	2	5	2		8	4		2	1	2	4	1	2	5	1	4		1		3		2	5	1	9	1	2	2	1	2			1		3		1	4	7			2
	arfB	2-amino-5-formylamino-6-ribosylaminopyrimidin-4(3H)-one 5'-monophosphate deformylase/E_Arthrofactin	6		2	1	3	2	6	3		14	3		4	1	4	6	1	3	7	1	5		2		3		2	6	1	11	1	2	2	1	3		2	1		3		1	4	10			2
	arfC	pyrimidine nucleotide reductase/E_Arthrofactin	4		1	1	4	2	6	4		15	4		2	2	7	4	1	3	7	1	5		2		4		2	7	1	13	1	2	2	2	2			1		3		1	6	11			2
	at	L-arginine:inosamine-phosphate amidinotransferase/E_Sophorolipids											1																																	1
	ffp	E_Fengacyn	1
	ituA	E_Iturin	4		3	3	5	4	8	5		15	4		3	2	5	5	2	4	10	2	6		2		5	2	3	10	1	12	1	4	3	2	2		1	2	1	4	2	1	4	13		2	2
	ituB	E_Iturin	4		1	1	4	2	6	4		9	3		1		3	5	2	3	7	1	5		2		4	1	2	7	1	10	1	2	2	1	3		1	2		3		1	5	10			2
	ituC	E_Iturin	4		1	1	4	2	6	3		9	3		1		2	4	1	2	8	1	4		1		3	1	2	6	1	10	1	2	2	2	3		1	2	1	3	1	1	4	9		1	2
	ituD	E_Iturin	1			1	2	1		1			2	1	1		1	1	1		1				1		2		1				1	1	1	1	1	1	1	1	1	1				1		1	1
	mycA	(5S)-5-hydroxycyclohex-1-ene-1-carbonyl-CoA reductase/E_Mycosubtilin	4		3	3	6	3	8	5		14	4		3	2	4	6	3	4	9	2	5		2		5	2	3	10	1	12	1	4	3	2	2		1	2	1	5	2	1	4	11		2	3
	mycB	protomycinolide IV desosaminyltransferase/E_Mycosubtilin	4		1	1	4	2	6	3		12	3		2		6	4	3	2	7	1	4		1		5		2	6	1	9	1	1	2	1	3		1	2		3	1	1	5	10			2
	mycC	mycinamicin VIII monooxygenase subunit/E_Mycosubtilin	5		1	1	4	2	6	3		10	3		1		4	4	2	2	8	1	4		1		4	1	2	6	1	10	1	1	2	1	3		1	2	1	3	1	1	5	11		1	2
	ppsA	phosphoenolpyruvate synthetase/E_Plipastatin	3		2	2	4	2	6	4		9	2		3		4	5	1	4	7	1	5		2		3	1	2	8	1	13	1	1	2	1	2		1	2	1	3		1	4	8			2
	ppsB	phthiocerol synthase PpsB PKS/E_Plipastatin	5		2	1	3	2	7	3		10	3		2		3	6	1	3	8	1	5		2		4		2	7	1	11	1	2	2	2	3		1	2	1	3		1	4	9		1	2
	ppsC	phthiocerol synthase PpsC PKS/E_Plipastatin	4		2	1	4	2	6	3		8	3		1		3	5	1	3	7	1	5		2		4		2	7	1	9	1	2	2	1	3		1	2	1	3		1	4	8		1	2
	ppsD	phthiocerol synthase PpsD PKS/E_Plipastatin	5		1	1	4	2	6	2		14	3		1	1	4	4	2	3	8	1	4		1		4		2	6	1	12	1	2	2	1	3		1	2	1	3	2	1	4	10			2
	ppsE	phthiocerol synthase PpsE PKS/E_Plipastatin	5		1	2	3	2	6	3		10	3		2		6	4	2	3	8	1	5		2		3		2	7	1	11	1	2	2	1	3		1	2	1	3			4	8			2
	rhlB	RhlB rhamnosyltransferase/E_Rhamnolipids	5		3	1	4	1	1	1		2	2		1	2		1	1		1	1		2	2	1				2		1	2	1	3	1	1		1	1		1	1	1	4		1	1	1
	rhlC	rhamnosyltransferase 2/E_Rhamnolipids
	rhlR	E_Rhamnolipids
	sfp	4'-phosphopantetheinyl transferase/E_Surfactin	1
	srfAA	E_Surfactin	4		2	2	3	2	6	3		13	3		2		5	6	2	4	8	1	5		2		4	1	2	6	1	14	2	2	2	2	3		1	2		3		1	5	10		1	2
	srfAB	E_Surfactin	3		2	1	4	2	6	4		10	3		1		4	6	2	3	8	1	5		3		4		2	7	1	13	2	2	2	1	3		1	2	1	3		1	4	10		1	2
	wzb	protein-tyrosine phosphatase/E_Emulsan	1																																							1
	wzc	protein-tyrosine kinase Wzc/E_Emulsan			1	2	1	2		1									1		1		1				1	1									1						1			1
Total Biosurfactant Markers		N/A	84	0	33	28	72	41	107	60	0	197	59	1	37	12	71	86	31	51	133	20	82	2	33	1	69	10	37	119	17	191	22	36	40	25	49	1	19	32	11	57	11	17	79	169	1	13	36
Polymers	AAW51_2473	PCL/PET	1																															1
	ABO_1197	PLA/PBSA/PCL																												1																1
	ABO_2449	PBSA/PCL/PES/PHA/PLA															1				1																									1
	ALC24_4107	PHB																																1
	BAY15_3292	PVA																																											1
	BSQ33_03270	PCL/PET																																						1
	CLOSTHATH_07193	PBAT											1		1																																		1
	cut	PCL/PET/PEA
	cut_1	very-long-chain 3-ketoacyl-CoA synthase/PET
	cut1	very-long-chain 3-ketoacyl-CoA synthase/PET
	cut2	cutinase/PCL
	cutA	aldehyde dehydrogenase α subunit/PCL/PET
	est	carboxylester hydrolase/PBSA/PCL/PET/PLA/PU/PBAT	7		2							2			5			4					1							1				1						1		1	5					2	1
	est1	vacuolar ABC transporter C family member 1/PCL/PET
	est2	PCL
	estA	versiconol acetate esterase / versiconal hemiacetal acetate esterase/PBAT
	estC	geranyl acetate esterase/PBSA/PLA													1			1																															1
	FB4_0780	PBAT
	GEN0105	3PET/PCL/PLA													1			1												1
	hbd	3-hydroxybutyryl-CoA dehydrogenase/P3HV/PHA/PHBV					1					2			1	1						1							1	1				1									1			2
	lipA	lipoyl synthase (lipoic acid synthetase)/PBSA/PCL/PET																						1
	NFA_28320	Nylon																			1		1							1		1	2					1		1						1
	nylA	6-aminohexnoate cyclic dimer hydrolase/Nylon				2		2	2		2	2		2	5		4				4		1	2			2			4			2		2	2	2	2	2	2	2		2			2
	nylC	6-aminohexanoate oligomer hydrolase polypeptide II/Nylon
	OA86_11720	PCL/PET/PU	1				2											1
	pDS	15-cis-phytoene desaturase/PHA							1														1											1
	pegA	PEG							1							1
	pegC	PEG							1	2				2					1								1			3										1								1
	peth	ferredoxin-NADP oxidoreductase/PCL/PET/PU
	phaZ	intracellular poly(3-hydroxyoctanoate) depolymerase/PCL/PEA/PES/P3HPPHBV/PHO/PHPV			1				2											1			1				5				2			2
	phaZ2	D-(-)-3-hydroxybutyrate oligomer hydrolase/PHA/PHB																					1										1
	phaZ3	PHA/PHB																																1
	phaZ4	PHA/PHB																					1											1
	phaZ5	PHA/PHB							1														1											1
	phaZ7	poly(3-hydroxybutyrate) depolymerase/PHA/PHB			1
	phaZc	PHA/PHB
	phaZpst	P3HP/P4HP/PEA/PES/PHB																									2				1
	plaM7	PBSA/PCL/PES/PHA/PHB/PLA					1														1												1						1
	plaM9	PBSA/PBS/PCL/PES/PHA/PLA	1		1		1					1	1			1																			1										1
	pnbA	4-nitrobenzoate reductase/PET											1		1			1																															1
	PROK	PLA	1				1		2	2	1		1	1									1						1										1										1
	pudA	PU													1															1
	pvaA	polyvinyl alcohol dehydrogenase (cytochrome)/PVA							1
	RBTH_03267	PHA/PHB													1		1				1
	SAMN04487908_10753	PCL/PU			3
	SUBB_LEDLE	PLA							1	6				4					1										1								1			2					4
	subC	PLA					1		1	4			1	4					2				1						1								1			2			1		3	1		1
	SUBS_LEDLE	PLA							1	6				4					1										1								1			2					4
	Tcur_0390	PCL/PET
	Tcur_1278	PET
Total Polymer Markers		N/A	11	0	8	2	7	2	14	20	3	7	5	17	17	3	6	8	5	1	8	1	10	3	0	0	10	0	5	13	3	1	6	10	3	2	5	3	4	12	2	1	9	0	13	8	0	4	5
[truncated: 52 more columns]

## Sheet: S9_AlkBGHJKT
Scaffold ID	Alkane Monooxygenase Annotation
CH_19-scaffold_59224_7	AlkB
CH_22-scaffold_3128_14	AlkB
CH_27-scaffold_10160_9	AlkB
CH_51-scaffold_94032_1	AlkB
CH_70-scaffold_140882_2	AlkB
CH_75-scaffold_4375_1	AlkB
CH_123-scaffold_169_40	AlkB
CH_139-scaffold_6728_12	AlkB
CH_140-scaffold_37704_3	AlkB
CH_174_sub-scaffold_1804_5	AlkB
CH_178-scaffold_99_29	AlkB
CH_200-scaffold_7029_3	AlkB
CH_202-scaffold_2743_11	AlkB
CH_19-scaffold_25725_4	AlkG
CH_22-scaffold_3128_14	AlkG
CH_27-scaffold_10160_9	AlkG
CH_51-scaffold_94032_1	AlkG
CH_70-scaffold_140882_2	AlkG
CH_75-scaffold_4375_1	AlkG
CH_123-scaffold_169_40	AlkG
CH_139-scaffold_6728_12	AlkG
CH_140-scaffold_37704_3	AlkG
CH_174_sub-scaffold_1804_5	AlkG
CH_178-scaffold_99_29	AlkG
CH_200-scaffold_16111_25	AlkG
CH_202-scaffold_2743_11	AlkG
CH_19-scaffold_77517_1	AlkH
CH_22-scaffold_736_26	AlkH
CH_51-scaffold_22572_1	AlkH
CH_70-scaffold_116076_2	AlkH
CH_75-scaffold_14126_9	AlkH
CH_123-scaffold_1441_8	AlkH
CH_139-scaffold_1380_7	AlkH
CH_140-scaffold_8859_12	AlkH
CH_178-scaffold_122_43	AlkH
CH_200-scaffold_6527_11	AlkH
CH_22-scaffold_1254_29	AlkJ
CH_139-scaffold_2193_35	AlkJ
CH_174_sub-scaffold_541_12	AlkJ
CH_200-scaffold_731_22	AlkJ
CH_19-scaffold_10869_2	AlkK
CH_22-scaffold_1011_1	AlkK
CH_27-scaffold_10171_2	AlkK
CH_51-scaffold_101947_2	AlkK
CH_70-scaffold_44758_4	AlkK
CH_75-scaffold_10608_1	AlkK
CH_123-scaffold_114_38	AlkK
CH_139-scaffold_1141_1	AlkK
CH_140-scaffold_13505_11	AlkK
CH_174_sub-scaffold_30_17	AlkK
CH_178-scaffold_1076_24	AlkK
CH_202-scaffold_10348_6	AlkK
CH_19-scaffold_10919_4	AlkT
CH_22-scaffold_1381_20	AlkT
CH_27-scaffold_11888_3	AlkT
CH_70-scaffold_100224_1	AlkT
CH_75-scaffold_10272_2	AlkT
CH_123-scaffold_134_15	AlkT
CH_139-scaffold_13731_3	AlkT
CH_140-scaffold_119428_1	AlkT
CH_174_sub-scaffold_1547_13	AlkT
CH_178-scaffold_202_32	AlkT
CH_200-scaffold_1611_6	AlkT
CH_202-scaffold_10031_4	AlkT

## Sheet: S10_Bacterial_RP_Reference_Seqs
ID	GTDBTk Phyla
GCA_000299115.1_ASM29911v1_genomic.fna	Proteobacteria
GCA_000503835.1_ASM50383v1_genomic.fna	Patescibacteria
GCA_000522425.1_v3_genomic.fna	Tectomicrobia
GCA_000739515.1_ASM73951v1_genomic.fna	Moduliflexota
GCA_000980735.1_ASM98073v1_genomic.fna	WOR-3
GCA_000992445.2_ASM99244v2_genomic.fna	Patescibacteria
GCA_001023575.1_ASM102357v1_genomic.fna	Actinobacteriota
GCA_001029635.1_ASM102963v1_genomic.fna	Patescibacteria
GCA_001029735.1_ASM102973v1_genomic.fna	Patescibacteria
GCA_001029795.1_ASM102979v1_genomic.fna	Patescibacteria
GCA_001302725.1_ASM130272v1_genomic.fna	Zixibacteria
GCA_001302825.1_ASM130282v1_genomic.fna	Planctomycetota
GCA_001302835.1_ASM130283v1_genomic.fna	TA06
GCA_001304015.1_ASM130401v1_genomic.fna	TA06
GCA_001304035.1_ASM130403v1_genomic.fna	SM23-31
GCA_001430755.1_ASM143075v1_genomic.fna	Patescibacteria
GCA_001447805.1_ASM144780v1_genomic.fna	Proteobacteria
GCA_001513395.1_ASM151339v1_genomic.fna	Firmicutes
GCA_001513495.1_ASM151349v1_genomic.fna	Firmicutes
GCA_001602415.1_ASM160241v1_genomic.fna	Bacteroidota
GCA_001664505.1_ASM166450v1_genomic.fna	Acidobacteriota
GCA_001730085.1_AB1_pvc_genomic.fna	GCA-001730085
GCA_001765415.1_ASM176541v1_genomic.fna	Cyanobacteria
GCA_001767035.1_ASM176703v1_genomic.fna	Acidobacteriota
GCA_001769355.1_ASM176935v1_genomic.fna	Bacteroidota
GCA_001771735.1_ASM177173v1_genomic.fna	WOR-3
GCA_001772805.1_ASM177280v1_genomic.fna	Patescibacteria
GCA_001774505.1_ASM177450v1_genomic.fna	RBG-13-66-14
GCA_001774755.1_ASM177475v1_genomic.fna	Patescibacteria
GCA_001775355.1_ASM177535v1_genomic.fna	Zixibacteria
GCA_001778095.1_ASM177809v1_genomic.fna	Patescibacteria
GCA_001778355.1_ASM177835v1_genomic.fna	Firestonebacteria
GCA_001778455.1_ASM177845v1_genomic.fna	Bipolaricaulota
GCA_001780825.1_ASM178082v1_genomic.fna	Gemmatimonadota
GCA_001782795.1_ASM178279v1_genomic.fna	Lindowbacteria
GCA_001783275.1_ASM178327v1_genomic.fna	Margulisbacteria
GCA_001790645.1_ASM179064v1_genomic.fna	Schekmanbacteria
GCA_001790815.1_ASM179081v1_genomic.fna	Patescibacteria
GCA_001791465.1_ASM179146v1_genomic.fna	Patescibacteria
GCA_001794905.1_ASM179490v1_genomic.fna	Chlamydiota
GCA_001797525.1_ASM179752v1_genomic.fna	Fibrobacterota
GCA_001797745.1_ASM179774v1_genomic.fna	Desulfobacterota
GCA_001797815.1_ASM179781v1_genomic.fna	RBG-13-61-14
GCA_001798265.1_ASM179826v1_genomic.fna	Bdellovibrionota
GCA_001798285.1_ASM179828v1_genomic.fna	UBA10199
GCA_001798605.1_ASM179860v1_genomic.fna	Myxococcota
GCA_001799195.1_ASM179919v1_genomic.fna	Bdellovibrionota
GCA_001800075.1_ASM180007v1_genomic.fna	Elusimicrobiota
GCA_001800185.1_ASM180018v1_genomic.fna	Elusimicrobiota
GCA_001801365.1_ASM180136v1_genomic.fna	Proteobacteria
GCA_001801435.1_ASM180143v1_genomic.fna	Proteobacteria
GCA_001803795.1_ASM180379v1_genomic.fna	Nitrospirota
GCA_001803875.1_ASM180387v1_genomic.fna	Nitrospirota
GCA_001804045.1_ASM180404v1_genomic.fna	Omnitrophota
GCA_001816645.1_ASM181664v1_genomic.fna	Patescibacteria
GCA_001818315.1_ASM181831v1_genomic.fna	Patescibacteria
GCA_001819435.1_ASM181943v1_genomic.fna	Patescibacteria
GCA_001822815.1_ASM182281v1_genomic.fna	Patescibacteria
GCA_001824325.1_ASM182432v1_genomic.fna	Patescibacteria
GCA_001858525.1_ASM185852v1_genomic.fna	Cyanobacteria
GCA_001873755.1_ASM187375v1_genomic.fna	Patescibacteria
GCA_002007425.1_USCg1.0_genomic.fna	Proteobacteria
GCA_002010665.1_ASM201066v1_genomic.fna	Acidobacteriota
GCA_002010915.1_ASM201091v1_genomic.fna	Desulfobacterota
GCA_002011615.1_ASM201161v1_genomic.fna	WOR-3
GCA_002049985.1_ASM204998v1_genomic.fna	Latescibacterota
GCA_002050035.1_ASM205003v1_genomic.fna	4484-113
GCA_002059205.1_ASM205920v1_genomic.fna	Latescibacterota
GCA_002068205.1_ASM206820v1_genomic.fna	Sumerlaeota
GCA_002070295.1_ASM207029v1_genomic.fna	Latescibacterota
GCA_002084765.1_ASM208476v1_genomic.fna	4572-55
GCA_002084875.1_ASM208487v1_genomic.fna	Chloroflexota
GCA_002085265.1_ASM208526v1_genomic.fna	Omnitrophota
GCA_002085385.1_ASM208538v1_genomic.fna	UBP14
GCA_002238905.1_ASM223890v1_genomic.fna	Proteobacteria
GCA_002256535.1_ASM225653v1_genomic.fna	WOR-3
GCA_002282095.1_ASM228209v1_genomic.fna	Proteobacteria
GCA_002295665.1_ASM229566v1_genomic.fna	Margulisbacteria
GCA_002304935.1_ASM230493v1_genomic.fna	Actinobacteriota
GCA_002305165.1_ASM230516v1_genomic.fna	Armatimonadota
GCA_002311595.1_ASM231159v1_genomic.fna	Chloroflexota
GCA_002311855.1_ASM231185v1_genomic.fna	Desulfobacterota
GCA_002313395.1_ASM231339v1_genomic.fna	Proteobacteria
GCA_002323315.1_ASM232331v1_genomic.fna	Myxococcota
GCA_002329525.1_ASM232952v1_genomic.fna	Firmicutes
GCA_002329605.1_ASM232960v1_genomic.fna	UBA1439
GCA_002339345.1_ASM233934v1_genomic.fna	Firmicutes
GCA_002340265.1_ASM234026v1_genomic.fna	Verrucomicrobiota
GCA_002340345.1_ASM234034v1_genomic.fna	Proteobacteria
GCA_002343185.1_ASM234318v1_genomic.fna	Bdellovibrionota
GCA_002343265.1_ASM234326v1_genomic.fna	Proteobacteria
GCA_002352365.1_ASM235236v1_genomic.fna	Chloroflexota
GCA_002352935.1_ASM235293v1_genomic.fna	Firmicutes
GCA_002366635.1_ASM236663v1_genomic.fna	WOR-3
GCA_002366995.1_ASM236699v1_genomic.fna	UBA3054
GCA_002367385.1_ASM236738v1_genomic.fna	WOR-3
GCA_002375895.1_ASM237589v1_genomic.fna	Firmicutes
GCA_002375925.1_ASM237592v1_genomic.fna	Firmicutes
GCA_002376005.1_ASM237600v1_genomic.fna	Firmicutes
GCA_002377445.1_ASM237744v1_genomic.fna	Myxococcota
GCA_002377535.1_ASM237753v1_genomic.fna	Proteobacteria
GCA_002383345.1_ASM238334v1_genomic.fna	Chloroflexota
GCA_002386005.1_ASM238600v1_genomic.fna	DTU030
GCA_002386085.1_ASM238608v1_genomic.fna	Firmicutes
GCA_002389445.1_ASM238944v1_genomic.fna	Actinobacteriota
GCA_002390145.1_ASM239014v1_genomic.fna	Chloroflexota
GCA_002401425.1_ASM240142v1_genomic.fna	Patescibacteria
GCA_002401765.2_ASM240176v2_genomic.fna	Proteobacteria
GCA_002402325.1_ASM240232v1_genomic.fna	Acidobacteriota
GCA_002404055.1_ASM240405v1_genomic.fna	Chloroflexota
GCA_002408345.1_ASM240834v1_genomic.fna	Firmicutes
GCA_002410925.1_ASM241092v1_genomic.fna	UBP13
GCA_002411145.1_ASM241114v1_genomic.fna	Firmicutes
GCA_002412545.1_ASM241254v1_genomic.fna	Elusimicrobiota
GCA_002418965.1_ASM241896v1_genomic.fna	Firmicutes
GCA_002422125.1_ASM242212v1_genomic.fna	UBP17
GCA_002423325.1_ASM242332v1_genomic.fna	Chloroflexota
GCA_002423965.1_ASM242396v1_genomic.fna	Firmicutes
GCA_002424725.1_ASM242472v1_genomic.fna	Acidobacteriota
GCA_002426275.1_ASM242627v1_genomic.fna	Firmicutes
GCA_002426645.1_ASM242664v1_genomic.fna	Firmicutes
GCA_002427435.1_ASM242743v1_genomic.fna	Firmicutes
GCA_002428325.1_ASM242832v1_genomic.fna	UBP4
GCA_002428525.1_ASM242852v1_genomic.fna	UBP14
GCA_002429005.1_ASM242900v1_genomic.fna	Verrucomicrobiota
GCA_002431715.1_ASM243171v1_genomic.fna	Armatimonadota
GCA_002432655.1_ASM243265v1_genomic.fna	Proteobacteria
GCA_002433485.1_ASM243348v1_genomic.fna	Myxococcota
GCA_002435745.1_ASM243574v1_genomic.fna	UBP15
GCA_002440765.1_ASM244076v1_genomic.fna	UBA6266
GCA_002450515.1_ASM245051v1_genomic.fna	Chloroflexota
GCA_002450905.1_ASM245090v1_genomic.fna	Spirochaetota
GCA_002450975.1_ASM245097v1_genomic.fna	Proteobacteria
GCA_002453135.1_ASM245313v1_genomic.fna	Myxococcota
GCA_002453795.1_ASM245379v1_genomic.fna	Proteobacteria
GCA_002469865.1_ASM246986v1_genomic.fna	Proteobacteria
GCA_002469885.1_ASM246988v1_genomic.fna	Proteobacteria
GCA_002471405.1_ASM247140v1_genomic.fna	Margulisbacteria
GCA_002478245.1_ASM247824v1_genomic.fna	UBP18
GCA_002479255.1_ASM247925v1_genomic.fna	Desulfobacterota
GCA_002480255.1_ASM248025v1_genomic.fna	Margulisbacteria
GCA_002482535.1_ASM248253v1_genomic.fna	Firmicutes
GCA_002483345.1_ASM248334v1_genomic.fna	Bacteroidota
GCA_002632265.1_ASM263226v1_genomic.fna	Proteobacteria
GCA_002686915.1_ASM268691v1_genomic.fna	ARS69
GCA_002686955.1_ASM268695v1_genomic.fna	Gemmatimonadota
GCA_002721365.1_ASM272136v1_genomic.fna	Proteobacteria
GCA_002746255.1_ASM274625v1_genomic.fna	Proteobacteria
GCA_002746535.1_ASM274653v1_genomic.fna	Planctomycetota
GCA_002747355.1_ASM274735v1_genomic.fna	Myxococcota
GCA_002770755.1_ASM277075v1_genomic.fna	Patescibacteria
GCA_002771845.1_ASM277184v1_genomic.fna	WOR-3
GCA_002772595.1_ASM277259v1_genomic.fna	Patescibacteria
GCA_002772895.1_ASM277289v1_genomic.fna	Patescibacteria
GCA_002773845.1_ASM277384v1_genomic.fna	Patescibacteria
GCA_002773985.1_ASM277398v1_genomic.fna	Patescibacteria
GCA_002774225.1_ASM277422v1_genomic.fna	Patescibacteria
GCA_002774285.1_ASM277428v1_genomic.fna	Patescibacteria
GCA_002774365.1_ASM277436v1_genomic.fna	Margulisbacteria
GCA_002774575.1_ASM277457v1_genomic.fna	Patescibacteria
GCA_002779365.1_ASM277936v1_genomic.fna	Patescibacteria
GCA_002779395.1_ASM277939v1_genomic.fna	Bacteroidota
GCA_002779445.1_ASM277944v1_genomic.fna	Desantisbacteria
GCA_002779715.1_ASM277971v1_genomic.fna	Patescibacteria
GCA_002780005.1_ASM278000v1_genomic.fna	Omnitrophota
GCA_002780065.1_ASM278006v1_genomic.fna	UBA8481
GCA_002780085.1_ASM278008v1_genomic.fna	Patescibacteria
GCA_002780305.1_ASM278030v1_genomic.fna	Patescibacteria
GCA_002780625.1_ASM278062v1_genomic.fna	Omnitrophota
GCA_002780715.1_ASM278071v1_genomic.fna	Desulfobacterota
GCA_002781045.1_ASM278104v1_genomic.fna	Elusimicrobiota
GCA_002782985.1_ASM278298v1_genomic.fna	Ratteibacteria
GCA_002783265.1_ASM278326v1_genomic.fna	Patescibacteria
GCA_002783345.1_ASM278334v1_genomic.fna	Actinobacteriota
GCA_002784945.1_ASM278494v1_genomic.fna	Patescibacteria
GCA_002785215.1_ASM278521v1_genomic.fna	Patescibacteria
GCA_002785285.1_ASM278528v1_genomic.fna	Patescibacteria
GCA_002785325.1_ASM278532v1_genomic.fna	Patescibacteria
GCA_002786635.1_ASM278663v1_genomic.fna	Patescibacteria
GCA_002787095.1_ASM278709v1_genomic.fna	Omnitrophota
GCA_002789955.1_ASM278995v1_genomic.fna	Myxococcota
GCA_002790075.1_ASM279007v1_genomic.fna	Patescibacteria
GCA_002791595.1_ASM279159v1_genomic.fna	Zixibacteria
GCA_002792135.1_ASM279213v1_genomic.fna	Patescibacteria
GCA_002793495.1_ASM279349v1_genomic.fna	Proteobacteria
GCA_002793635.1_ASM279363v1_genomic.fna	Patescibacteria
GCA_002793655.1_ASM279365v1_genomic.fna	Patescibacteria
GCA_002793855.1_ASM279385v1_genomic.fna	Patescibacteria
GCA_002793915.1_ASM279391v1_genomic.fna	Patescibacteria
GCA_002794075.1_ASM279407v1_genomic.fna	Patescibacteria
GCA_002796125.1_ASM279612v1_genomic.fna	Omnitrophota
GCA_002841685.1_ASM284168v1_genomic.fna	CG03
GCA_002841695.1_ASM284169v1_genomic.fna	Elusimicrobiota
GCA_002841945.1_ASM284194v1_genomic.fna	Myxococcota
GCA_002842085.1_ASM284208v1_genomic.fna	Chloroflexota
GCA_002843005.1_ASM284300v1_genomic.fna	Actinobacteriota
GCA_002868855.1_ASM286885v1_genomic.fna	Proteobacteria
GCA_002869225.1_ASM286922v1_genomic.fna	Muirbacteria
GCA_002897735.1_ASM289773v1_genomic.fna	Proteobacteria
GCA_002898315.1_ASM289831v1_genomic.fna	Calescibacterota
GCA_002898535.1_ASM289853v1_genomic.fna	Acidobacteriota
GCA_002898575.1_ASM289857v1_genomic.fna	Armatimonadota
GCA_002938125.1_ASM293812v1_genomic.fna	Proteobacteria
GCA_003021915.1_ASM302191v1_genomic.fna	Patescibacteria
GCA_003022365.1_ASM302236v1_genomic.fna	Patescibacteria
GCA_003056185.1_ASM305618v1_genomic.fna	Patescibacteria
GCA_003141835.1_20120800_E1X_genomic.fna	Omnitrophota
GCA_003142435.1_20120800_E3D_genomic.fna	Proteobacteria
GCA_003153935.1_20120700_E3M_genomic.fna	UBA6262
GCA_003154025.1_20120700_E3M_genomic.fna	Desulfobacterota
GCA_003157225.1_20120600_E3D_genomic.fna	Actinobacteriota
GCA_003161835.1_20100900_E3S_genomic.fna	Myxococcota
GCA_003164655.1_20120700_S1D_genomic.fna	Actinobacteriota
GCA_003164675.1_20120700_S1D_genomic.fna	Verrucomicrobiota
GCA_003165335.1_20120700_S1D_genomic.fna	Proteobacteria
GCA_003170085.1_20110800_E3D_genomic.fna	Planctomycetota
GCA_003170555.1_20110800_E3D_genomic.fna	FEN-1099
GCA_003222245.1_ASM322224v1_genomic.fna	Acidobacteriota
GCA_003222305.1_ASM322230v1_genomic.fna	Acidobacteriota
GCA_003222765.1_ASM322276v1_genomic.fna	Acidobacteriota
GCA_003223995.1_ASM322399v1_genomic.fna	Acidobacteriota
GCA_003224585.1_ASM322458v1_genomic.fna	Acidobacteriota
GCA_003228115.1_ASM322811v1_genomic.fna	Chloroflexota
GCA_003228965.1_ASM322896v1_genomic.fna	Proteobacteria
GCA_003230535.1_ASM323053v1_genomic.fna	SZUA-182
GCA_003230795.1_ASM323079v1_genomic.fna	Bdellovibrionota
GCA_003232385.1_ASM323238v1_genomic.fna	SZUA-79
GCA_003233075.1_ASM323307v1_genomic.fna	Proteobacteria
GCA_003244175.1_ASM324417v1_genomic.fna	Chloroflexota
GCA_003249585.1_ASM324958v1_genomic.fna	Myxococcota
GCA_003290465.1_ASM329046v1_genomic.fna	Sumerlaeota
GCA_003354005.1_ASM335400v1_genomic.fna	Proteobacteria
GCA_003366055.1_ASM336605v1_genomic.fna	Dependentiae
GCA_003446135.1_ASM344613v1_genomic.fna	Proteobacteria
GCA_003447545.1_ASM344754v1_genomic.fna	Desulfobacterota
GCA_003449495.1_ASM344949v1_genomic.fna	Firmicutes
GCA_003450915.1_ASM345091v1_genomic.fna	Proteobacteria
GCA_003452515.1_ASM345251v1_genomic.fna	Myxococcota
GCA_003453555.1_ASM345355v1_genomic.fna	Chloroflexota
GCA_003454335.1_ASM345433v1_genomic.fna	Proteobacteria
GCA_003454415.1_ASM345441v1_genomic.fna	Proteobacteria
GCA_003477045.1_ASM347704v1_genomic.fna	Delongbacteria
GCA_003477185.1_ASM347718v1_genomic.fna	Verrucomicrobiota
GCA_003485015.1_ASM348501v1_genomic.fna	UBA9089
GCA_003485165.1_ASM348516v1_genomic.fna	Proteobacteria
GCA_003485715.1_ASM348571v1_genomic.fna	Proteobacteria
GCA_003485765.1_ASM348576v1_genomic.fna	Omnitrophota
GCA_003485785.1_ASM348578v1_genomic.fna	Patescibacteria
GCA_003486845.1_ASM348684v1_genomic.fna	Elusimicrobiota
GCA_003488345.1_ASM348834v1_genomic.fna	Wallbacteria
GCA_003489165.1_ASM348916v1_genomic.fna	Nitrospinota
GCA_003491635.1_ASM349163v1_genomic.fna	Actinobacteriota
GCA_003497555.1_ASM349755v1_genomic.fna	Spirochaetota
GCA_003498085.1_ASM349808v1_genomic.fna	UBA9089
GCA_003500335.1_ASM350033v1_genomic.fna	Firmicutes
GCA_003501005.1_ASM350100v1_genomic.fna	Patescibacteria
GCA_003501375.1_ASM350137v1_genomic.fna	Sumerlaeota
GCA_003503675.1_ASM350367v1_genomic.fna	Cyanobacteria
GCA_003509045.1_ASM350904v1_genomic.fna	Planctomycetota
GCA_003509265.1_ASM350926v1_genomic.fna	Myxococcota
GCA_003510095.1_ASM351009v1_genomic.fna	Firmicutes
GCA_003512065.1_ASM351206v1_genomic.fna	Marinisomatota
GCA_003516225.1_ASM351622v1_genomic.fna	Patescibacteria
GCA_003517845.1_ASM351784v1_genomic.fna	Firmicutes
GCA_003518055.1_ASM351805v1_genomic.fna	Patescibacteria
GCA_003518965.1_ASM351896v1_genomic.fna	Patescibacteria
GCA_003519105.1_ASM351910v1_genomic.fna	Fusobacteriota
GCA_003520685.1_ASM352068v1_genomic.fna	Patescibacteria
GCA_003520765.1_ASM352076v1_genomic.fna	Edwardsbacteria
GCA_003520965.1_ASM352096v1_genomic.fna	Zixibacteria
GCA_003521475.1_ASM352147v1_genomic.fna	Proteobacteria
GCA_003521505.1_ASM352150v1_genomic.fna	Proteobacteria
GCA_003521695.1_ASM352169v1_genomic.fna	Proteobacteria
GCA_003526185.1_ASM352618v1_genomic.fna	WOR-3
GCA_003527115.1_ASM352711v1_genomic.fna	Patescibacteria
GCA_003527435.1_ASM352743v1_genomic.fna	Spirochaetota
GCA_003530255.1_ASM353025v1_genomic.fna	Firmicutes
GCA_003534415.1_ASM353441v1_genomic.fna	Firmicutes
GCA_003535395.1_ASM353539v1_genomic.fna	Firmicutes
GCA_003537615.1_ASM353761v1_genomic.fna	Margulisbacteria
GCA_003538775.1_ASM353877v1_genomic.fna	Thermotogota
GCA_003542495.1_ASM354249v1_genomic.fna	Proteobacteria
GCA_003545155.1_ASM354515v1_genomic.fna	Bipolaricaulota
GCA_003554345.1_ASM355434v1_genomic.fna	T1SED10-198M
GCA_003557545.1_ASM355754v1_genomic.fna	T1Sed10-126
GCA_003561965.1_ASM356196v1_genomic.fna	PUNC01
GCA_003565195.1_ASM356519v1_genomic.fna	Verrucomicrobiota
GCA_003576755.1_ASM357675v1_genomic.fna	Chloroflexota
GCA_003577105.1_ASM357710v1_genomic.fna	Actinobacteriota
GCA_003598065.1_ASM359806v1_genomic.fna	Myxococcota
GCA_003599235.1_ASM359923v1_genomic.fna	Actinobacteriota
GCA_003599335.1_ASM359933v1_genomic.fna	Patescibacteria
GCA_003644275.1_ASM364427v1_genomic.fna	Planctomycetota
GCA_003644325.1_ASM364432v1_genomic.fna	Planctomycetota
GCA_003644825.1_ASM364482v1_genomic.fna	SM23-31
GCA_003645455.1_ASM364545v1_genomic.fna	Proteobacteria
GCA_003645735.1_ASM364573v1_genomic.fna	Poribacteria
GCA_003645805.1_ASM364580v1_genomic.fna	Omnitrophota
GCA_003646715.1_ASM364671v1_genomic.fna	Desulfobacterota
GCA_003647695.1_ASM364769v1_genomic.fna	RBG-13-66-14
GCA_003650255.1_ASM365025v1_genomic.fna	CG03
GCA_003694425.1_ASM369442v1_genomic.fna	Proteobacteria
GCA_003694635.1_ASM369463v1_genomic.fna	Planctomycetota
GCA_003694875.1_ASM369487v1_genomic.fna	Planctomycetota
GCA_003695505.1_ASM369550v1_genomic.fna	J088
GCA_003695825.1_ASM369582v1_genomic.fna	Proteobacteria
GCA_003696125.1_ASM369612v1_genomic.fna	Tectomicrobia
GCA_003696465.1_ASM369646v1_genomic.fna	Proteobacteria
GCA_003696645.1_ASM369664v1_genomic.fna	Proteobacteria
GCA_003697105.1_ASM369710v1_genomic.fna	4572-55
GCA_003864455.1_ASM386445v1_genomic.fna	Margulisbacteria
GCA_004292515.1_ASM429251v1_genomic.fna	Cyanobacteria
GCA_004295055.1_ASM429505v1_genomic.fna	Proteobacteria
GCA_004297765.1_ASM429776v1_genomic.fna	Chloroflexota
GCA_004298615.1_ASM429861v1_genomic.fna	Patescibacteria
GCA_004356005.1_ASM435600v1_genomic.fna	Acidobacteriota
GCA_004356135.1_ASM435613v1_genomic.fna	KSB1
GCA_004357005.1_ASM435700v1_genomic.fna	Proteobacteria
GCA_004374725.1_ASM437472v1_genomic.fna	Patescibacteria
GCA_004375785.1_ASM437578v1_genomic.fna	WOR-3
GCA_004376375.1_ASM437637v1_genomic.fna	Planctomycetota
GCA_004376575.1_ASM437657v1_genomic.fna	TA06
GCA_004377365.1_ASM437736v1_genomic.fna	Chloroflexota
GCA_004402895.1_ASM440289v1_genomic.fna	Marinisomatota
GCA_004525155.1_ASM452515v1_genomic.fna	Spirochaetota
GCA_004525935.1_ASM452593v1_genomic.fna	Verrucomicrobiota
GCA_004563595.2_ASM456359v2_genomic.fna	Patescibacteria
GCA_004796365.1_ASM479636v1_genomic.fna	Proteobacteria
GCA_005223075.1_ASM522307v1_genomic.fna	WOR-3
GCA_005239895.1_ASM523989v1_genomic.fna	Patescibacteria
GCA_005697565.1_ASM569756v1_genomic.fna	Patescibacteria
GCA_005881175.1_ASM588117v1_genomic.fna	Dormibacterota
GCA_005893165.1_ASM589316v1_genomic.fna	Eisenbacteria
GCA_006226305.1_ASM622630v1_genomic.fna	Proteobacteria
GCA_006844605.1_ASM684460v1_genomic.fna	Proteobacteria
GCA_007116075.1_ASM711607v1_genomic.fna	Spirochaetota
GCA_007118175.1_ASM711817v1_genomic.fna	Verrucomicrobiota
GCA_007118365.1_ASM711836v1_genomic.fna	Bacteroidota
GCA_007119245.1_ASM711924v1_genomic.fna	Firmicutes
GCA_007119435.1_ASM711943v1_genomic.fna	Proteobacteria
GCA_007120745.1_ASM712074v1_genomic.fna	Firmicutes
GCA_007121905.1_ASM712190v1_genomic.fna	Myxococcota
GCA_007122335.1_ASM712233v1_genomic.fna	Firmicutes
GCA_007127155.1_ASM712715v1_genomic.fna	Myxococcota
GCA_007127275.1_ASM712727v1_genomic.fna	Planctomycetota
GCA_007127285.1_ASM712728v1_genomic.fna	Planctomycetota
GCA_007131825.1_ASM713182v1_genomic.fna	Proteobacteria
GCA_007131925.1_ASM713192v1_genomic.fna	Planctomycetota
GCA_007132905.1_ASM713290v1_genomic.fna	SLNR01
GCA_007136165.1_ASM713616v1_genomic.fna	Firmicutes
GCA_007376705.1_ASM737670v1_genomic.fna	Patescibacteria
GCA_007693855.1_ASM769385v1_genomic.fna	Proteobacteria
GCA_007748055.1_ASM774805v1_genomic.fna	Planctomycetota
GCA_007748075.1_ASM774807v1_genomic.fna	Planctomycetota
GCA_007748095.1_ASM774809v1_genomic.fna	Planctomycetota
GCA_007993755.1_ASM799375v1_genomic.fna	Myxococcota
GCA_008081395.1_ASM808139v1_genomic.fna	Proteobacteria
GCA_008501735.1_ASM850173v1_genomic.fna	CLD3
GCA_008975185.1_ASM897518v1_genomic.fna	Proteobacteria
GCA_009002475.1_ASM900247v1_genomic.fna	Planctomycetota
GCA_009377375.1_ASM937737v1_genomic.fna	Proteobacteria
GCA_009377665.1_ASM937766v1_genomic.fna	Chloroflexota
GCA_009377715.1_ASM937771v1_genomic.fna	Chloroflexota
GCA_009377745.1_ASM937774v1_genomic.fna	Chloroflexota
GCA_009692865.1_ASM969286v1_genomic.fna	Chloroflexota
GCA_009693105.1_ASM969310v1_genomic.fna	Chloroflexota
GCA_009693995.1_ASM969399v1_genomic.fna	Proteobacteria
GCA_009694125.1_ASM969412v1_genomic.fna	Proteobacteria
GCA_009694185.1_ASM969418v1_genomic.fna	Proteobacteria
GCA_009694805.1_ASM969480v1_genomic.fna	Latescibacterota
GCA_009694835.1_ASM969483v1_genomic.fna	Patescibacteria
GCA_009773435.1_ASM977343v1_genomic.fna	Proteobacteria
GCA_009773495.1_ASM977349v1_genomic.fna	Firmicutes
GCA_009777515.1_ASM977751v1_genomic.fna	Firmicutes
GCA_009780035.1_ASM978003v1_genomic.fna	Proteobacteria
GCA_009783805.1_ASM978380v1_genomic.fna	Firmicutes
GCA_009835345.1_ASM983534v1_genomic.fna	Chloroflexota
GCA_009835595.1_ASM983559v1_genomic.fna	Proteobacteria
GCA_009835705.1_ASM983570v1_genomic.fna	Chloroflexota
GCA_009837045.1_ASM983704v1_genomic.fna	Acidobacteriota
GCA_009839835.1_ASM983983v1_genomic.fna	Patescibacteria
GCA_009843005.1_ASM984300v1_genomic.fna	Proteobacteria
GCA_009885355.1_ASM988535v1_genomic.fna	Patescibacteria
GCA_009905215.1_ASM990521v1_genomic.fna	Verrucomicrobiota
GCA_009929845.1_ASM992984v1_genomic.fna	Verrucomicrobiota
GCA_009937385.1_ASM993738v1_genomic.fna	Proteobacteria
GCA_009991555.1_ASM999155v1_genomic.fna	Patescibacteria
GCA_009991595.1_ASM999159v1_genomic.fna	Bdellovibrionota
GCA_009992855.1_ASM999285v1_genomic.fna	Armatimonadota
GCA_009993275.1_ASM999327v1_genomic.fna	CG2-30-70-394
GCA_009993385.1_ASM999338v1_genomic.fna	Armatimonadota
GCA_009993695.1_ASM999369v1_genomic.fna	Patescibacteria
GCA_009995545.1_ASM999554v1_genomic.fna	Patescibacteria
GCA_011041825.1_ASM1104182v1_genomic.fna	Chloroflexota
GCA_011043375.1_ASM1104337v1_genomic.fna	Thermotogota
GCA_011046395.1_ASM1104639v1_genomic.fna	Desulfobacterota
GCA_011052255.1_ASM1105225v1_genomic.fna	Proteobacteria
GCA_011064725.1_ASM1106472v1_genomic.fna	Chlamydiota
GCA_011087785.1_ASM1108778v1_genomic.fna	Verrucomicrobiota
GCA_011087955.1_ASM1108795v1_genomic.fna	Bdellovibrionota
GCA_011088225.1_ASM1108822v1_genomic.fna	Acidobacteriota
GCA_011170395.1_ASM1117039v1_genomic.fna	Chloroflexota
GCA_011375345.1_ASM1137534v1_genomic.fna	Proteobacteria
GCA_011523425.1_ASM1152342v1_genomic.fna	Proteobacteria
GCA_011523505.1_ASM1152350v1_genomic.fna	Proteobacteria
GCA_011523655.1_ASM1152365v1_genomic.fna	Proteobacteria
GCA_011523785.1_ASM1152378v1_genomic.fna	Chloroflexota
GCA_011524535.1_ASM1152453v1_genomic.fna	Spirochaetota
GCA_011620135.1_ASM1162013v1_genomic.fna	Proteobacteria
GCA_011620345.1_ASM1162034v1_genomic.fna	UBA2233
GCA_011682385.1_ASM1168238v1_genomic.fna	Planctomycetota
GCA_011771205.1_ASM1177120v1_genomic.fna	UBA6262
GCA_011771495.1_ASM1177149v1_genomic.fna	Proteobacteria
GCA_011771525.1_ASM1177152v1_genomic.fna	Armatimonadota
GCA_011772845.1_ASM1177284v1_genomic.fna	Desulfobacterota
GCA_011773445.1_ASM1177344v1_genomic.fna	Desulfobacterota
GCA_011773985.1_ASM1177398v1_genomic.fna	RBG-13-66-14
GCA_011777135.1_ASM1177713v1_genomic.fna	Zixibacteria
GCA_012103495.1_ASM1210349v1_genomic.fna	Proteobacteria
GCA_012267605.1_ASM1226760v1_genomic.fna	Proteobacteria
GCA_012270555.1_ASM1227055v1_genomic.fna	Chloroflexota
GCA_012270635.1_ASM1227063v1_genomic.fna	Chloroflexota
GCA_012270675.1_ASM1227067v1_genomic.fna	Latescibacterota
GCA_012270965.1_ASM1227096v1_genomic.fna	Gemmatimonadota
GCA_012270975.1_ASM1227097v1_genomic.fna	JAAXHH01
GCA_012271025.1_ASM1227102v1_genomic.fna	Desulfobacterota
GCA_012271225.1_ASM1227122v1_genomic.fna	Chloroflexota
GCA_012271265.1_ASM1227126v1_genomic.fna	Acidobacteriota
GCA_012514615.1_ASM1251461v1_genomic.fna	Chloroflexota
GCA_012516115.1_ASM1251611v1_genomic.fna	Firmicutes
GCA_012517755.1_ASM1251775v1_genomic.fna	Caldisericota
GCA_012522585.1_ASM1252258v1_genomic.fna	Firmicutes
GCA_012523975.1_ASM1252397v1_genomic.fna	Firmicutes
GCA_012689325.1_ASM1268932v1_genomic.fna	Chloroflexota
GCA_012744235.1_ASM1274423v1_genomic.fna	Firmicutes
GCA_012799075.1_ASM1279907v1_genomic.fna	Firmicutes
GCA_012837285.1_ASM1283728v1_genomic.fna	DTU030
GCA_012838615.1_ASM1283861v1_genomic.fna	Firmicutes
GCA_012839765.1_ASM1283976v1_genomic.fna	Firmicutes
GCA_012840015.1_ASM1284001v1_genomic.fna	Firmicutes
GCA_012840065.1_ASM1284006v1_genomic.fna	Firmicutes
GCA_012842575.1_ASM1284257v1_genomic.fna	Firmicutes
GCA_012926505.1_ASM1292650v1_genomic.fna	Proteobacteria
GCA_012959605.1_ASM1295960v1_genomic.fna	Chloroflexota
GCA_012960725.1_ASM1296072v1_genomic.fna	Proteobacteria
GCA_012961745.1_ASM1296174v1_genomic.fna	Verrucomicrobiota
GCA_012961755.1_ASM1296175v1_genomic.fna	Latescibacterota
GCA_012962595.1_ASM1296259v1_genomic.fna	Desulfobacterota
GCA_012963885.1_ASM1296388v1_genomic.fna	Poribacteria
GCA_012963965.1_ASM1296396v1_genomic.fna	Proteobacteria
GCA_012964075.1_ASM1296407v1_genomic.fna	Proteobacteria
GCA_012965485.1_ASM1296548v1_genomic.fna	Chloroflexota
GCA_012974295.1_ASM1297429v1_genomic.fna	Chloroflexota
GCA_013003115.1_ASM1300311v1_genomic.fna	Proteobacteria
GCA_013003415.1_ASM1300341v1_genomic.fna	Eisenbacteria
GCA_013043995.1_ASM1304399v1_genomic.fna	Spirochaetota
GCA_013139225.1_ASM1313922v1_genomic.fna	Desulfobacterota
GCA_013150955.1_ASM1315095v1_genomic.fna	Calditrichota
GCA_013151035.1_ASM1315103v1_genomic.fna	Proteobacteria
GCA_013151045.1_ASM1315104v1_genomic.fna	Proteobacteria
GCA_013151235.1_ASM1315123v1_genomic.fna	CG2-30-53-67
GCA_013151355.1_ASM1315135v1_genomic.fna	Proteobacteria
GCA_013151415.1_ASM1315141v1_genomic.fna	Chloroflexota
GCA_013151445.1_ASM1315144v1_genomic.fna	Actinobacteriota
GCA_013151555.1_ASM1315155v1_genomic.fna	NPL-UPA2
GCA_013151735.1_ASM1315173v1_genomic.fna	JdFR-76
GCA_013151745.1_ASM1315174v1_genomic.fna	Proteobacteria
GCA_013151795.1_ASM1315179v1_genomic.fna	Proteobacteria
GCA_013151965.1_ASM1315196v1_genomic.fna	Spirochaetota
GCA_013152105.1_ASM1315210v1_genomic.fna	Myxococcota
GCA_013152135.1_ASM1315213v1_genomic.fna	Bacteroidota
GCA_013152165.1_ASM1315216v1_genomic.fna	Patescibacteria
GCA_013152225.1_ASM1315222v1_genomic.fna	KSB1
GCA_013152295.1_ASM1315229v1_genomic.fna	Proteobacteria
GCA_013152435.1_ASM1315243v1_genomic.fna	Chloroflexota
GCA_013152475.1_ASM1315247v1_genomic.fna	Planctomycetota
GCA_013152715.1_ASM1315271v1_genomic.fna	KSB1
GCA_013152765.1_ASM1315276v1_genomic.fna	KSB1
GCA_013152825.1_ASM1315282v1_genomic.fna	CAIJMQ01
GCA_013152945.1_ASM1315294v1_genomic.fna	Myxococcota
GCA_013152955.1_ASM1315295v1_genomic.fna	Campylobacterota
GCA_013178015.1_ASM1317801v1_genomic.fna	Chloroflexota
GCA_013178045.1_ASM1317804v1_genomic.fna	Firmicutes
GCA_013178125.1_ASM1317812v1_genomic.fna	Firmicutes
GCA_013202185.1_ASM1320218v1_genomic.fna	Planctomycetota
GCA_013203355.1_ASM1320335v1_genomic.fna	Omnitrophota
GCA_013213915.1_ASM1321391v1_genomic.fna	Planctomycetota
GCA_013215565.1_ASM1321556v1_genomic.fna	Myxococcota
GCA_013215865.1_ASM1321586v1_genomic.fna	Margulisbacteria
GCA_013215875.1_ASM1321587v1_genomic.fna	Verrucomicrobiota
GCA_013215905.1_ASM1321590v1_genomic.fna	Proteobacteria
GCA_013282075.1_ASM1328207v1_genomic.fna	Actinobacteriota
GCA_013285485.1_ASM1328548v1_genomic.fna	Proteobacteria
GCA_013285725.1_ASM1328572v1_genomic.fna	Proteobacteria
GCA_013285995.1_ASM1328599v1_genomic.fna	Proteobacteria
GCA_013286205.1_ASM1328620v1_genomic.fna	FCPU426
GCA_013286365.1_ASM1328636v1_genomic.fna	Proteobacteria
GCA_013286945.1_ASM1328694v1_genomic.fna	Eremiobacterota
GCA_013287405.1_ASM1328740v1_genomic.fna	Bdellovibrionota
GCA_013288215.1_ASM1328821v1_genomic.fna	Verrucomicrobiota
GCA_013289145.1_ASM1328914v1_genomic.fna	Proteobacteria
GCA_013298875.1_ASM1329887v1_genomic.fna	Cyanobacteria
GCA_013314755.1_ASM1331475v1_genomic.fna	Armatimonadota
GCA_013335095.1_ASM1333509v1_genomic.fna	Patescibacteria
GCA_013335425.1_ASM1333542v1_genomic.fna	FCPU426
GCA_013348725.1_ASM1334872v1_genomic.fna	Proteobacteria
GCA_013348845.1_ASM1334884v1_genomic.fna	Bacteroidota
GCA_013360285.1_ASM1336028v1_genomic.fna	Myxococcota
GCA_013373515.1_ASM1337351v1_genomic.fna	Proteobacteria
GCA_013374135.1_ASM1337413v1_genomic.fna	Desulfobacterota
GCA_013375375.1_ASM1337537v1_genomic.fna	Desulfobacterota
GCA_013389075.1_ASM1338907v1_genomic.fna	Proteobacteria
GCA_013414725.1_ASM1341472v1_genomic.fna	Proteobacteria
GCA_013414795.1_ASM1341479v1_genomic.fna	Bacteroidota
GCA_013426755.1_ASM1342675v1_genomic.fna	Spirochaetota
GCA_013619085.1_ASM1361908v1_genomic.fna	Desulfobacterota
GCA_013626165.1_ASM1362616v1_genomic.fna	Omnitrophota
GCA_013693795.1_ASM1369379v1_genomic.fna	Chloroflexota
GCA_013695765.1_ASM1369576v1_genomic.fna	Proteobacteria
GCA_013696235.1_ASM1369623v1_genomic.fna	Actinobacteriota
GCA_013696835.1_ASM1369683v1_genomic.fna	Gemmatimonadota
GCA_013698395.1_ASM1369839v1_genomic.fna	Actinobacteriota
GCA_013816105.1_ASM1381610v1_genomic.fna	Actinobacteriota
GCA_013816405.1_ASM1381640v1_genomic.fna	Chloroflexota
GCA_013817245.1_ASM1381724v1_genomic.fna	Proteobacteria
GCA_013817465.1_ASM1381746v1_genomic.fna	Proteobacteria
GCA_014023125.1_ASM1402312v1_genomic.fna	Firmicutes
GCA_014075255.1_ASM1407525v1_genomic.fna	Proteobacteria
GCA_014075295.1_ASM1407529v1_genomic.fna	Desulfobacterota
GCA_014155705.1_ASM1415570v1_genomic.fna	Chloroflexota
GCA_014237925.1_ASM1423792v1_genomic.fna	Proteobacteria
GCA_014238345.1_ASM1423834v1_genomic.fna	Proteobacteria
GCA_014238985.1_ASM1423898v1_genomic.fna	Proteobacteria
GCA_014239265.1_ASM1423926v1_genomic.fna	Actinobacteriota
GCA_014239685.1_ASM1423968v1_genomic.fna	Chloroflexota
GCA_014304855.1_ASM1430485v1_genomic.fna	Eremiobacterota
GCA_014304865.1_ASM1430486v1_genomic.fna	Eremiobacterota
GCA_014323835.1_ASM1432383v1_genomic.fna	Proteobacteria
GCA_014323865.1_ASM1432386v1_genomic.fna	Proteobacteria
GCA_014323925.1_ASM1432392v1_genomic.fna	Proteobacteria
GCA_014338045.1_ASM1433804v1_genomic.fna	KSB1
GCA_014360055.1_ASM1436005v1_genomic.fna	Firmicutes
GCA_014360195.1_ASM1436019v1_genomic.fna	Firmicutes
GCA_014360295.1_ASM1436029v1_genomic.fna	Synergistota
GCA_014360465.1_ASM1436046v1_genomic.fna	JACIXR01
GCA_014360755.1_ASM1436075v1_genomic.fna	Chloroflexota
GCA_014360845.1_ASM1436084v1_genomic.fna	Chloroflexota
GCA_014360855.1_ASM1436085v1_genomic.fna	Chloroflexota
GCA_014376695.1_ASM1437669v1_genomic.fna	Patescibacteria
GCA_014377495.1_ASM1437749v1_genomic.fna	Cyanobacteria
GCA_014382085.1_ASM1438208v1_genomic.fna	Krumholzibacteriota
GCA_014382245.1_ASM1438224v1_genomic.fna	Desulfobacterota
GCA_014383605.1_ASM1438360v1_genomic.fna	Chloroflexota
GCA_014384515.1_ASM1438451v1_genomic.fna	Chloroflexota
GCA_014384545.1_ASM1438454v1_genomic.fna	UBP7
GCA_014384785.1_ASM1438478v1_genomic.fna	Firmicutes
GCA_014385105.1_ASM1438510v1_genomic.fna	Firmicutes
GCA_014730235.1_ASM1473023v1_genomic.fna	Poribacteria
GCA_014762485.1_ASM1476248v1_genomic.fna	Proteobacteria
GCA_014762505.1_ASM1476250v1_genomic.fna	Proteobacteria
GCA_014859225.1_ASM1485922v1_genomic.fna	Aerophobota
GCA_014874485.1_ASM1487448v1_genomic.fna	Chloroflexota
GCA_014896355.1_ASM1489635v1_genomic.fna	Firmicutes
GCA_014896485.1_ASM1489648v1_genomic.fna	Firmicutes
GCA_014896945.1_ASM1489694v1_genomic.fna	Proteobacteria
GCA_015068525.1_ASM1506852v1_genomic.fna	Firmicutes
GCA_015068735.1_ASM1506873v1_genomic.fna	Firmicutes
GCA_015068925.1_ASM1506892v1_genomic.fna	Firmicutes
GCA_015069135.1_ASM1506913v1_genomic.fna	Firmicutes
GCA_015075175.1_ASM1507517v1_genomic.fna	OLB16
GCA_015163845.1_ASM1516384v1_genomic.fna	Proteobacteria
GCA_015222555.1_ASM1522255v1_genomic.fna	Desulfobacterota
GCA_015231345.1_ASM1523134v1_genomic.fna	Planctomycetota
GCA_015231405.1_ASM1523140v1_genomic.fna	Omnitrophota
GCA_015231815.1_ASM1523181v1_genomic.fna	Nitrospinota
GCA_015232855.1_ASM1523285v1_genomic.fna	Fibrobacterota
GCA_015233055.1_ASM1523305v1_genomic.fna	Desulfobacterota
GCA_015233135.1_ASM1523313v1_genomic.fna	UBA10199
GCA_015278115.1_UQ_AqS3_2_genomic.fna	Proteobacteria
GCA_015278175.1_UQ_AqS2_2_genomic.fna	Proteobacteria
GCA_015484715.1_ASM1548471v1_genomic.fna	Chloroflexota
GCA_015484945.1_ASM1548494v1_genomic.fna	Proteobacteria
GCA_015485145.1_ASM1548514v1_genomic.fna	Proteobacteria
GCA_015485655.1_ASM1548565v1_genomic.fna	Patescibacteria
GCA_015486055.1_ASM1548605v1_genomic.fna	Acidobacteriota
GCA_015486095.1_ASM1548609v1_genomic.fna	Thermotogota
GCA_015486235.1_ASM1548623v1_genomic.fna	Chloroflexota
GCA_015486285.1_ASM1548628v1_genomic.fna	Desulfobacterota
GCA_015486655.1_ASM1548665v1_genomic.fna	WOR-3
GCA_015486685.1_ASM1548668v1_genomic.fna	WOR-3
GCA_015486815.1_ASM1548681v1_genomic.fna	Planctomycetota
GCA_015486845.1_ASM1548684v1_genomic.fna	Chloroflexota
GCA_015486855.1_ASM1548685v1_genomic.fna	Spirochaetota
GCA_015487785.1_ASM1548778v1_genomic.fna	Proteobacteria
GCA_015487895.1_ASM1548789v1_genomic.fna	Proteobacteria
GCA_015488555.1_ASM1548855v1_genomic.fna	Proteobacteria
GCA_015489295.1_ASM1548929v1_genomic.fna	WOR-3
GCA_015490255.1_ASM1549025v1_genomic.fna	WOR-3
GCA_015490395.1_ASM1549039v1_genomic.fna	Proteobacteria
GCA_015490475.1_ASM1549047v1_genomic.fna	Bacteroidota
GCA_015491535.1_ASM1549153v1_genomic.fna	Desulfobacterota
GCA_015492395.1_ASM1549239v1_genomic.fna	Desulfobacterota
GCA_015493505.1_ASM1549350v1_genomic.fna	Desulfobacterota
GCA_015494465.1_ASM1549446v1_genomic.fna	Omnitrophota
GCA_015660425.1_ASM1566042v1_genomic.fna	Proteobacteria
GCA_015661045.1_ASM1566104v1_genomic.fna	Chloroflexota
GCA_015661155.1_ASM1566115v1_genomic.fna	Chloroflexota
GCA_015662515.1_ASM1566251v1_genomic.fna	Proteobacteria
GCA_015709575.1_ASM1570957v1_genomic.fna	Planctomycetota
GCA_015709695.1_ASM1570969v1_genomic.fna	Proteobacteria
GCA_015711755.1_ASM1571175v1_genomic.fna	Actinobacteriota
GCA_015711795.1_ASM1571179v1_genomic.fna	Actinobacteriota
GCA_016124315.1_ASM1612431v1_genomic.fna	Proteobacteria
GCA_016124415.1_ASM1612441v1_genomic.fna	Proteobacteria
GCA_016125005.1_ASM1612500v1_genomic.fna	Sumerlaeota
GCA_016176845.1_ASM1617684v1_genomic.fna	Nitrospinota
GCA_016177145.1_ASM1617714v1_genomic.fna	Omnitrophota
GCA_016177865.1_ASM1617786v1_genomic.fna	Methylomirabilota
GCA_016178005.1_ASM1617800v1_genomic.fna	JACPWU01
GCA_016178225.1_ASM1617822v1_genomic.fna	Bdellovibrionota
GCA_016178265.1_ASM1617826v1_genomic.fna	Cyanobacteria
GCA_016178505.1_ASM1617850v1_genomic.fna	Planctomycetota
GCA_016178565.1_ASM1617856v1_genomic.fna	Nitrospirota
GCA_016178915.1_ASM1617891v1_genomic.fna	Proteobacteria
GCA_016179055.1_ASM1617905v1_genomic.fna	Acidobacteriota
GCA_016179685.1_ASM1617968v1_genomic.fna	Planctomycetota
GCA_016179785.1_ASM1617978v1_genomic.fna	Omnitrophota
GCA_016180425.1_ASM1618042v1_genomic.fna	Elusimicrobiota
GCA_016180645.1_ASM1618064v1_genomic.fna	JACPQY01
GCA_016180815.1_ASM1618081v1_genomic.fna	Elusimicrobiota
GCA_016180865.1_ASM1618086v1_genomic.fna	UBA10199
GCA_016182335.1_ASM1618233v1_genomic.fna	Bdellovibrionota
GCA_016182365.1_ASM1618236v1_genomic.fna	Patescibacteria
GCA_016182435.1_ASM1618243v1_genomic.fna	Verrucomicrobiota
GCA_016182525.1_ASM1618252v1_genomic.fna	Patescibacteria
GCA_016182555.1_ASM1618255v1_genomic.fna	Patescibacteria
GCA_016182705.1_ASM1618270v1_genomic.fna	Desulfobacterota
GCA_016183025.1_ASM1618302v1_genomic.fna	Desulfobacterota
GCA_016183175.1_ASM1618317v1_genomic.fna	UBA10199
GCA_016183405.1_ASM1618340v1_genomic.fna	Chloroflexota
GCA_016183425.1_ASM1618342v1_genomic.fna	Chloroflexota
GCA_016183835.1_ASM1618383v1_genomic.fna	Armatimonadota
GCA_016183865.1_ASM1618386v1_genomic.fna	Eremiobacterota
GCA_016183885.1_ASM1618388v1_genomic.fna	Eremiobacterota
GCA_016184115.1_ASM1618411v1_genomic.fna	Acidobacteriota
GCA_016186045.1_ASM1618604v1_genomic.fna	Patescibacteria
GCA_016186165.1_ASM1618616v1_genomic.fna	Bdellovibrionota
GCA_016187225.1_ASM1618722v1_genomic.fna	Patescibacteria
GCA_016187725.1_ASM1618772v1_genomic.fna	Latescibacterota
GCA_016187835.1_ASM1618783v1_genomic.fna	Desulfobacterota
GCA_016188355.1_ASM1618835v1_genomic.fna	Patescibacteria
GCA_016188575.1_ASM1618857v1_genomic.fna	CSSED10-310
GCA_016188765.1_ASM1618876v1_genomic.fna	Patescibacteria
GCA_016188775.1_ASM1618877v1_genomic.fna	Patescibacteria
GCA_016188835.1_ASM1618883v1_genomic.fna	Patescibacteria
GCA_016188915.1_ASM1618891v1_genomic.fna	Patescibacteria
GCA_016189825.1_ASM1618982v1_genomic.fna	Chloroflexota
GCA_016189835.1_ASM1618983v1_genomic.fna	Desulfobacterota
GCA_016190025.1_ASM1619002v1_genomic.fna	UBA8248
GCA_016190205.1_ASM1619020v1_genomic.fna	Omnitrophota
GCA_016190305.1_ASM1619030v1_genomic.fna	Firmicutes
GCA_016190375.1_ASM1619037v1_genomic.fna	Myxococcota
GCA_016190445.1_ASM1619044v1_genomic.fna	Chloroflexota
GCA_016190505.1_ASM1619050v1_genomic.fna	Chloroflexota
GCA_016190625.1_ASM1619062v1_genomic.fna	Chloroflexota
GCA_016190665.1_ASM1619066v1_genomic.fna	Chloroflexota
GCA_016190815.1_ASM1619081v1_genomic.fna	Chloroflexota
GCA_016191015.1_ASM1619101v1_genomic.fna	Acidobacteriota
GCA_016191235.1_ASM1619123v1_genomic.fna	Proteobacteria
GCA_016191285.1_ASM1619128v1_genomic.fna	Proteobacteria
GCA_016191335.1_ASM1619133v1_genomic.fna	Elusimicrobiota
GCA_016191385.1_ASM1619138v1_genomic.fna	Chloroflexota
GCA_016192455.1_ASM1619245v1_genomic.fna	JACPUC01
GCA_016192525.1_ASM1619252v1_genomic.fna	Planctomycetota
GCA_016192705.1_ASM1619270v1_genomic.fna	Myxococcota
GCA_016193065.1_ASM1619306v1_genomic.fna	JACPSX01
GCA_016193565.1_ASM1619356v1_genomic.fna	CSP1-3
GCA_016194375.1_ASM1619437v1_genomic.fna	Nitrospinota
GCA_016195325.1_ASM1619532v1_genomic.fna	Acidobacteriota
GCA_016195615.1_ASM1619561v1_genomic.fna	Patescibacteria
GCA_016195665.1_ASM1619566v1_genomic.fna	Proteobacteria
GCA_016196625.1_ASM1619662v1_genomic.fna	Patescibacteria
GCA_016199255.1_ASM1619925v1_genomic.fna	Deinococcota
GCA_016199325.1_ASM1619932v1_genomic.fna	Chloroflexota
GCA_016199375.1_ASM1619937v1_genomic.fna	Chloroflexota
GCA_016199525.1_ASM1619952v1_genomic.fna	Armatimonadota
GCA_016199585.1_ASM1619958v1_genomic.fna	Armatimonadota
GCA_016199665.1_ASM1619966v1_genomic.fna	Acidobacteriota
GCA_016199905.1_ASM1619990v1_genomic.fna	UBP17
GCA_016200125.1_ASM1620012v1_genomic.fna	Planctomycetota
GCA_016200135.1_ASM1620013v1_genomic.fna	Planctomycetota
GCA_016200255.1_ASM1620025v1_genomic.fna	Nitrospirota
GCA_016200445.1_ASM1620044v1_genomic.fna	Proteobacteria
GCA_016200545.1_ASM1620054v1_genomic.fna	Desulfobacterota
GCA_016200585.1_ASM1620058v1_genomic.fna	Desulfobacterota
GCA_016200725.1_ASM1620072v1_genomic.fna	Chloroflexota
GCA_016200955.1_ASM1620095v1_genomic.fna	Planctomycetota
GCA_016201765.1_ASM1620176v1_genomic.fna	Nitrospirota
GCA_016202395.1_ASM1620239v1_genomic.fna	JACQOV01
GCA_016202695.1_ASM1620269v1_genomic.fna	Proteobacteria
GCA_016203935.1_ASM1620393v1_genomic.fna	Patescibacteria
GCA_016204975.1_ASM1620497v1_genomic.fna	Elusimicrobiota
GCA_016205045.1_ASM1620504v1_genomic.fna	Elusimicrobiota
GCA_016205125.1_ASM1620512v1_genomic.fna	Bdellovibrionota
GCA_016206165.1_ASM1620616v1_genomic.fna	Patescibacteria
GCA_016206515.1_ASM1620651v1_genomic.fna	Planctomycetota
GCA_016206785.1_ASM1620678v1_genomic.fna	Omnitrophota
GCA_016206925.1_ASM1620692v1_genomic.fna	Omnitrophota
GCA_016207405.1_ASM1620740v1_genomic.fna	Proteobacteria
GCA_016207825.1_ASM1620782v1_genomic.fna	Planctomycetota
GCA_016207865.1_ASM1620786v1_genomic.fna	Nitrospirota
GCA_016207925.1_ASM1620792v1_genomic.fna	Nitrospinota
GCA_016208165.1_ASM1620816v1_genomic.fna	Desulfobacterota
GCA_016208205.1_ASM1620820v1_genomic.fna	UBA9089
GCA_016208255.1_ASM1620825v1_genomic.fna	Desulfobacterota
GCA_016208315.1_ASM1620831v1_genomic.fna	Chloroflexota
GCA_016208345.1_ASM1620834v1_genomic.fna	Chloroflexota
GCA_016208465.1_ASM1620846v1_genomic.fna	Actinobacteriota
GCA_016208485.1_ASM1620848v1_genomic.fna	Actinobacteriota
GCA_016208615.1_ASM1620861v1_genomic.fna	WOR-3
GCA_016208665.1_ASM1620866v1_genomic.fna	Krumholzibacteriota
GCA_016208745.1_ASM1620874v1_genomic.fna	Patescibacteria
GCA_016209005.1_ASM1620900v1_genomic.fna	Patescibacteria
GCA_016209155.1_ASM1620915v1_genomic.fna	JACRDZ01
GCA_016209225.1_ASM1620922v1_genomic.fna	Desulfobacterota
GCA_016209495.1_ASM1620949v1_genomic.fna	Planctomycetota
GCA_016209585.1_ASM1620958v1_genomic.fna	Planctomycetota
GCA_016209595.1_ASM1620959v1_genomic.fna	Planctomycetota
GCA_016210205.1_ASM1621020v1_genomic.fna	Chloroflexota
GCA_016210425.1_ASM1621042v1_genomic.fna	Chloroflexota
GCA_016210485.1_ASM1621048v1_genomic.fna	Chloroflexota
GCA_016210565.1_ASM1621056v1_genomic.fna	Chloroflexota
GCA_016210665.1_ASM1621066v1_genomic.fna	Chloroflexota
GCA_016210705.1_ASM1621070v1_genomic.fna	Chloroflexota
GCA_016210925.1_ASM1621092v1_genomic.fna	Acidobacteriota
GCA_016210985.1_ASM1621098v1_genomic.fna	Acidobacteriota
GCA_016212085.1_ASM1621208v1_genomic.fna	Nitrospirota
GCA_016212095.1_ASM1621209v1_genomic.fna	Nitrospirota
GCA_016212195.1_ASM1621219v1_genomic.fna	Nitrospirota
GCA_016212295.1_ASM1621229v1_genomic.fna	Nitrospinota
GCA_016212345.1_ASM1621234v1_genomic.fna	Nitrospinota
GCA_016213895.1_ASM1621389v1_genomic.fna	Planctomycetota
GCA_016213925.1_ASM1621392v1_genomic.fna	Omnitrophota
GCA_016214265.1_ASM1621426v1_genomic.fna	Omnitrophota
GCA_016214375.1_ASM1621437v1_genomic.fna	Nitrospirota
GCA_016214425.1_ASM1621442v1_genomic.fna	Nitrospirota
GCA_016214925.1_ASM1621492v1_genomic.fna	Proteobacteria
GCA_016214995.1_ASM1621499v1_genomic.fna	Desulfobacterota
GCA_016215325.1_ASM1621532v1_genomic.fna	Patescibacteria
GCA_016215705.1_ASM1621570v1_genomic.fna	Abyssubacteria
GCA_016217625.1_ASM1621762v1_genomic.fna	Nitrospirota
GCA_016218365.1_ASM1621836v1_genomic.fna	Proteobacteria
GCA_016218485.1_ASM1621848v1_genomic.fna	Patescibacteria
GCA_016218785.1_ASM1621878v1_genomic.fna	Myxococcota
GCA_016218805.1_ASM1621880v1_genomic.fna	Myxococcota
GCA_016218965.1_ASM1621896v1_genomic.fna	Myxococcota
GCA_016222885.1_ASM1622288v1_genomic.fna	Nitrospirota
GCA_016223045.1_ASM1622304v1_genomic.fna	Eisenbacteria
GCA_016223205.1_ASM1622320v1_genomic.fna	Margulisbacteria
GCA_016234185.1_ASM1623418v1_genomic.fna	Nitrospirota
GCA_016235055.1_ASM1623505v1_genomic.fna	Chloroflexota
GCA_016235065.1_ASM1623506v1_genomic.fna	Actinobacteriota
GCA_016235085.1_ASM1623508v1_genomic.fna	Zixibacteria
GCA_016235155.1_ASM1623515v1_genomic.fna	Planctomycetota
GCA_016235675.1_ASM1623567v1_genomic.fna	SZUA-182
GCA_016278515.1_ASM1627851v1_genomic.fna	Firmicutes
GCA_016283195.1_ASM1628319v1_genomic.fna	Myxococcota
GCA_016288255.1_ASM1628825v1_genomic.fna	Firmicutes
GCA_016432245.1_ASM1643224v1_genomic.fna	Myxococcota
GCA_016432345.1_ASM1643234v1_genomic.fna	Patescibacteria
GCA_016432405.1_ASM1643240v1_genomic.fna	Patescibacteria
GCA_016432425.1_ASM1643242v1_genomic.fna	Patescibacteria
GCA_016432465.1_ASM1643246v1_genomic.fna	Patescibacteria
GCA_016432565.1_ASM1643256v1_genomic.fna	Patescibacteria
GCA_016464725.1_ASM1646472v1_genomic.fna	Dormibacterota
GCA_016464795.1_ASM1646479v1_genomic.fna	Dormibacterota
GCA_016649875.1_ASM1664987v1_genomic.fna	Actinobacteriota
GCA_016699105.1_ASM1669910v1_genomic.fna	Patescibacteria
GCA_016699145.1_ASM1669914v1_genomic.fna	Patescibacteria
GCA_016699165.1_ASM1669916v1_genomic.fna	Cyanobacteria
GCA_016699205.1_ASM1669920v1_genomic.fna	Patescibacteria
GCA_016699265.1_ASM1669926v1_genomic.fna	Patescibacteria
GCA_016699305.1_ASM1669930v1_genomic.fna	Proteobacteria
GCA_016699385.1_ASM1669938v1_genomic.fna	Patescibacteria
GCA_016699405.1_ASM1669940v1_genomic.fna	Acidobacteriota
GCA_016699445.1_ASM1669944v1_genomic.fna	UBA10199
GCA_016699515.1_ASM1669951v1_genomic.fna	Patescibacteria
GCA_016699595.1_ASM1669959v1_genomic.fna	Patescibacteria
GCA_016699635.1_ASM1669963v1_genomic.fna	Bacteroidota
GCA_016699655.1_ASM1669965v1_genomic.fna	Fibrobacterota
GCA_016699755.1_ASM1669975v1_genomic.fna	Patescibacteria
GCA_016699775.1_ASM1669977v1_genomic.fna	Patescibacteria
GCA_016699995.1_ASM1669999v1_genomic.fna	Patescibacteria
GCA_016700035.1_ASM1670003v1_genomic.fna	Patescibacteria
GCA_016700095.1_ASM1670009v1_genomic.fna	Patescibacteria
GCA_016700195.1_ASM1670019v1_genomic.fna	Acidobacteriota
GCA_016700335.1_ASM1670033v1_genomic.fna	Bacteroidota
GCA_016703535.1_ASM1670353v1_genomic.fna	Myxococcota
GCA_016708315.1_ASM1670831v1_genomic.fna	Zixibacteria
GCA_016712635.1_ASM1671263v1_genomic.fna	Proteobacteria
GCA_016713535.1_ASM1671353v1_genomic.fna	JADJOY01
GCA_016744065.1_ASM1674406v1_genomic.fna	Proteobacteria
GCA_016763665.1_ASM1676366v1_genomic.fna	Bacteroidota
GCA_016781115.1_ASM1678111v1_genomic.fna	Actinobacteriota
GCA_016782545.1_ASM1678254v1_genomic.fna	Patescibacteria
GCA_016783345.1_ASM1678334v1_genomic.fna	BS750m-G34
GCA_016783505.1_ASM1678350v1_genomic.fna	BS750m-G25
GCA_016783555.1_ASM1678355v1_genomic.fna	Omnitrophota
GCA_016783645.1_ASM1678364v1_genomic.fna	AABM5-125-24
GCA_016784265.1_ASM1678426v1_genomic.fna	Marinisomatota
GCA_016784425.1_ASM1678442v1_genomic.fna	Delongbacteria
GCA_016788215.1_ASM1678821v1_genomic.fna	CLD3
GCA_016788825.1_ASM1678882v1_genomic.fna	Patescibacteria
GCA_016792605.1_ASM1679260v1_genomic.fna	Proteobacteria
GCA_016793965.1_ASM1679396v1_genomic.fna	Proteobacteria
GCA_016794225.1_ASM1679422v1_genomic.fna	Proteobacteria
GCA_016795345.1_ASM1679534v1_genomic.fna	Planctomycetota
GCA_016841065.1_ASM1684106v1_genomic.fna	Actinobacteriota
GCA_016841135.1_ASM1684113v1_genomic.fna	Firmicutes
GCA_016841605.1_ASM1684160v1_genomic.fna	Firmicutes
GCA_016844365.1_ASM1684436v1_genomic.fna	Chloroflexota
GCA_016844425.1_ASM1684442v1_genomic.fna	Bacteroidota
GCA_016844485.1_ASM1684448v1_genomic.fna	Proteobacteria
GCA_016844545.1_ASM1684454v1_genomic.fna	Desulfobacterota
GCA_016844565.1_ASM1684456v1_genomic.fna	Chloroflexota
GCA_016844585.1_ASM1684458v1_genomic.fna	Chloroflexota
GCA_016844625.1_ASM1684462v1_genomic.fna	Desulfobacterota
GCA_016865445.1_ASM1686544v1_genomic.fna	Firmicutes
GCA_016866735.1_JGI_2017-08-21_genomic.fna	Patescibacteria
GCA_016867055.1_JGI_2017-08-21_genomic.fna	Omnitrophota
GCA_016867135.1_JGI_2017-08-21_genomic.fna	Omnitrophota
GCA_016867725.1_JGI_2017-08-21_genomic.fna	VGIX01
GCA_016868975.1_JGI_2017-08-21_genomic.fna	Eremiobacterota
GCA_016869275.1_JGI_2017-08-21_genomic.fna	Proteobacteria
GCA_016869515.1_JGI_2017-08-21_genomic.fna	Proteobacteria
GCA_016869645.1_JGI_2017-08-21_genomic.fna	Proteobacteria
GCA_016869765.1_JGI_2017-08-21_genomic.fna	Proteobacteria
GCA_016872875.1_JGI_2017-08-21_genomic.fna	Planctomycetota
GCA_016874315.1_JGI_2017-08-21_genomic.fna	Proteobacteria
GCA_016875215.1_JGI_2017-08-21_genomic.fna	Myxococcota
GCA_016875715.1_JGI_2017-08-21_genomic.fna	Chloroflexota
GCA_016875995.1_JGI_2017-08-21_genomic.fna	Chloroflexota
GCA_016926475.1_ASM1692647v1_genomic.fna	WOR-3
GCA_016926495.1_ASM1692649v1_genomic.fna	JAFGOL01
GCA_016927125.1_ASM1692712v1_genomic.fna	Planctomycetota
GCA_016927185.1_ASM1692718v1_genomic.fna	JAFGND01
GCA_016927515.1_ASM1692751v1_genomic.fna	CSSED10-310
GCA_016927655.1_ASM1692765v1_genomic.fna	Patescibacteria
GCA_016927685.1_ASM1692768v1_genomic.fna	Patescibacteria
GCA_016927995.1_ASM1692799v1_genomic.fna	Patescibacteria
GCA_016928375.1_ASM1692837v1_genomic.fna	Omnitrophota
GCA_016928395.1_ASM1692839v1_genomic.fna	Fermentibacterota
GCA_016928555.1_ASM1692855v1_genomic.fna	Ratteibacteria
GCA_016928695.1_ASM1692869v1_genomic.fna	Sumerlaeota
GCA_016928715.1_ASM1692871v1_genomic.fna	Chloroflexota
GCA_016928935.1_ASM1692893v1_genomic.fna	Eisenbacteria
GCA_016929035.1_ASM1692903v1_genomic.fna	JAFGBW01
GCA_016929205.1_ASM1692920v1_genomic.fna	Chloroflexota
GCA_016929395.1_ASM1692939v1_genomic.fna	Desulfobacterota
GCA_016929445.1_ASM1692944v1_genomic.fna	Omnitrophota
GCA_016929465.1_ASM1692946v1_genomic.fna	B130-G9
GCA_016929905.1_ASM1692990v1_genomic.fna	Verrucomicrobiota
GCA_016930115.1_ASM1693011v1_genomic.fna	Spirochaetota
GCA_016930215.1_ASM1693021v1_genomic.fna	Myxococcota
GCA_016930435.1_ASM1693043v1_genomic.fna	UBP14
GCA_016930485.1_ASM1693048v1_genomic.fna	Omnitrophota
GCA_016930535.1_ASM1693053v1_genomic.fna	QNDG01
GCA_016930595.1_ASM1693059v1_genomic.fna	Planctomycetota
GCA_016930695.1_ASM1693069v1_genomic.fna	JABDJQ01
GCA_016931135.1_ASM1693113v1_genomic.fna	Sumerlaeota
GCA_016931415.1_ASM1693141v1_genomic.fna	JABMQX01
GCA_016931535.1_ASM1693153v1_genomic.fna	Myxococcota
GCA_016932135.1_ASM1693213v1_genomic.fna	Spirochaetota
GCA_016932295.1_ASM1693229v1_genomic.fna	CSSED10-310
GCA_016932595.1_ASM1693259v1_genomic.fna	Desulfobacterota
GCA_016932915.1_ASM1693291v1_genomic.fna	Acidobacteriota
GCA_016932965.1_ASM1693296v1_genomic.fna	JAFGBW01
GCA_016933675.1_ASM1693367v1_genomic.fna	Desulfobacterota
GCA_016934265.1_ASM1693426v1_genomic.fna	Spirochaetota
GCA_016934335.1_ASM1693433v1_genomic.fna	OLB16
GCA_016934455.1_ASM1693445v1_genomic.fna	Myxococcota
GCA_016934495.1_ASM1693449v1_genomic.fna	Myxococcota
GCA_016934595.1_ASM1693459v1_genomic.fna	SZUA-182
GCA_016934675.1_ASM1693467v1_genomic.fna	CSSED10-310
GCA_016934855.1_ASM1693485v1_genomic.fna	CG03
GCA_016935365.1_ASM1693536v1_genomic.fna	Myxococcota
GCA_016935485.1_ASM1693548v1_genomic.fna	Planctomycetota
GCA_016936615.1_ASM1693661v1_genomic.fna	Spirochaetota
GCA_016936735.1_ASM1693673v1_genomic.fna	UBP6
GCA_016937135.1_ASM1693713v1_genomic.fna	BMS3Abin14
GCA_016937175.1_ASM1693717v1_genomic.fna	Mcinerneyibacteriota
GCA_017134395.1_ASM1713439v1_genomic.fna	Patescibacteria
GCA_017161665.1_ASM1716166v1_genomic.fna	Sumerlaeota
GCA_017161705.1_ASM1716170v1_genomic.fna	Sumerlaeota
GCA_017302715.1_ASM1730271v1_genomic.fna	Bdellovibrionota
GCA_017302815.1_ASM1730281v1_genomic.fna	Planctomycetota
GCA_017303995.1_ASM1730399v1_genomic.fna	Bacteroidota
GCA_017307685.1_ASM1730768v1_genomic.fna	Chloroflexota
GCA_017308135.1_ASM1730813v1_genomic.fna	Proteobacteria
GCA_017308305.1_ASM1730830v1_genomic.fna	Proteobacteria
GCA_017498545.1_ASM1749854v1_genomic.fna	Acidobacteriota
GCA_017577895.1_D03-11_genomic.fna	Firmicutes
GCA_017620795.1_ASM1762079v1_genomic.fna	Firmicutes
GCA_017622395.1_ASM1762239v1_genomic.fna	Firmicutes
GCA_017643325.1_ASM1764332v1_genomic.fna	Proteobacteria
GCA_017656145.1_ASM1765614v1_genomic.fna	Firmicutes
GCA_017656255.1_ASM1765625v1_genomic.fna	Firmicutes
GCA_017751145.1_ASM1775114v1_genomic.fna	Firmicutes
GCA_017859655.1_ASM1785965v1_genomic.fna	Planctomycetota
GCA_017860135.1_ASM1786013v1_genomic.fna	Acidobacteriota
GCA_017860675.1_ASM1786067v1_genomic.fna	Chloroflexota
GCA_017861495.1_ASM1786149v1_genomic.fna	Firmicutes
GCA_017885175.1_ASM1788517v1_genomic.fna	Krumholzibacteriota
GCA_017885365.1_ASM1788536v1_genomic.fna	Nitrospirota
GCA_017885485.1_ASM1788548v1_genomic.fna	Chloroflexota
GCA_017889845.1_ASM1788984v1_genomic.fna	Desulfobacterota
GCA_017935525.1_ASM1793552v1_genomic.fna	Firmicutes
GCA_017936155.1_ASM1793615v1_genomic.fna	Firmicutes
GCA_017945865.1_ASM1794586v1_genomic.fna	Actinobacteriota
GCA_017983775.1_ASM1798377v1_genomic.fna	Patescibacteria
GCA_017984655.1_ASM1798465v1_genomic.fna	Patescibacteria
GCA_017990045.1_ASM1799004v1_genomic.fna	Bacteroidota
GCA_017990495.1_ASM1799049v1_genomic.fna	Acidobacteriota
GCA_017990795.1_ASM1799079v1_genomic.fna	Myxococcota
GCA_017992335.1_ASM1799233v1_genomic.fna	Patescibacteria
GCA_017992455.1_ASM1799245v1_genomic.fna	Omnitrophota
GCA_017992655.1_ASM1799265v1_genomic.fna	Patescibacteria
GCA_017992755.1_ASM1799275v1_genomic.fna	Patescibacteria
GCA_017992975.1_ASM1799297v1_genomic.fna	Thermotogota
GCA_017993055.1_ASM1799305v1_genomic.fna	Armatimonadota
GCA_017993955.1_ASM1799395v1_genomic.fna	Omnitrophota
GCA_017994375.1_ASM1799437v1_genomic.fna	Omnitrophota
GCA_017994815.1_ASM1799481v1_genomic.fna	Acidobacteriota
GCA_017996315.1_ASM1799631v1_genomic.fna	Verrucomicrobiota
GCA_017996625.1_ASM1799662v1_genomic.fna	Desulfobacterota
GCA_017996775.1_ASM1799677v1_genomic.fna	Firmicutes
GCA_017997475.1_ASM1799747v1_genomic.fna	UBP6
GCA_017997825.1_ASM1799782v1_genomic.fna	JAGOEH01
GCA_017998755.1_ASM1799875v1_genomic.fna	Spirochaetota
GCA_017998915.1_ASM1799891v1_genomic.fna	Riflebacteria
GCA_017999075.1_ASM1799907v1_genomic.fna	JAGOBX01
GCA_017999215.1_ASM1799921v1_genomic.fna	Acidobacteriota
GCA_017999445.1_ASM1799944v1_genomic.fna	WOR-3
GCA_017999615.1_ASM1799961v1_genomic.fna	Proteobacteria
GCA_017999735.1_ASM1799973v1_genomic.fna	Fermentibacterota
GCA_018000135.1_ASM1800013v1_genomic.fna	Planctomycetota
GCA_018000835.1_ASM1800083v1_genomic.fna	Goldbacteria
GCA_018001935.1_ASM1800193v1_genomic.fna	Acidobacteriota
GCA_018052565.1_ASM1805256v1_genomic.fna	Patescibacteria
GCA_018053065.1_ASM1805306v1_genomic.fna	Desulfobacterota
GCA_018053165.1_ASM1805316v1_genomic.fna	DUMJ01
GCA_018053685.1_ASM1805368v1_genomic.fna	Patescibacteria
GCA_018054005.1_ASM1805400v1_genomic.fna	Caldisericota
GCA_018054125.1_ASM1805412v1_genomic.fna	Atribacterota
GCA_018054975.1_ASM1805497v1_genomic.fna	Verrucomicrobiota
GCA_018055515.1_ASM1805551v1_genomic.fna	Chloroflexota
GCA_018056145.1_ASM1805614v1_genomic.fna	Armatimonadota
GCA_018056325.1_ASM1805632v1_genomic.fna	Myxococcota
GCA_018056375.1_ASM1805637v1_genomic.fna	Patescibacteria
GCA_018056575.1_ASM1805657v1_genomic.fna	Spirochaetota
GCA_018056705.1_ASM1805670v1_genomic.fna	Hydrogenedentota
GCA_018056805.1_ASM1805680v1_genomic.fna	Marinisomatota
GCA_018057525.1_ASM1805752v1_genomic.fna	Elusimicrobiota
GCA_018058445.1_ASM1805844v1_genomic.fna	Firmicutes
GCA_018060745.1_ASM1806074v1_genomic.fna	Proteobacteria
GCA_018061105.1_ASM1806110v1_genomic.fna	Proteobacteria
GCA_018061225.1_ASM1806122v1_genomic.fna	Omnitrophota
GCA_018061255.1_ASM1806125v1_genomic.fna	Proteobacteria
GCA_018061325.1_ASM1806132v1_genomic.fna	Proteobacteria
GCA_018061685.1_ASM1806168v1_genomic.fna	Patescibacteria
GCA_018062285.1_ASM1806228v1_genomic.fna	Patescibacteria
GCA_018062515.1_ASM1806251v1_genomic.fna	Omnitrophota
GCA_018062625.1_ASM1806262v1_genomic.fna	Patescibacteria
GCA_018208355.1_ASM1820835v1_genomic.fna	Firmicutes
GCA_018241565.1_ASM1824156v1_genomic.fna	Proteobacteria
GCA_018241965.1_ASM1824196v1_genomic.fna	Proteobacteria
GCA_018242065.1_ASM1824206v1_genomic.fna	Proteobacteria
GCA_018262315.1_ASM1826231v1_genomic.fna	Myxococcota
GCA_018262835.1_ASM1826283v1_genomic.fna	Acidobacteriota
GCA_018263365.1_ASM1826336v1_genomic.fna	Marinisomatota
GCA_018263585.1_ASM1826358v1_genomic.fna	AABM5-125-24
GCA_018265555.1_ASM1826555v1_genomic.fna	Firmicutes
GCA_018266375.1_ASM1826637v1_genomic.fna	Bdellovibrionota
GCA_018266755.1_ASM1826675v1_genomic.fna	Bacteroidota
GCA_018267475.1_ASM1826747v1_genomic.fna	Bacteroidota
GCA_018268815.1_ASM1826881v1_genomic.fna	Acidobacteriota
GCA_018334615.1_ASM1833461v1_genomic.fna	Bipolaricaulota
GCA_018334695.1_ASM1833469v1_genomic.fna	Cloacimonadota
GCA_018334735.1_ASM1833473v1_genomic.fna	Planctomycetota
GCA_018335295.1_ASM1833529v1_genomic.fna	Acidobacteriota
GCA_018394315.1_ASM1839431v1_genomic.fna	Firmicutes
GCA_018399255.1_ASM1839925v1_genomic.fna	Spirochaetota
GCA_018399975.1_ASM1839997v1_genomic.fna	Omnitrophota
GCA_018402095.1_ASM1840209v1_genomic.fna	Margulisbacteria
GCA_018402195.1_ASM1840219v1_genomic.fna	Proteobacteria
GCA_018434225.1_SM1_genomic.fna	Firmicutes
GCA_018435605.1_R3_genomic.fna	Aureabacteria
GCA_018437505.1_ASM1843750v1_genomic.fna	Actinobacteriota
GCA_018606645.1_ASM1860664v1_genomic.fna	Chloroflexota
GCA_018607285.1_ASM1860728v1_genomic.fna	Proteobacteria
GCA_018609185.1_ASM1860918v1_genomic.fna	Patescibacteria
GCA_018644665.1_ASM1864466v1_genomic.fna	Poribacteria
GCA_018644705.1_ASM1864470v1_genomic.fna	Marinisomatota
GCA_018644725.1_ASM1864472v1_genomic.fna	Planctomycetota
GCA_018644805.1_ASM1864480v1_genomic.fna	Marinisomatota
GCA_018644845.1_ASM1864484v1_genomic.fna	Margulisbacteria
GCA_018644935.1_ASM1864493v1_genomic.fna	AABM5-125-24
GCA_018645005.1_ASM1864500v1_genomic.fna	SAR324
GCA_018645085.1_ASM1864508v1_genomic.fna	SAR324
GCA_018645125.1_ASM1864512v1_genomic.fna	Proteobacteria
GCA_018645205.1_ASM1864520v1_genomic.fna	Marinisomatota
GCA_018645265.1_ASM1864526v1_genomic.fna	UBA10199
GCA_018645275.1_ASM1864527v1_genomic.fna	Verrucomicrobiota
GCA_018646545.1_ASM1864654v1_genomic.fna	Proteobacteria
GCA_018648305.1_ASM1864830v1_genomic.fna	Proteobacteria
GCA_018648325.1_ASM1864832v1_genomic.fna	Chloroflexota
GCA_018648485.1_ASM1864848v1_genomic.fna	UBA8248
GCA_018648585.1_ASM1864858v1_genomic.fna	Patescibacteria
GCA_018648705.1_ASM1864870v1_genomic.fna	Krumholzibacteriota
GCA_018648845.1_ASM1864884v1_genomic.fna	Bacteroidota
GCA_018649565.1_ASM1864956v1_genomic.fna	Proteobacteria
GCA_018651345.1_ASM1865134v1_genomic.fna	Proteobacteria
GCA_018651725.1_ASM1865172v1_genomic.fna	Patescibacteria
GCA_018656855.1_ASM1865685v1_genomic.fna	Latescibacterota
GCA_018658465.1_ASM1865846v1_genomic.fna	Proteobacteria
GCA_018661205.1_ASM1866120v1_genomic.fna	Proteobacteria
GCA_018663165.1_ASM1866316v1_genomic.fna	Proteobacteria
GCA_018677305.1_ASM1867730v1_genomic.fna	Proteobacteria
GCA_018698675.1_ASM1869867v1_genomic.fna	Margulisbacteria
GCA_018725125.1_ASM1872512v1_genomic.fna	HKB111
GCA_018725405.1_ASM1872540v1_genomic.fna	Chloroflexota
GCA_018729555.1_ASM1872955v1_genomic.fna	Firmicutes
GCA_018780035.1_ASM1878003v1_genomic.fna	Cyanobacteria
GCA_018780265.1_ASM1878026v1_genomic.fna	Eremiobacterota
GCA_018780435.1_ASM1878043v1_genomic.fna	Myxococcota
GCA_018798885.1_ASM1879888v1_genomic.fna	Proteobacteria
GCA_018812265.1_ASM1881226v1_genomic.fna	AABM5-125-24
GCA_018812485.1_ASM1881248v1_genomic.fna	JAHJDO01
GCA_018812555.1_ASM1881255v1_genomic.fna	Chloroflexota
GCA_018812585.1_ASM1881258v1_genomic.fna	AABM5-125-24
GCA_018812925.1_ASM1881292v1_genomic.fna	CAIJMQ01
GCA_018813925.1_ASM1881392v1_genomic.fna	Patescibacteria
GCA_018814055.1_ASM1881405v1_genomic.fna	Patescibacteria
GCA_018814585.1_ASM1881458v1_genomic.fna	Margulisbacteria
GCA_018816645.1_ASM1881664v1_genomic.fna	Patescibacteria
GCA_018817365.1_ASM1881736v1_genomic.fna	Patescibacteria
GCA_018817865.1_ASM1881786v1_genomic.fna	Spirochaetota
GCA_018818205.1_ASM1881820v1_genomic.fna	Patescibacteria
GCA_018823795.1_ASM1882379v1_genomic.fna	Omnitrophota
GCA_018825765.1_ASM1882576v1_genomic.fna	Patescibacteria
GCA_018829455.1_ASM1882945v1_genomic.fna	Ratteibacteria
GCA_018829875.1_ASM1882987v1_genomic.fna	Bacteroidota
GCA_018830405.1_ASM1883040v1_genomic.fna	Nitrospinota
GCA_018830565.1_ASM1883056v1_genomic.fna	UBA9089
GCA_018830605.1_ASM1883060v1_genomic.fna	Patescibacteria
GCA_018830725.1_ASM1883072v1_genomic.fna	Actinobacteriota
GCA_018831195.1_ASM1883119v1_genomic.fna	Eisenbacteria
GCA_018866245.1_ASM1886624v1_genomic.fna	Firmicutes
GCA_018883285.1_ASM1888328v1_genomic.fna	Proteobacteria
GCA_018894435.1_ASM1889443v1_genomic.fna	Omnitrophota
GCA_018894455.1_ASM1889445v1_genomic.fna	Patescibacteria
GCA_018899075.1_ASM1889907v1_genomic.fna	Omnitrophota
GCA_018968785.1_ASM1896878v1_genomic.fna	Patescibacteria
GCA_018970385.1_ASM1897038v1_genomic.fna	Cyanobacteria
GCA_018970625.1_ASM1897062v1_genomic.fna	Myxococcota
GCA_018971345.1_ASM1897134v1_genomic.fna	Proteobacteria
GCA_019052695.1_ASM1905269v1_genomic.fna	Omnitrophota
GCA_019136035.1_ASM1913603v1_genomic.fna	Verrucomicrobiota
GCA_019136435.1_ASM1913643v1_genomic.fna	Armatimonadota
GCA_019136485.1_ASM1913648v1_genomic.fna	Verrucomicrobiota
GCA_019136575.1_ASM1913657v1_genomic.fna	Caldisericota
GCA_019136685.1_ASM1913668v1_genomic.fna	Firmicutes
GCA_019136855.1_ASM1913685v1_genomic.fna	Spirochaetota
GCA_019137235.1_ASM1913723v1_genomic.fna	Firmicutes
GCA_019186845.1_ASM1918684v1_genomic.fna	Planctomycetota
GCA_019187285.1_ASM1918728v1_genomic.fna	OLB16
GCA_019248045.1_ASM1924804v1_genomic.fna	Patescibacteria
GCA_019248165.1_ASM1924816v1_genomic.fna	Patescibacteria
GCA_900498245.1_TRIP_c_PRJEB27924_genomic.fna	Zixibacteria
GCA_902505605.1_MAG_SS3_genomic.fna	Acidobacteriota
GCA_902597385.1_AG-453-E14_genomic.fna	Proteobacteria
GCA_902603495.1_AG-457-K17_genomic.fna	Proteobacteria
GCA_902607475.1_AG-464-G09_genomic.fna	Proteobacteria
GCA_902613995.1_AG-891-J16_genomic.fna	Proteobacteria
GCA_902763515.1_Rumen_uncultured_genome_RUG10868_genomic.fna	Spirochaetota
GCA_902773345.1_Rumen_uncultured_genome_RUG11865_genomic.fna	RUG730
GCA_902777045.1_Rumen_uncultured_genome_RUG12223_genomic.fna	Eremiobacterota
GCA_902784685.1_Rumen_uncultured_genome_RUG12999_genomic.fna	Firmicutes
GCA_902805635.1_AVDCRST-MAG77_genomic.fna	Chloroflexota
GCA_902812335.1_chloroflexib22_genomic.fna	Chloroflexota
GCA_902812875.1_clostridialesb30_genomic.fna	Firmicutes
GCA_902826885.1_RBC064_genomic.fna	Proteobacteria
GCA_902827055.1_RBC038_genomic.fna	Chloroflexota
GCA_903824965.1_freshwater_MAG_---_KR_bin-0880_genomic.fna	Proteobacteria
GCA_903845195.1_freshwater_MAG_---_AM-2014_bin-1447_genomic.fna	Planctomycetota
GCA_903847975.1_freshwater_MAG_---_LaPlata_bin-3695_genomic.fna	Acidobacteriota
GCA_903866215.1_freshwater_MAG_---_Kiruna_bin-11008_genomic.fna	Proteobacteria
GCA_903870015.1_freshwater_MAG_---_Loclat_bin-12361_genomic.fna	Proteobacteria
GCA_903895695.1_freshwater_MAG_---_AlinenLipids_bin-7679_genomic.fna	Verrucomicrobiota
GCA_903897595.1_freshwater_MAG_---_Loclat_bin-01431_genomic.fna	Patescibacteria
GCA_903901045.1_freshwater_MAG_---_AM-2014_bin-0320_genomic.fna	Planctomycetota
GCA_903928345.1_freshwater_MAG_---_AlinenLipids_bin-0042_genomic.fna	Armatimonadota
GCA_905233185.1_RUG30027_genomic.fna	Proteobacteria
GCA_905233975.1_RUG30084_genomic.fna	Proteobacteria
GCA_905235515.1_RUG30252_genomic.fna	Firmicutes
GCA_905479545.1_10_20180412_Bin_Bin_167_1_genomic.fna	Proteobacteria
GCA_905612315.1_RIS-SAG-18_genomic.fna	Proteobacteria
GCA_907165195.1_Cryomorphaceae_CECT30217_genomic.fna	Bacteroidota
GCA_910576925.1_MGBC103219_genomic.fna	Firmicutes
GCA_910576955.1_MGBC103325_genomic.fna	Proteobacteria
GCA_910588255.1_MGBC162888_genomic.fna	Proteobacteria
GCA_910589185.1_MGBC166183_genomic.fna	Firmicutes
GCF_000006945.2_ASM694v2_genomic.fna	Proteobacteria
GCF_000007765.2_ASM776v2_genomic.fna	Proteobacteria
GCF_000008725.1_ASM872v1_genomic.fna	Chlamydiota
GCF_000009045.1_ASM904v1_genomic.fna	Firmicutes
GCF_000009085.1_ASM908v1_genomic.fna	Campylobacterota
GCF_000009905.1_ASM990v1_genomic.fna	Firmicutes
GCF_000012345.1_ASM1234v1_genomic.fna	Proteobacteria
GCF_000012525.1_ASM1252v1_genomic.fna	Cyanobacteria
GCF_000012865.1_ASM1286v1_genomic.fna	Firmicutes
GCF_000013205.1_ASM1320v1_genomic.fna	Cyanobacteria
GCF_000013405.1_ASM1340v1_genomic.fna	Desulfobacterota
GCF_000013425.1_ASM1342v1_genomic.fna	Firmicutes
GCF_000014865.1_ASM1486v1_genomic.fna	Proteobacteria
GCF_000015025.1_ASM1502v1_genomic.fna	Actinobacteriota
GCF_000017565.1_ASM1756v1_genomic.fna	Proteobacteria
GCF_000019905.1_ASM1990v1_genomic.fna	Firmicutes
GCF_000020005.1_ASM2000v1_genomic.fna	Firmicutes
GCF_000020145.1_ASM2014v1_genomic.fna	Elusimicrobiota
GCF_000020945.1_ASM2094v1_genomic.fna	Coprothermobacterota
GCF_000021545.1_ASM2154v1_genomic.fna	Aquificota
GCF_000021645.1_ASM2164v1_genomic.fna	Dictyoglomota
GCF_000021945.1_ASM2194v1_genomic.fna	Chloroflexota
GCF_000022005.1_ASM2200v1_genomic.fna	Proteobacteria
GCF_000024465.1_ASM2446v1_genomic.fna	Proteobacteria
GCF_000024605.1_ASM2460v1_genomic.fna	Firmicutes
GCF_000024765.1_ASM2476v1_genomic.fna	Proteobacteria
GCF_000024805.1_ASM2480v1_genomic.fna	Myxococcota
GCF_000024845.1_ASM2484v1_genomic.fna	Bacteroidota
GCF_000024985.1_ASM2498v1_genomic.fna	Chloroflexota
GCF_000025005.1_ASM2500v1_genomic.fna	Chloroflexota
GCF_000025305.1_ASM2530v1_genomic.fna	Firmicutes
GCF_000092405.1_ASM9240v1_genomic.fna	Firmicutes
GCF_000143965.1_ASM14396v1_genomic.fna	Desulfobacterota
GCF_000143985.1_ASM14398v1_genomic.fna	Spirochaetota
GCF_000146065.2_ASM14606v1_genomic.fna	Cloacimonadota
GCF_000146505.1_ASM14650v1_genomic.fna	Fibrobacterota
GCF_000170755.1_ASM17075v1_genomic.fna	Verrucomicrobiota
GCF_000174415.1_ASM17441v1_genomic.fna	Firmicutes
GCF_000177635.2_ASM17763v2_genomic.fna	Chrysiogenota
GCF_000184345.1_ASM18434v2_genomic.fna	Spirochaetota
GCF_000184705.1_ASM18470v1_genomic.fna	Firmicutes
GCF_000191045.1_ASM19104v1_genomic.fna	Aquificota
GCF_000191145.1_ASM19114v1_genomic.fna	Proteobacteria
GCF_000194135.1_ASM19413v1_genomic.fna	Campylobacterota
GCF_000195295.1_ASM19529v1_genomic.fna	Desulfobacterota
GCF_000195955.2_ASM19595v2_genomic.fna	Actinobacteriota
GCF_000196035.1_ASM19603v1_genomic.fna	Firmicutes
GCF_000210915.2_ASM21091v2_genomic.fna	Bdellovibrionota
GCF_000213235.1_ASM21323v1_genomic.fna	Firmicutes
GCF_000213255.1_ASM21325v1_genomic.fna	Firmicutes
GCF_000215935.2_HLPCO_V2_genomic.fna	Firmicutes
GCF_000219125.1_ASM21912v1_genomic.fna	Firmicutes
GCF_000223215.1_ASM22321v1_genomic.fna	Spirochaetota
GCF_000226295.1_ASM22629v1_genomic.fna	Acidobacteriota
GCF_000226315.1_ASM22631v1_genomic.fna	Proteobacteria
GCF_000231405.2_ASM23140v3_genomic.fna	Firmicutes
GCF_000236685.1_ASM23668v1_genomic.fna	Spirochaetota
GCF_000242615.2_ASM24261v3_genomic.fna	Acidobacteriota
GCF_000264455.2_ASM26445v2_genomic.fna	Proteobacteria
GCF_000266885.1_ASM26688v1_genomic.fna	Spirochaetota
GCF_000266945.1_ASM26694v1_genomic.fna	Desulfobacterota
GCF_000279145.1_ASM27914v1_genomic.fna	Bacteroidota
GCF_000281175.1_ASM28117v1_genomic.fna	Chloroflexota
GCF_000284315.1_ASM28431v1_genomic.fna	Nitrospirota
GCF_000284335.1_ASM28433v1_genomic.fna	Caldisericota
GCF_000292685.1_ASM29268v1_genomic.fna	Proteobacteria
GCF_000305935.1_ASM30593v1_genomic.fna	Firmicutes
GCF_000306675.2_ASM30667v3_genomic.fna	Spirochaetota
GCF_000316515.1_ASM31651v1_genomic.fna	Cyanobacteria
GCF_000317045.1_ASM31704v1_genomic.fna	Cyanobacteria
GCF_000319385.1_ASM31938v1_genomic.fna	Proteobacteria
GCF_000328625.1_ASM32862v1_genomic.fna	Firmicutes
GCF_000331575.1_ASM33157v1_genomic.fna	Firmicutes
GCF_000332315.1_ASM33231v1_genomic.fna	Cyanobacteria
GCF_000341545.2_ASM34154v2_genomic.fna	Nitrospinota
GCF_000348725.1_ASM34872v1_genomic.fna	Bdellovibrionota
GCF_000384115.1_ASM38411v1_genomic.fna	Actinobacteriota
GCF_000422285.1_ASM42228v1_genomic.fna	Desulfobacterota
GCF_000423185.1_ASM42318v1_genomic.fna	Proteobacteria
GCF_000426705.1_ASM42670v1_genomic.fna	Spirochaetota
GCF_000427095.1_T49_genomic.fna	Armatimonadota
GCF_000427665.1_ASM42766v1_genomic.fna	Proteobacteria
GCF_000430605.1_ASM43060v1_genomic.fna	Firmicutes
GCF_000474745.1_Acht1_1_genomic.fna	Fibrobacterota
GCF_000507245.1_ASM50724v1_genomic.fna	Spirochaetota
GCF_000510645.1_ASM51064v1_genomic.fna	Firmicutes
GCF_000512235.1_ASM51223v1_genomic.fna	Desulfobacterota
GCF_000512735.1_ASM51273v1_genomic.fna	Aquificota
GCF_000526155.1_ASM52615v1_genomic.fna	Desulfobacterota
GCF_000620305.1_ASM62030v1_genomic.fna	Firmicutes
GCF_000687145.1_TheAqu1.0_genomic.fna	Acidobacteriota
GCF_000724625.1_ASM72462v1_genomic.fna	Armatimonadota
GCF_000742835.1_ASM74283v1_genomic.fna	Proteobacteria
GCF_000746025.2_ASM74602v2_genomic.fna	Firmicutes
GCF_000763575.1_ASM76357v1_genomic.fna	Firmicutes
GCF_000775285.1_ASM77528v1_genomic.fna	Cyanobacteria
GCF_000820845.2_K22_genomic.fna	Acidobacteriota
GCF_001027545.1_ASM102754v1_genomic.fna	Elusimicrobiota
GCF_001049895.1_Rubeoparvulum_massiliensis_genomic.fna	Firmicutes
GCF_001263205.1_ASM126320v1_genomic.fna	Myxococcota
GCF_001263415.1_ASM126341v1_genomic.fna	Firmicutes
GCF_001273775.1_ASM127377v1_genomic.fna	Nitrospirota
GCF_001293165.1_ASM129316v1_genomic.fna	Proteobacteria
GCF_001305575.3_ASM130557v3_genomic.fna	Proteobacteria
GCF_001306175.1_ASM130617v1_genomic.fna	Chloroflexota
GCF_001375675.1_Massilibacterium_senegalense_genomic.fna	Firmicutes
GCF_001399755.1_ASM139975v1_genomic.fna	Proteobacteria
GCF_001544015.1_ASM154401v1_genomic.fna	Firmicutes
GCF_001547735.1_ASM154773v1_genomic.fna	Thermosulfidibacterota
GCF_001577525.1_ASM157752v1_genomic.fna	Desulfobacterota
GCF_001579945.1_ASM157994v1_genomic.fna	Proteobacteria
GCF_001584725.1_ASM158472v1_genomic.fna	Firmicutes
GCF_001614315.2_ASM161431v2_genomic.fna	Proteobacteria
GCF_001618865.1_ASM161886v1_genomic.fna	Acidobacteriota
GCF_001629705.1_ASM162970v2_genomic.fna	Firmicutes
GCF_001677435.1_ASM167743v1_genomic.fna	Proteobacteria
GCF_001697225.1_ASM169722v1_genomic.fna	Proteobacteria
GCF_001701045.1_ASM170104v1_genomic.fna	Synergistota
GCF_001742305.1_ASM174230v1_genomic.fna	Firmicutes
GCF_001747405.1_ASM174740v1_genomic.fna	Bacteroidota
GCF_001753245.1_ASM175324v1_genomic.fna	Proteobacteria
GCF_001870225.1_ASM187022v1_genomic.fna	Cyanobacteria
GCF_001874605.1_ASM187460v1_genomic.fna	Firmicutes
GCF_001886815.1_ASM188681v1_genomic.fna	Calditrichota
GCF_001887775.1_ASM188777v1_genomic.fna	Desulfobacterota
GCF_001939115.1_ASM193911v1_genomic.fna	Cyanobacteria
GCF_002005145.1_ASM200514v1_genomic.fna	Firmicutes
GCF_002075285.3_ASM207528v3_genomic.fna	Cyanobacteria
GCF_002087085.1_ASM208708v1_genomic.fna	Spirochaetota
GCF_002117005.1_ASM211700v1_genomic.fna	Planctomycetota
GCF_002117145.1_ASM211714v1_genomic.fna	Proteobacteria
GCF_002142475.1_ASM214247v1_genomic.fna	Cyanobacteria
GCF_002148795.1_ASM214879v1_genomic.fna	Proteobacteria
GCF_002207765.1_ASM220776v1_genomic.fna	Firmicutes
GCF_002215215.1_ASM221521v1_genomic.fna	Proteobacteria
GCF_002224645.1_ASM222464v1_genomic.fna	Firmicutes
GCF_002251735.1_ASM225173v1_genomic.fna	Proteobacteria
GCF_002252565.1_ASM225256v1_genomic.fna	Firmicutes
GCF_002287885.2_ASM228788v2_genomic.fna	Actinobacteriota
GCF_002305855.1_ASM230585v1_genomic.fna	Myxococcota
GCF_002310495.1_ASM231049v1_genomic.fna	Verrucomicrobiota
GCF_002343915.1_ASM234391v1_genomic.fna	Myxococcota
GCF_002355375.1_ASM235537v1_genomic.fna	Firmicutes
GCF_002355735.1_ASM235573v1_genomic.fna	Proteobacteria
GCF_002356555.2_HH1059_assembly_1.0_genomic.fna	Proteobacteria
GCF_002754935.1_ASM275493v1_genomic.fna	Cyanobacteria
GCF_002776555.1_ASM277655v1_genomic.fna	Proteobacteria
GCF_002795805.1_ASM279580v1_genomic.fna	Proteobacteria
GCF_002798435.1_ASM279843v1_genomic.fna	Proteobacteria
GCF_002804065.1_ASM280406v1_genomic.fna	Firmicutes
GCF_002874775.1_ASM287477v1_genomic.fna	Firmicutes
GCF_002930195.1_ASM293019v1_genomic.fna	Proteobacteria
GCF_002973605.1_ASM297360v1_genomic.fna	Armatimonadota
GCF_002998295.1_ASM299829v1_genomic.fna	Firmicutes
GCF_003044035.1_ASM304403v1_genomic.fna	Methylomirabilota
GCF_003057965.1_ASM305796v1_genomic.fna	Thermodesulfobiota
GCF_003096215.1_ASM309621v1_genomic.fna	Firmicutes
GCF_003096415.1_ASM309641v1_genomic.fna	Verrucomicrobiota
GCF_003097315.1_ASM309731v1_genomic.fna	Proteobacteria
GCF_003337735.1_ASM333773v1_genomic.fna	Proteobacteria
GCF_003339615.1_ASM333961v1_genomic.fna	Chlamydiota
GCF_003351045.1_ASM335104v1_genomic.fna	Actinobacteriota
GCF_003353065.1_ASM335306v1_genomic.fna	Bacteroidota
GCF_003570935.1_ASM357093v1_genomic.fna	Caldisericota
GCF_003590945.1_ASM359094v1_genomic.fna	Proteobacteria
GCF_003628755.1_ASM362875v1_genomic.fna	Firmicutes
GCF_003633725.1_ASM363372v1_genomic.fna	Firmicutes
GCF_003751635.1_ASM375163v1_genomic.fna	Proteobacteria
GCF_003932505.1_ASM393250v1_genomic.fna	Proteobacteria
GCF_003966755.1_ASM396675v1_genomic.fna	Proteobacteria
GCF_003966975.1_ASM396697v1_genomic.fna	Chloroflexota
GCF_003967195.1_ASM396719v1_genomic.fna	Proteobacteria
GCF_003991135.1_ASM399113v1_genomic.fna	Firmicutes
GCF_004001245.1_ASM400124v1_genomic.fna	Proteobacteria
GCF_004087915.1_ASM408791v1_genomic.fna	Deferribacterota
GCF_004102945.1_ASM410294v1_genomic.fna	Omnitrophota
GCF_004208415.1_ASM420841v1_genomic.fna	Chloroflexota
GCF_004295685.1_ASM429568v1_genomic.fna	Bdellovibrionota
GCF_004300825.1_ASM430082v1_genomic.fna	Actinobacteriota
GCF_004322855.1_ASM432285v1_genomic.fna	Actinobacteriota
GCF_004339085.1_ASM433908v1_genomic.fna	Proteobacteria
GCF_004340685.1_ASM434068v1_genomic.fna	Firmicutes
GCF_004341245.1_ASM434124v1_genomic.fna	Proteobacteria
GCF_004341915.1_ASM434191v1_genomic.fna	Verrucomicrobiota
GCF_004342885.1_ASM434288v1_genomic.fna	Firmicutes
GCF_004346105.1_ASM434610v1_genomic.fna	Bdellovibrionota
GCF_004364935.1_ASM436493v1_genomic.fna	Proteobacteria
GCF_004366735.1_ASM436673v1_genomic.fna	Proteobacteria
GCF_004421105.1_ASM442110v1_genomic.fna	Proteobacteria
GCF_004684205.1_ASM468420v1_genomic.fna	Proteobacteria
GCF_005083985.2_ASM508398v2_genomic.fna	Campylobacterota
GCF_005377625.1_ASM537762v1_genomic.fna	Desulfobacterota
GCF_005473905.2_ASM547390v2_genomic.fna	Firmicutes
GCF_005771635.1_ASM577163v1_genomic.fna	Firmicutes
GCF_007197755.1_ASM719775v1_genomic.fna	Proteobacteria
GCF_007475525.1_ASM747552v1_genomic.fna	Verrucomicrobiota
GCF_007641255.1_ASM764125v1_genomic.fna	Firmicutes
GCF_007904085.1_ASM790408v1_genomic.fna	Cyanobacteria
GCF_007970665.1_ASM797066v1_genomic.fna	Actinobacteriota
GCF_008087625.1_ASM808762v1_genomic.fna	Planctomycetota
GCF_008329945.1_ASM832994v1_genomic.fna	Spirochaetota
GCF_008728835.1_ASM872883v1_genomic.fna	Proteobacteria
GCF_008838325.1_ASM883832v1_genomic.fna	Chloroflexota
GCF_008843145.1_ASM884314v1_genomic.fna	Proteobacteria
GCF_008931845.1_ASM893184v1_genomic.fna	Spirochaetota
GCF_009177095.1_ASM917709v1_genomic.fna	Planctomycetota
GCF_009649955.1_ASM964995v1_genomic.fna	Firmicutes
GCF_009650215.1_ASM965021v1_genomic.fna	Actinobacteriota
GCF_009662475.1_ASM966247v1_genomic.fna	Proteobacteria
GCF_009708955.1_ASM970895v1_genomic.fna	Proteobacteria
GCF_009720525.1_ASM972052v1_genomic.fna	Planctomycetota
GCF_009856525.1_ASM985652v1_genomic.fna	Proteobacteria
GCF_009882915.1_ASM988291v1_genomic.fna	Proteobacteria
GCF_009936135.1_ASM993613v1_genomic.fna	Patescibacteria
GCF_009936215.1_ASM993621v1_genomic.fna	Thermotogota
GCF_010093065.1_ASM1009306v1_genomic.fna	Bacteroidota
GCF_010669305.1_ASM1066930v1_genomic.fna	Firmicutes
GCF_011044775.1_ASM1104477v1_genomic.fna	Verrucomicrobiota
GCF_011066545.1_ASM1106654v1_genomic.fna	Planctomycetota
GCF_011067105.1_ASM1106710v1_genomic.fna	Deinococcota
GCF_011089885.1_ASM1108988v1_genomic.fna	Proteobacteria
GCF_011250635.1_ASM1125063v1_genomic.fna	Actinobacteriota
GCF_011492945.1_ASM1149294v1_genomic.fna	Actinobacteriota
GCF_011761565.1_ASM1176156v1_genomic.fna	Proteobacteria
GCF_011764505.1_ASM1176450v1_genomic.fna	Proteobacteria
GCF_011812965.1_ASM1181296v1_genomic.fna	Spirochaetota
GCF_012184425.1_ASM1218442v1_genomic.fna	Nitrospirota
GCF_012222825.1_ASM1222282v1_genomic.fna	Proteobacteria
GCF_012317585.1_ASM1231758v1_genomic.fna	Desulfobacterota
GCF_012769535.1_ASM1276953v1_genomic.fna	Proteobacteria
GCF_012863495.1_ASM1286349v1_genomic.fna	Cyanobacteria
GCF_012955605.1_ASM1295560v1_genomic.fna	Firmicutes
GCF_012979235.1_ASM1297923v1_genomic.fna	Desulfobacterota
GCF_013004105.1_ASM1300410v1_genomic.fna	Gemmatimonadota
GCF_013046825.1_ASM1304682v1_genomic.fna	Firmicutes
GCF_013177315.1_ASM1317731v1_genomic.fna	Cyanobacteria
GCF_013282625.1_ASM1328262v1_genomic.fna	Proteobacteria
GCF_013343005.1_ASM1334300v1_genomic.fna	Proteobacteria
GCF_013376455.1_ASM1337645v1_genomic.fna	Desulfobacterota
GCF_013393365.1_ASM1339336v1_genomic.fna	Firmicutes
GCF_013664685.1_ASM1366468v1_genomic.fna	Firmicutes
GCF_014198875.1_ASM1419887v1_genomic.fna	Gemmatimonadota
GCF_014202505.1_ASM1420250v1_genomic.fna	Armatimonadota
GCF_014274465.1_ASM1427446v1_genomic.fna	Acidobacteriota
GCF_014396165.1_ASM1439616v1_genomic.fna	Firmicutes
GCF_014467015.1_ASM1446701v1_genomic.fna	Firmicutes
GCF_014643535.1_ASM1464353v1_genomic.fna	Proteobacteria
GCF_014646935.1_ASM1464693v1_genomic.fna	Firmicutes
GCF_014651515.1_ASM1465151v1_genomic.fna	Proteobacteria
GCF_014672695.1_ASM1467269v1_genomic.fna	Proteobacteria
GCF_014672715.2_ASM1467271v2_genomic.fna	Chloroflexota
GCF_014695385.1_ASM1469538v1_genomic.fna	Cyanobacteria
GCF_014696065.1_ASM1469606v1_genomic.fna	Cyanobacteria
GCF_014701195.1_ASM1470119v1_genomic.fna	Thermotogota
GCF_014701235.1_ASM1470123v1_genomic.fna	Nitrospirota
GCF_014857065.1_ASM1485706v1_genomic.fna	Proteobacteria
GCF_014931565.1_ASM1493156v1_genomic.fna	Firmicutes
GCF_015097055.1_ASM1509705v1_genomic.fna	Firmicutes
GCF_015169395.1_ASM1516939v1_genomic.fna	Planctomycetota
GCF_015277775.1_ASM1527777v1_genomic.fna	Acidobacteriota
GCF_015500095.1_ASM1550009v1_genomic.fna	Chloroflexota
GCF_015775515.1_ASM1577551v1_genomic.fna	Atribacterota
GCF_016097415.1_ASM1609741v1_genomic.fna	Proteobacteria
GCF_016406105.1_ASM1640610v1_genomic.fna	Firmicutes
GCF_016446285.1_ASM1644628v1_genomic.fna	Desulfobacterota
GCF_016495725.1_ASM1649572v1_genomic.fna	Firmicutes
GCF_016583645.1_ASM1658364v1_genomic.fna	Proteobacteria
GCF_016592575.1_ASM1659257v1_genomic.fna	Acidobacteriota
GCF_016638705.1_ASM1663870v1_genomic.fna	Firmicutes
GCF_016724785.1_ASM1672478v1_genomic.fna	Fusobacteriota
GCF_016725645.1_ASM1672564v1_genomic.fna	Bacteroidota
GCF_016745835.1_ASM1674583v1_genomic.fna	Firmicutes
GCF_016767175.1_ASM1676717v1_genomic.fna	Firmicutes
GCF_016772275.1_ASM1677227v1_genomic.fna	Firmicutes
GCF_016925555.1_ASM1692555v1_genomic.fna	Firmicutes
GCF_017298635.1_ASM1729863v1_genomic.fna	Firmicutes
GCF_017301615.1_ASM1730161v1_genomic.fna	Firmicutes
GCF_017347585.1_ASM1734758v1_genomic.fna	Firmicutes
GCF_017347605.1_ASM1734760v1_genomic.fna	Bacteroidota
GCF_017352215.1_ASM1735221v1_genomic.fna	Firmicutes
GCF_017358165.1_ASM1735816v1_genomic.fna	Thermotogota
GCF_017377355.1_ASM1737735v1_genomic.fna	Desulfobacterota
GCF_017893965.1_ASM1789396v1_genomic.fna	Spirochaetota
GCF_017901135.1_ASM1790113v1_genomic.fna	Proteobacteria
GCF_018069625.1_ASM1806962v1_genomic.fna	Actinobacteriota
GCF_018075365.1_ASM1807536v1_genomic.fna	Firmicutes
GCF_018137965.1_ASM1813796v1_genomic.fna	Verrucomicrobiota
GCF_018141525.1_ASM1814152v1_genomic.fna	Actinobacteriota
GCF_018223745.1_ASM1822374v1_genomic.fna	Firmicutes
GCF_018326305.1_ASM1832630v1_genomic.fna	Firmicutes
GCF_018326425.1_ASM1832642v1_genomic.fna	Firmicutes
GCF_018389385.1_ASM1838938v1_genomic.fna	Cyanobacteria
GCF_018398935.1_ASM1839893v1_genomic.fna	Planctomycetota
GCF_018409545.1_ASM1840954v1_genomic.fna	Proteobacteria
GCF_018417475.1_ASM1841747v1_genomic.fna	Proteobacteria
GCF_018420025.1_ASM1842002v1_genomic.fna	Patescibacteria
GCF_018436245.1_ASM1843624v1_genomic.fna	Proteobacteria
GCF_018736045.1_ASM1873604v1_genomic.fna	Bacteroidota
GCF_018736085.1_ASM1873608v1_genomic.fna	Proteobacteria
GCF_018835585.1_ASM1883558v1_genomic.fna	Firmicutes
GCF_018866305.1_ASM1886630v1_genomic.fna	Actinobacteriota
GCF_018966525.1_ASM1896652v1_genomic.fna	Firmicutes
GCF_019039255.1_ASM1903925v1_genomic.fna	Actinobacteriota
GCF_019063885.1_ASM1906388v1_genomic.fna	Desulfobacterota
GCF_019186805.1_ASM1918680v1_genomic.fna	Proteobacteria
GCF_019203965.1_ASM1920396v1_genomic.fna	Proteobacteria
GCF_900066015.1_Cfx-K_genomic.fna	Chloroflexota
GCF_900070205.1_JGI_assembly_genomic.fna	Bacteroidota
GCF_900101835.1_IMG-taxon_2634166305_annotated_assembly_genomic.fna	Firmicutes
GCF_900104455.1_IMG-taxon_2622736508_annotated_assembly_genomic.fna	Firmicutes
GCF_900105925.1_IMG-taxon_2639762615_annotated_assembly_genomic.fna	Actinobacteriota
GCF_900112165.1_IMG-taxon_2597490362_annotated_assembly_genomic.fna	Spirochaetota
GCF_900112605.1_IMG-taxon_2595698212_annotated_assembly_genomic.fna	Proteobacteria
GCF_900115765.1_IMG-taxon_2693429901_annotated_assembly_genomic.fna	Firmicutes
GCF_900141835.1_IMG-taxon_2585428088_annotated_assembly_genomic.fna	Firmicutes
GCF_900142105.1_IMG-taxon_2585428153_annotated_assembly_genomic.fna	Firmicutes
GCF_900167165.1_IMG-taxon_2568526009_annotated_assembly_genomic.fna	Firmicutes
GCF_900167455.1_IMG-taxon_2582581318_annotated_assembly_genomic.fna	Proteobacteria
GCF_900176145.1_IMG-taxon_2506210005_annotated_assembly_genomic.fna	Firmicutes
GCF_900187035.1_50279_G02_genomic.fna	Firmicutes
GCF_900187885.1_IMG-taxon_2140918011_annotated_assembly_genomic.fna	Chloroflexota
GCF_900465355.1_Ran1-1_genomic.fna	Bipolaricaulota
GCF_900538055.1_ERZ1024078_genomic.fna	Firmicutes
GCF_900637305.1_50618_F02_genomic.fna	Proteobacteria
GCF_902459485.1_pb_189-2_HGAP3_CTR_genomic.fna	Proteobacteria
GCF_904373265.1_Chicken_11_mag_32_genomic.fna	Firmicutes
GCF_907164845.1_Lysobacter_CECT30171_genomic.fna	Proteobacteria

[truncated: 6 more sheets: S11_Archaeal_RP_Reference_Seqs, S12_MEBS, S13_KEGG, S14_McrA, S15_NiFe_Reference_Seqs, S16_FeFe_Reference_Seqs]
